# 1 COVID-19 Susceptibility and Severity Risks in a Survey of Over 500,000 People

2 Spencer C. Knight\*<sup>1</sup>, Shannon R. McCurdy\*<sup>1</sup>, Brooke Rhead<sup>1</sup>, Marie V. Coignet<sup>1</sup>, Danny S.  
3 Park<sup>1</sup>, Genevieve H.L. Roberts<sup>2</sup>, Nathan D. Berkowitz<sup>1</sup>, Miao Zhang<sup>1</sup>, David Turissini<sup>1</sup>, Karen  
4 Delgado<sup>2</sup>, Milos Pavlovic<sup>2</sup>, AncestryDNA Science Team<sup>2</sup>, Asher K. Haug Baltzell<sup>2</sup>, Harendra  
5 Guturu<sup>1</sup>, Kristin A. Rand<sup>1</sup>, Ahna R. Girshick<sup>1</sup>, Eurie L. Hong<sup>1</sup>, Catherine A. Ball<sup>1</sup>

6  
7 \*These authors contributed equally to this work.

8 1. AncestryDNA, 153 Townsend St, Suite 800, San Francisco, CA, 94107

9 2. AncestryDNA, 1300 West Traverse Parkway, Lehi, UT 84043

10 **Corresponding Author:** Catherine Ball, [cball@ancestry.com](mailto:cball@ancestry.com)

## 11 12 **Abstract**

13 The growing toll of the COVID-19 pandemic has heightened the urgency of identifying  
14 individuals most at risk of infection and severe outcomes, underscoring the need to assess  
15 susceptibility and severity patterns in large datasets.<sup>1</sup> The AncestryDNA COVID-19 Study  
16 collected self-reported survey data on symptoms, outcomes, risk factors, and exposures for over  
17 563,000 adult individuals in the U.S., including over 4,700 COVID-19 cases as measured by a  
18 self-reported positive nasal swab test. We observed significant associations between several risk  
19 factors and COVID-19 susceptibility and severity outcomes. Many of the susceptibility  
20 associations were accounted for by differences in known exposures; a notable exception was  
21 elevated susceptibility odds for males after adjusting for known exposures and age. We also  
22 leveraged the dataset to build risk models to robustly predict individualized COVID-19  
23 susceptibility (area under the curve [AUC]=0.84) and severity outcomes including  
24 hospitalization and life-threatening critical illness amongst COVID-19 cases (AUC=0.87 and  
25 0.90, respectively). The results highlight the value of self-reported epidemiological data at scale  
26 to provide public health insights into the evolving COVID-19 pandemic.

27

28 **Main**

29 The COVID-19 pandemic has resulted in nearly 35 million COVID-19 cases and more than  
30 1,000,000 deaths worldwide,<sup>2</sup> including nearly 7.5 million cases and more than 210,000 deaths in  
31 the United States as of early October 2020.<sup>3</sup> The growing impact of the pandemic intensifies the  
32 need for enhanced understanding of COVID-19 susceptibility and severity risk factors, not only  
33 for public health experts, but also for individuals seeking to assess their own personalized risk.  
34 Prior research has hypothesized that differences in COVID-19 *susceptibility* are related to age,<sup>4</sup>  
35 sex-dependent immune responses,<sup>5</sup> and genetics,<sup>6,7</sup> while heightened *severity* of COVID-19  
36 illness is associated with risk factors such as age,<sup>1,4,8,9</sup> sex,<sup>5,10-12</sup> underlying health  
37 conditions,<sup>1,9,10,13,14</sup> and genetic factors including the ABO blood group.<sup>15</sup> Self-reported survey  
38 data, which can easily be collected in the home, afford the opportunity to dynamically monitor  
39 the continually evolving pandemic and allow for real-time estimation of individual-level  
40 COVID-19 risk.<sup>16-19</sup> Furthermore, self-reported surveys allow for collection of information about  
41 known exposures, of which few epidemiological COVID-19 studies have explicitly accounted  
42 for in association analyses to date.<sup>20</sup>

43  
44 In this paper, we aim to provide insight into factors associated with susceptibility and severity of  
45 COVID-19 using a large survey cohort of 563,141 AncestryDNA customers who have consented  
46 to participate in the AncestryDNA COVID-19 Study (Supplementary Tables 1-6).<sup>6</sup> We found  
47 that known exposure differences account for many associations for a positive COVID-19 test  
48 result.<sup>18,21</sup> Further analysis yielded evidence that males may be more susceptible to COVID-19  
49 than females after adjusting for known exposures and age. While several previous reports have  
50 documented increased severity risk in males,<sup>5,11,13</sup> the finding of sex-based differences in

51 susceptibility here warrants further investigation. This study also replicates previous reports of  
52 strong associations between certain health conditions, age, and COVID-19 severity,<sup>1,8-14</sup> many of  
53 which remain significant after adjusting for other risk factors. We additionally investigated the  
54 symptomatology of COVID-19, and found that the symptoms most strongly associated with a  
55 positive test result are distinct from the symptoms most strongly associated with severity.<sup>17,18,22,23</sup>  
56  
57 Finally, we built predictive risk models for COVID-19 susceptibility and severity outcomes. For  
58 susceptibility, we designed two models and additionally applied two literature-based models<sup>18</sup> to  
59 predict COVID-19 cases among respondents reporting a test result. We also designed models to  
60 predict two different COVID-19 severity outcomes based on minimal information about  
61 demographics, health conditions, and symptoms: hospitalization due to COVID-19 infection  
62 (referred to throughout as “hospitalization”) and progression of an infection to a life-threatening  
63 critical case among those reporting a positive COVID-19 result (referred to throughout as  
64 “critical case”; Methods).<sup>13</sup> Both the susceptibility and severity models are robust and  
65 generalizable across a large internal holdout set, and could potentially serve as tools for  
66 understanding individualized COVID-19 susceptibility and severity risk.<sup>1,16-19,24</sup>

67  
68 **Survey description.** Survey responses were collected from AncestryDNA customers (see  
69 Methods and Supplementary Table 3 for demographic information). The survey collected self-  
70 reported responses to questions about COVID-19 test results, 15 symptoms among those who  
71 tested positive or who tested negative and had flu-like symptoms, disease progression for  
72 positive testers, age, height, weight, known exposures to biological relatives, household  
73 members, patients or any other contacts with COVID-19, and 11 underlying health conditions  
74 (Supplementary Tables 1 and 2). Data were collected between 22 April 2020 and 6 July 2020,

75 and the survey completion rate was approximately 95%. In general, the COVID-19 positive test  
76 rate and self-reported clinical outcomes are consistent with those reported by the U.S. Centers for  
77 Disease Control and Prevention (CDC) over a similar period (Supplementary Note 1).<sup>21</sup>

78

## 79 **Association Analyses**

80 **Susceptibility.** We investigated associations between COVID-19 testers reporting a positive or  
81 negative result and risk factors within the dataset (Figure 1, Methods, Supplementary Tables 7-  
82 12). Unadjusted odds ratios (ORs) were calculated using simple logistic regression, and adjusted  
83 ORs (aORs) were calculated using multiple logistic regression including known exposures, age,  
84 and sex as risk factors. Unadjusted ORs provide insight into which individual variables are  
85 correlated with testing positive for COVID-19, while adjusted ORs provide insight into which of  
86 these associations are not completely explained due to differences in age, sex, and known  
87 exposures.<sup>25</sup>

88 Known COVID-19 exposures, either through a household case (OR=26.03; 95% confidence  
89 interval [CI]=(22.26, 30.43)), biological relative (OR=5.77; 95% CI=(4.99, 6.68)), or other  
90 source of “direct” exposure (OR=6.94; 95% CI=(6.02, 7.99)) were the strongest predictors of a  
91 positive COVID-19 test result (Figure 1, Supplementary Table 7). In general, adjusting for  
92 known exposures, age, and sex resulted in attenuation of the ORs, with many associations  
93 becoming insignificant after adjustment (Figure 1, Supplementary Tables 8-9). Intriguingly, the  
94 OR for males was not attenuated after adjustment, and males remained at elevated odds after  
95 adjusting for known exposures and age (aOR=1.36; 95% CI=(1.19, 1.55); Figure 1,  
96 Supplementary Table 9). We also note that males and females reported comparable exposure  
97 burden, with males slightly more likely to report a household case of COVID-19 but less likely  
98 to report a case of COVID-19 among biological relatives (Supplementary Tables 11-12).  
99

100 Younger individuals (ages 18-29; OR=1.51; 95% CI=(1.26, 1.81)), as well as individuals of  
101 admixed African-European (OR=1.48; 95% CI=(1.18, 1.85)) or admixed Amerindian ancestry  
102 (OR=1.49; 95% CI=(1.26, 1.77)) were significantly more likely to test positive compared to  
103 older individuals (ages 50-64, the largest age group in this cohort) or those of European ancestry,  
104 respectively (Supplementary Table 7). These individuals reported higher levels of COVID-19  
105 cases within the household, cases among biological relatives, and/or other known “direct”  
106 COVID-19 exposures (Supplementary Tables 10-12).<sup>26-30</sup> Adjusting for age, sex, and known  
107 exposures attenuated the OR for all three of these groups (younger aOR=1.28; 95% CI=(1.03,  
108 1.59), African-European aOR=1.23; 95% CI=(0.94, 1.62), and Amerindian aOR=1.27; 95%  
109 CI=(1.04, 1.57); Figure 1, Supplementary Table 9).

110  
111 Individuals reporting pre-existing medical conditions (e.g., cancer, cardiovascular disease,  
112 chronic kidney disease [CKD], diabetes, hypertension) were less likely to test positive for  
113 COVID-19 (Figure 1, Supplementary Table 7). We observed significantly decreased odds of a  
114 known “direct” exposure to COVID-19, as well as significantly decreased odds of a household  
115 case of COVID-19, among such individuals relative to those without any health conditions  
116 (OR=0.71; 95% CI=(0.65, 0.78) and OR=0.74; 95% CI=(0.65, 0.84), respectively;  
117 Supplementary Tables 10-11). Notably, individuals with asthma and those with other lung  
118 conditions had significantly decreased odds of testing positive after adjusting for known  
119 exposures, age, and sex (OR=0.82; 95% CI=(0.69, 0.97) and OR=0.67; 95% CI=(0.44, 1.00),  
120 respectively; Supplementary Table 9).

121

122 **Severity.** We investigated associations between demographics, exposures, symptoms, and  
123 underlying health conditions for hospitalization and critical illness progression among COVID-  
124 19 cases (Figure 2, Supplementary Figure 1). Consistent with previous reports,<sup>1,9,12-14</sup> we  
125 observed positive associations between certain health conditions and COVID-19 severity  
126 outcomes; many of these associations remained significant after adjustment for age, sex, and  
127 obesity (BMI  $\geq$  30) (Figure 2, Supplementary Tables 13-16). COVID-19 cases reporting at least  
128 one underlying health condition were significantly more likely to progress to a critical case  
129 (OR=2.85; 95% CI=(1.78, 4.57); Figure 2, Supplementary Figure 1, Supplementary Table 15).  
130 Specific underlying health conditions that were associated with hospitalization and/or critical  
131 case progression included CKD, chronic obstructive pulmonary disease (COPD), diabetes,  
132 cardiovascular disease, and hypertension (Figure 2, Supplementary Figure 1, Supplementary  
133 Tables 13 and 15). Among individuals testing positive for COVID-19, the oldest ( $\geq$ 65 years)  
134 were significantly more likely to be hospitalized compared to those aged 50-64 (OR=1.70; 95%  
135 CI=(1.13, 2.56); Figure 2, Supplementary Table 13). Individuals of admixed African-European  
136 ancestry who tested positive were significantly more likely to report progression to a critical  
137 case, compared to those with European ancestry (OR=2.07; 95% CI=(1.03, 4.17); Supplementary  
138 Figure 1, Supplementary Table 15). Among COVID-19 cases, males were significantly more  
139 likely than females to report progression to a critical case (OR=1.54, 95%; CI=(1.00, 2.37);  
140 Supplementary Figure 1, Supplementary Table 15); these findings are consistent with CDC  
141 reports of increased ICU admittance rates in males (3% vs. 2%).<sup>21</sup>

142

143 **Differential symptomology.** Among symptomatic people who were reported a COVID-19 test  
144 result, those reporting moderate to severe change in taste or smell (OR=7.26; 95% CI=(5.54,  
145 9.50)), fever (OR=1.60; 95% CI=(1.28, 2.01)), or feeling tired or fatigue (OR=1.41; 95%  
146 CI=(1.05, 1.89)) were more likely to test positive (Figure 3, Supplementary Table 7). Those  
147 reporting moderate to severe runny nose (OR=0.59; 95% CI=(0.47, 0.75)) or sore throat  
148 (OR=0.49; 95% CI=(0.39, 0.62)) were more likely to test negative, consistent with previous  
149 reports that these symptoms are more indicative of influenza or the common cold (Figure 3,  
150 Supplementary Table 7).<sup>17,18,22</sup> Change in taste or smell, a hallmark symptom of COVID-19  
151 infection, was not associated with hospitalization (OR=0.77, 95% CI=(0.55, 1.07); Figure 3,  
152 Supplementary Table 13). By contrast, dyspnea (shortness of breath) was the most predictive of  
153 hospitalization and critical case progression (OR=7.52; 95% CI=(4.92, 11.49) and OR=11.55;  
154 95% CI=(5.91, 22.59), respectively),<sup>23</sup> but was not associated with a positive test result  
155 (OR=1.14; 95% CI=(0.91, 1.44); Figure 3, Supplementary Tables 7, 13, and 15).

156



157 **Predictive risk models.** We developed models that predict an individual’s COVID-19 risk  
158 (positive test result or severity). Many predictive models for COVID-19 infection and severity  
159 outcomes have been reported in the literature.<sup>1,16–18,24,31</sup> To date, few large-scale studies have  
160 investigated both susceptibility and severity risk within the same dataset, offering a consistent  
161 and comprehensive understanding of similarities and differences between the two outcomes.

162 For each of the risk models we developed, the survey data were divided into independent training  
163 and test cohorts, and additional association analyses were performed on the training data to guide  
164 the selection of risk factors for the models (Methods, Supplementary Tables 17-20). In contrast  
165 to association analyses, these risk models are based on penalized logistic regression with cross-  
166 validation in order to allow for transferability to independent cohorts.

167 The susceptibility models were designed to predict a COVID-19 result (positive or negative)  
168 from risk factors among testers. In addition to our own two models, we also replicated two self-  
169 reported models from the literature in order to assess how well our models perform relative to a  
170 respected benchmark.<sup>18</sup> In all, we compared four models: our model based on demographics and  
171 exposures (referred to throughout as “Dem + Exp”); our model based on demographics,  
172 exposures, and symptoms (referred to throughout as “Dem + Exp + Symp”); and the two  
173 literature-based models designed with nearly identical risk factors as reported previously in  
174 another large, self-reported study (“How We Feel” (HWF); models referred to as “HWF Exp +  
175 Symp” and “HWF Symp” throughout; Supplementary Note 2, Supplementary Table 20).<sup>18</sup>

176  
177 All four susceptibility models performed robustly, with the Dem + Exp + Symp model achieving  
178 the highest overall performance (Figure 4, Supplementary Tables 21-24). The three models that

179 included one or more symptoms outperformed the model without symptoms (Dem + Exp),  
180 underscoring the value of self-reported symptoms for discriminating between cases and controls.  
181 The Dem + Exp model had an area under the curve (AUC) of 0.84 +/- 0.02, and the most  
182 predictive risk factor was having a household case of COVID-19. The Dem + Exp + Symp  
183 model had an AUC of 0.94 +/- 0.02, and the most predictive symptom was change in taste or  
184 smell. The HWF Exp + Symp model had an AUC of 0.90 +/- 0.03, and the HWF Symp model  
185 had an AUC of 0.87 +/- 0.03 (Supplementary Note 3). Each of the models performed comparably  
186 across different age, sex, and genetic ancestry groups (Supplementary Tables 21-24). We  
187 observed no significant overfitting in any of the models as evidenced by comparable train-test  
188 performances (Supplementary Table 25).

189  
190 We also trained severity models to predict hospitalization and critical illness progression among  
191 COVID-19 cases. We included a number of risk factors and symptoms most associated with  
192 severe COVID-19 outcomes from the literature and/or our training dataset (Figure 3,  
193 Supplementary Tables 18 and 19); these included age,<sup>1,8,9,13</sup> sex,<sup>1,5,11-13</sup> morbid obesity (BMI >=  
194 40),<sup>1,32</sup> and health conditions,<sup>1,9,12-14</sup> as well as shortness of breath,<sup>23</sup> fever, feeling tired or  
195 fatigue, dry cough, and diarrhea for symptoms. Both models performed robustly on an  
196 independent holdout dataset (Figure 4). The hospitalization model had an AUC of 0.87 +/- 0.03,  
197 and the critical case model had an AUC of 0.90 +/- 0.03. For both severity models, shortness of  
198 breath was the most predictive risk factor. We were concerned that this might seem obvious, so  
199 we designed models excluding this symptom which also achieved moderately high  
200 discriminative performance (AUC > 0.80; Supplementary Figure 4). The severity models  
201 performed comparably when stratifying by age, sex, and genetic ancestry (Supplementary Tables

202 26-27), and there was no significant overfitting bias as evidenced by comparable train-test  
203 performances (Supplementary Table 25).

204  
205 In contrast with susceptibility models, we did not evaluate the severity models against literature-  
206 based models, as the vast majority of these models include clinical factors (e.g., bloodwork) not  
207 measured in this self-reported dataset.<sup>1,16,31</sup> However, the models presented here perform on par  
208 with many previously reported models despite the absence of clinical factors, suggesting the  
209 potential value of self-reported data to identify the most at-risk COVID-19 individuals.<sup>16,31</sup>

210  
211 **Discussion.** The AncestryDNA COVID-19 Study provides a highly complete, self-reported  
212 dataset that contains information about a plethora of risk factors in the context of COVID-19  
213 susceptibility and severity outcomes. The self-report framework provides fast, low-cost,  
214 population-scale data that are particularly valuable in a pandemic, where knowledge is both  
215 limited and evolving rapidly based on changing circumstances. Additionally, the broad collection  
216 mechanism enables data-gathering from many more and potentially more diverse participants  
217 than typically seen in a medical setting, and participants can safely provide data from their  
218 homes. Moreover, self-reported data have been shown to be useful for estimating population  
219 prevalence,<sup>19</sup> and models built from these data may help to contextualize individual risk prior to  
220 infection with COVID-19.<sup>1,16-18,24,31</sup>

221  
222 The study highlights exposure burden as the primary risk factor for COVID-19 susceptibility,  
223 and the importance of accounting for known exposures when assessing differences in  
224 susceptibility to COVID-19. Few studies have measured and explicitly adjusted for known

225 COVID-19 exposures at this scale.<sup>20</sup> We found elevated exposure levels for younger individuals,  
226 as well as individuals of admixed African-European or admixed Amerindian ancestry, which  
227 account for at least some of the elevated susceptibility risk for these individuals as evidenced by  
228 attenuation of ORs after adjustment for known exposures and age. This finding is consistent with  
229 previous reports about elevated exposure levels for younger and minority groups within the  
230 U.S.<sup>26-30</sup> By contrast, we found reduced exposure levels among those reporting one or more pre-  
231 existing health conditions. The lower exposure burden observed for these individuals may reflect  
232 pre-pandemic differences in public interactions or increased precautions to mitigate exposure,  
233 given published severity risks associated with these conditions.<sup>1,9,13,14,33,34</sup>

234  
235 Importantly, we found elevated susceptibility risk in males after adjusting for age and known  
236 exposures, and the adjusted odds were not attenuated compared to the unadjusted odds. This  
237 finding is distinct from previous findings on elevated severity risk in males.<sup>1,5,11</sup> This result could  
238 be due to differences between men and women in behaviors, unknown exposures, biology,  
239 genetics,<sup>5-7</sup> or other risk factors not measured within this dataset.

240  
241 Another major contribution of this study is the development of novel risk models for predicting  
242 an individual's COVID-19 susceptibility and severity risk. The risk models presented here  
243 perform comparably or better than similar and more complex models reported previously.<sup>16-</sup>  
244 <sup>18,24,31</sup> This study is also one of few to date to assess and demonstrate relatively strong  
245 performance of risk models across different age, sex, and genetic ancestry groups,<sup>17</sup> highlighting  
246 the potential utility and generalizability of these models to broader populations. Such models  
247 may be useful to clinicians to estimate an individual's risk of infection and/or severity risk, or as

248 a potential tool to triage testing given limited resources.<sup>17,18,22</sup> Just as importantly, the models  
249 could also be used by public health experts to understand population-level risk at large, given  
250 minimal self-reported risk factor data.

251  
252 The COVID-19 pandemic has exacted a historic toll on healthcare systems and global  
253 economies, and continues to evolve based on changes in human behavior, public health  
254 guidelines, and societal factors. The large AncestryDNA network, well-established data  
255 collection mechanisms, and willingness of AncestryDNA customers to participate in COVID-19  
256 research have rapidly come together in this study to elucidate more details about susceptibility  
257 and severe disease risk factors and help point the way to minimizing disease burden.

258  
259

## 260 Methods

261 **Ethics statement.** Ethics statement. All data for this research project were from subjects who  
262 have provided informed consent to participate in AncestryDNA's Human Diversity Project, as  
263 reviewed and approved by our external institutional review board, Advarra (formerly Quorum).  
264 All data were de-identified prior to use.

265 **Study population.** Collection of self-reported COVID-19 outcomes from AncestryDNA  
266 customers who consented to research, participation criteria for the study, and the survey design  
267 are described in a genome-wide association study (GWAS) on a very similar AncestryDNA  
268 dataset, which identified three novel, genome-wide significant loci.<sup>6</sup> Here, participants reporting  
269 a negative test result were also assessed for symptoms and clinical outcomes. Analyses presented  
270 here were performed with data collected between 22 April and 6 July 2020.

271 **Outcome definitions.** The study assessed three outcomes: one for susceptibility and two for  
272 severity of COVID-19 infection. Cases for COVID-19 susceptibility were individuals who  
273 responded, “Yes, and was positive” to the question, “Have you been swab tested for COVID-19,  
274 commonly referred to as coronavirus?” Responders who answered, “Yes, and was negative”  
275 were used as controls for the susceptibility analysis.

276 The hospitalization outcome was defined among COVID-19-positive cases if a participant  
277 responded "Yes" to a binary question about experiencing symptoms due to COVID-19 illness  
278 and "Yes" to the hospitalization question ("Were you hospitalized due to these symptoms?").  
279 Controls were defined by a response of “No” to the hospitalization question in addition to  
280 reporting a self-reported positive COVID-19 test result.<sup>6</sup>

281  
282 Critical cases of COVID-19 were defined via a response of “Yes” to one or more questions about  
283 ICU admittance (“Were you hospitalized in the Intensive Care Unit [ICU] with a ventilator?” or  
284 “Were you hospitalized in the Intensive Care Unit [ICU] with oxygen?”) or, alternatively, self-  
285 reported septic shock, organ failure, or respiratory failure resulting from a COVID-19 infection  
286 (“Have you had any of the following complications due to your illness? Select all that apply.”).<sup>13</sup>

287 Controls were defined by a response of “No” across all of these questions in addition to self-  
288 reporting a positive COVID-19 test result.

289  
290 **Genetic sex and ancestry definitions.** All individuals were genotyped, using previously  
291 described general genotyping and quality control procedures.<sup>35</sup> Both sex and genetic ancestry  
292 were defined for individuals based on their genotypes. Genetic ancestry was estimated using a  
293 proprietary algorithm to estimate continental admixture proportions.<sup>36</sup> Briefly, this algorithm  
294 uses a hidden Markov model to estimate unphased diploid ancestry across the genome by  
295 comparing haplotype structure to a reference panel.

296  
297 **Data preparation for analysis.** Multiple-choice categorical questions were one-hot (“dummy”)  
298 encoded as binary risk factors with  $k-1$  degrees of freedom, where  $k$  corresponds to the number  
299 of fields for a given question. In this framework, a value of 0 across all  $k-1$  fields corresponds to  
300 a response of “None” or “None of the above” for a given question.

301  
302 We considered several risk factors and outcomes questions in our association analyses and risk  
303 modeling efforts, some of which are summarized in Supplementary Tables 1 and 2. Based on the  
304 dependency structure within our survey, not every question was surfaced to every participant  
305 included within our study. As such, we made the following inferences:

- 306
- Participants reporting “No” to a binary question about symptoms arising from COVID-19  
307 infection (“Did you experience symptoms as a result of your condition?”) were  
308 designated as negatives for dependent questions about individual symptoms (“Between  
309 the beginning of February 2020 and now, have you had any of the following



310 symptoms?”), hospitalization due to symptoms (“Were you hospitalized due to these  
311 symptoms?”), ICU admittance due to symptoms (“Were you hospitalized in the Intensive  
312 Care Unit [ICU] with a ventilator?” or “Were you hospitalized in the Intensive Care Unit  
313 ([ICU] with oxygen?”), and medications prescribed due to symptoms (“Did a doctor treat  
314 you with medication for your illness?”)

315 ● Participants reporting “No” to a binary question about hospitalization (“Were you  
316 hospitalized due to these symptoms?”) were assigned to a hospital duration of 0 days and  
317 designated as negative for ICU admittance due to symptoms.

318 ● Participants reporting “No” to a binary question about medications prescribed due to  
319 symptoms (“Did a doctor treat you with medication for your illness?”) were designated as  
320 negative for individual medication fields from a dependent question (“What medication  
321 were you treated with?”).

322  
323 Responses to a question about individual symptoms (“Between the beginning of February 2020  
324 and now, have you had any of the following symptoms?”) were converted to a binary variable  
325 based on the following mapping: 0 = None, Very Mild, Mild; 1 = Moderate, Severe, Very  
326 Severe.

327 **Association analysis.** Analyses were performed either with the *statsmodels* package in Python3  
328 or in base R with the *glm* function. For each susceptibility and severity outcome and risk factor  
329 of interest, a simple logistic regression (LR) model was fit using unpenalized maximum  
330 likelihood.<sup>37</sup> LR models were fit on the entire cohort, except for age, sex, genetic ancestry, and  
331 obesity, where the models were fit only on the appropriate reference population drawn from the  
332 entire cohort (Supplementary Tables 7-16). Multiple logistic regression was used to adjust the  
333 ORs for known COVID-19 exposures and potentially confounding risk factors. The adjusted  
334 model includes age, sex, and four known exposures for susceptibility outcomes (Y/N if any); and  
335 age, sex, obesity (binarized if BMI  $\geq$  30), and health conditions (binarized if any) for severity  
336 outcomes (Figures 1 and 2).

337  
338 For each risk factor, 95% confidence intervals (CIs) for the log odds ratio were estimated under  
339 the normal approximation. The significance threshold was Bonferroni-corrected for the 42  
340 different risk factors examined, leading to an adjusted threshold of  $0.05/42=0.0012$ .<sup>37</sup>

341

## 342 Risk model training and evaluation

343 **Data splitting.** All data were used in the OR analyses; data splitting was performed for risk  
344 modeling only. Prior to model training, the data were split with a fixed random seed. For  
345 susceptibility models without symptoms, 75% of the data were used for model training and 25%  
346 of the data were used for holdout evaluation. For severity models and susceptibility models with  
347 symptoms, 50% of the data were used for model training and 50% of the data were used for  
348 holdout evaluation. The larger holdout set allows for more robust stratified analyses of model  
349 performances, given the smaller overall cohort sizes for models with symptoms.

350  
351 **Predictive risk models.** Logistic regression models were trained and evaluated using the *scikit-*  
352 *learn* package in Python. Here, we used lasso-penalized multiple logistic regression with cross-  
353 validation on the training dataset in order to select an optimal hyperparameterization for  
354 generalizability to independent test sets.<sup>37</sup> The penalized objective function for regression was  
355 weighted by inverse prevalence to address class imbalance and was framed as follows:

356

$$357 \quad Cost(\boldsymbol{\beta}) = -\frac{1}{m} \sum_{j=1}^m \left( \frac{m}{m_{y=y_j}} \right) y_j \text{Ln} \left( \text{Logistic}(\boldsymbol{\beta} \cdot \mathbf{x}_j) \right) + \left( \frac{m}{m_{y=y_j}} \right) (1 - y_j) \text{Ln} \left( 1 - \text{Logistic}(\boldsymbol{\beta} \cdot \mathbf{x}_j) \right) +$$
$$358 \quad \frac{\lambda}{m} \sum_{i=0}^n |\beta_i|$$

359

360 where  $m$  is the number of training examples,  $y_j$  is the true value of the outcome variable for the  
361  $j$ th observation within the training data,  $m_{y=y_j}$  is the number of training examples with  $y=y_j$ ,  $\boldsymbol{\beta}$   
362 corresponds to the vector of estimated coefficients for the risk factors,  $\mathbf{x}_j$  is the vector of risk  
363 factor values for the  $j$ th observation within the training data, *Logistic* is the logistic (sigmoid)  
364 function,  $\lambda$  is the regularization parameter which favors simpler models via shrinkage of the beta

365 coefficients,  $n$  is the total number of risk factors in the model,  $\beta_i$  is the regression coefficient for  
366 the  $i$ th risk factor in the model, and  $Ln$  is the natural logarithm.

367 **Risk factor selection and model training.** We chose risk factors based on a minimal subset of  
368 nominally significant ORs within our training data as well as literature guidance.<sup>1,4,5,9,11-14</sup> For  
369 the susceptibility models without symptoms, we included a subset of exposure-related questions,  
370 based on the training OR analyses, as well as two demographic variables (age and sex). For  
371 susceptibility models with symptoms, we additionally included the five symptoms most  
372 differentiated between symptomatic negative and positive testers from our training ORs. For the  
373 severity models, we included pre-existing conditions, based on the training OR analyses,  
374 predictive symptoms within our training dataset<sup>36</sup>, morbid obesity (BMI  $\geq 40$ ), age, and sex.  
375 The full list of risk factors for each model is included in Supplementary Table 20.

376  
377 Once final risk factors were selected, we performed 5-fold cross-validation with grid search on  
378 our training dataset to select an optimal lasso regularization parameter lambda.<sup>37</sup> For the grid  
379 search, we scanned 8 different values for lambda, equally partitioned geometrically across a 4-  
380 log space. We then re-trained on the entire training dataset with the optimal lambda, and  
381 evaluated the final model on the holdout dataset.

382  
383 **Model thresholding.** Phenotypes were predicted from the output of trained models based on a  
384 50% probability threshold (i.e., logistic model output  $> 0.5$ ). Sensitivity and specificity were then  
385 calculated based on the true vs. predicted binary outcomes.

386

387 **Estimation of performance error.** To estimate the error in our model performances, we  
388 bootstrapped our holdout dataset 1,000 times to generate a sampling distribution for each  
389 evaluation metric. We estimated the mean and 95% CIs for each metric based on the mean and  
390 standard deviation of this sampling distribution.<sup>37</sup>

391

## 392 Figures, Tables, and Legends

393 Figures

394

395 **Figure 1:** Odds ratio visualization for susceptibility

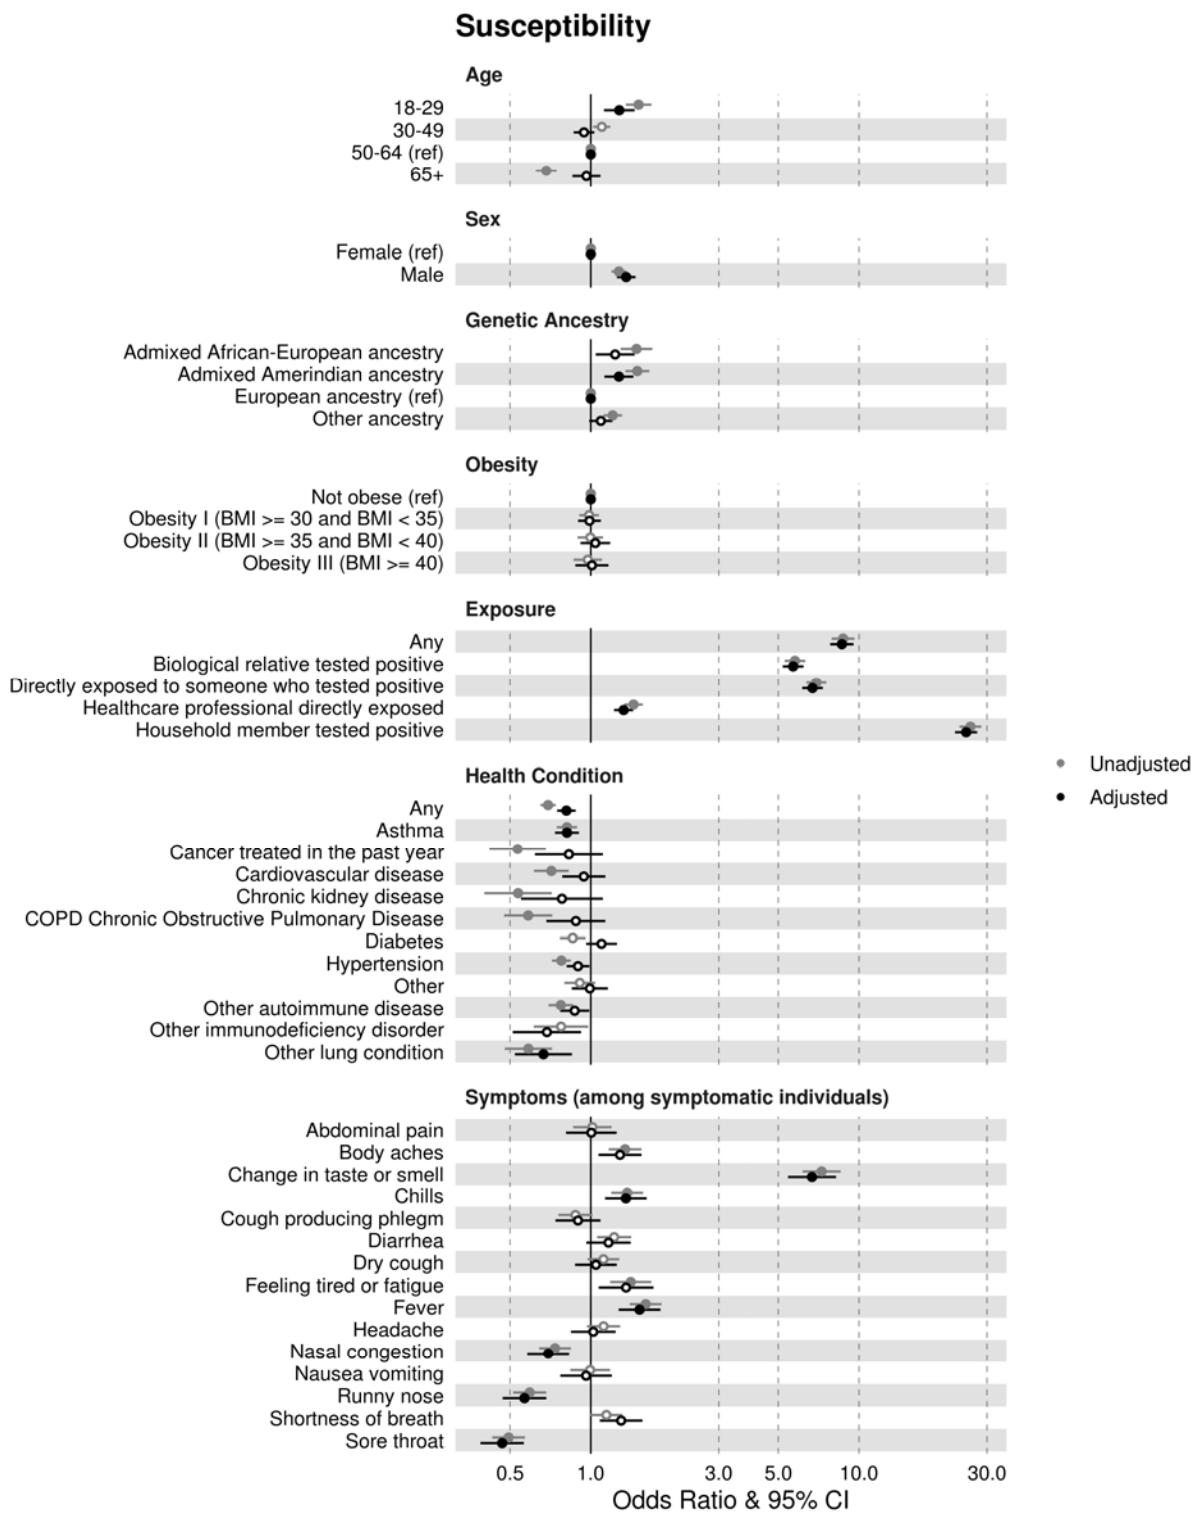

396

397

398 **Figure 1. Susceptibility odds ratios (ORs) and 95% confidence intervals (CIs) estimated**  
399 **from simple (“Unadjusted models,” grey) and multiple (“Adjusted models,” black) logistic**  
400 **regression with adjustment for other risk factors.** Open circles indicate not significant (p-  
401 value > 0.05) after accounting for multiple hypothesis tests using Bonferroni correction. Age,  
402 sex, genetic ancestry, and obesity ORs were estimated in relation to the reference variables  
403 indicated. Exposure, health, and symptom ORs were each estimated separately as binary  
404 variables. Symptom ORs were estimated as binary variables among symptomatic testers only  
405 (Methods). Risk factor adjustments for susceptibility include: sex, age, and at least one known  
406 COVID-19 exposure (Methods).

407  
408

409 **Figure 2:** Odds ratio visualization for severity

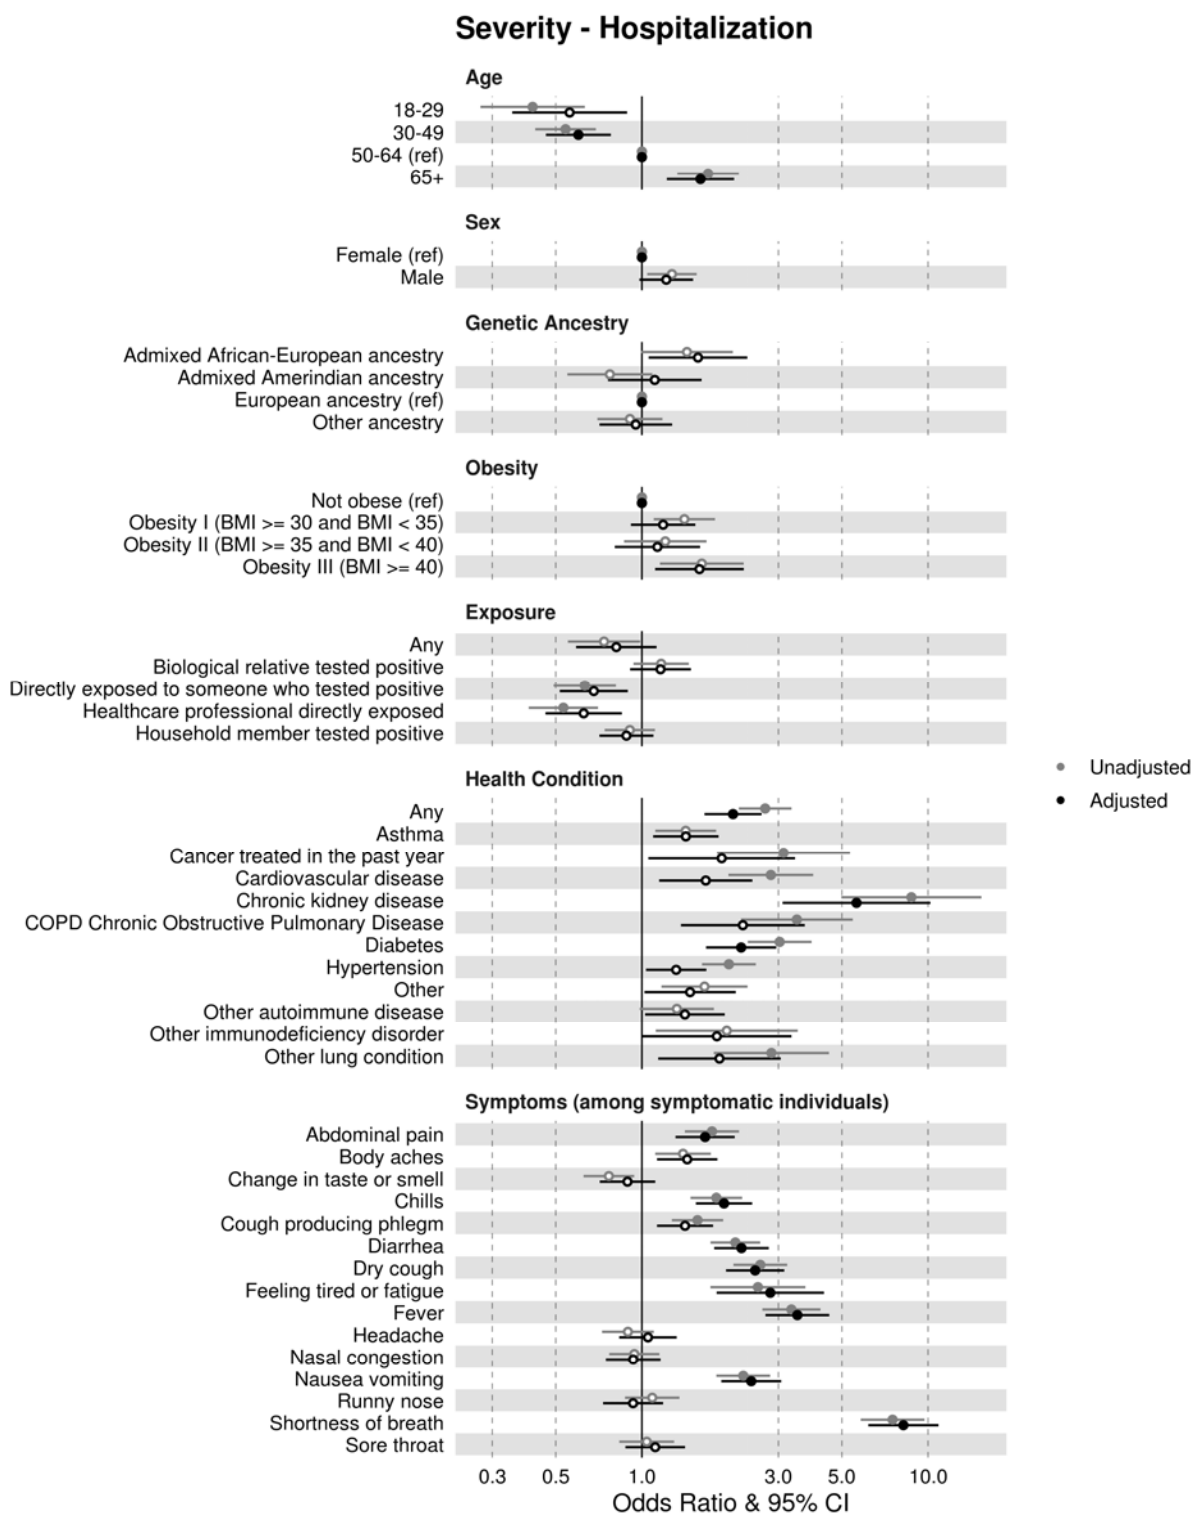

410  
411  
412



413 **Figure 2. Severity (hospitalization) odds ratios (ORs) and 95% confidence intervals (CIs)**  
414 **estimated from simple (“Unadjusted models,” grey) and multiple (“Adjusted models,”**  
415 **black) logistic regression with adjustment for other risk factors.** Open circles indicate not  
416 significant (p-value > 0.05) after accounting for multiple hypothesis tests using Bonferroni  
417 correction. Age, sex, genetic ancestry, and obesity ORs were estimated in relation to the  
418 reference variables indicated. Exposure, health, and symptom ORs were each estimated  
419 separately as binary variables. Symptom ORs were estimated as binary variables among  
420 symptomatic testers only (Methods). Risk factor adjustments for severity include: sex, age,  
421 obesity (Y/N), and underlying health conditions (Y/N if any). See Supplementary Figure 1 for  
422 critical case severity ORs.  
423

424 **Figure 3:** Comparison of susceptibility and severity adjusted ORs

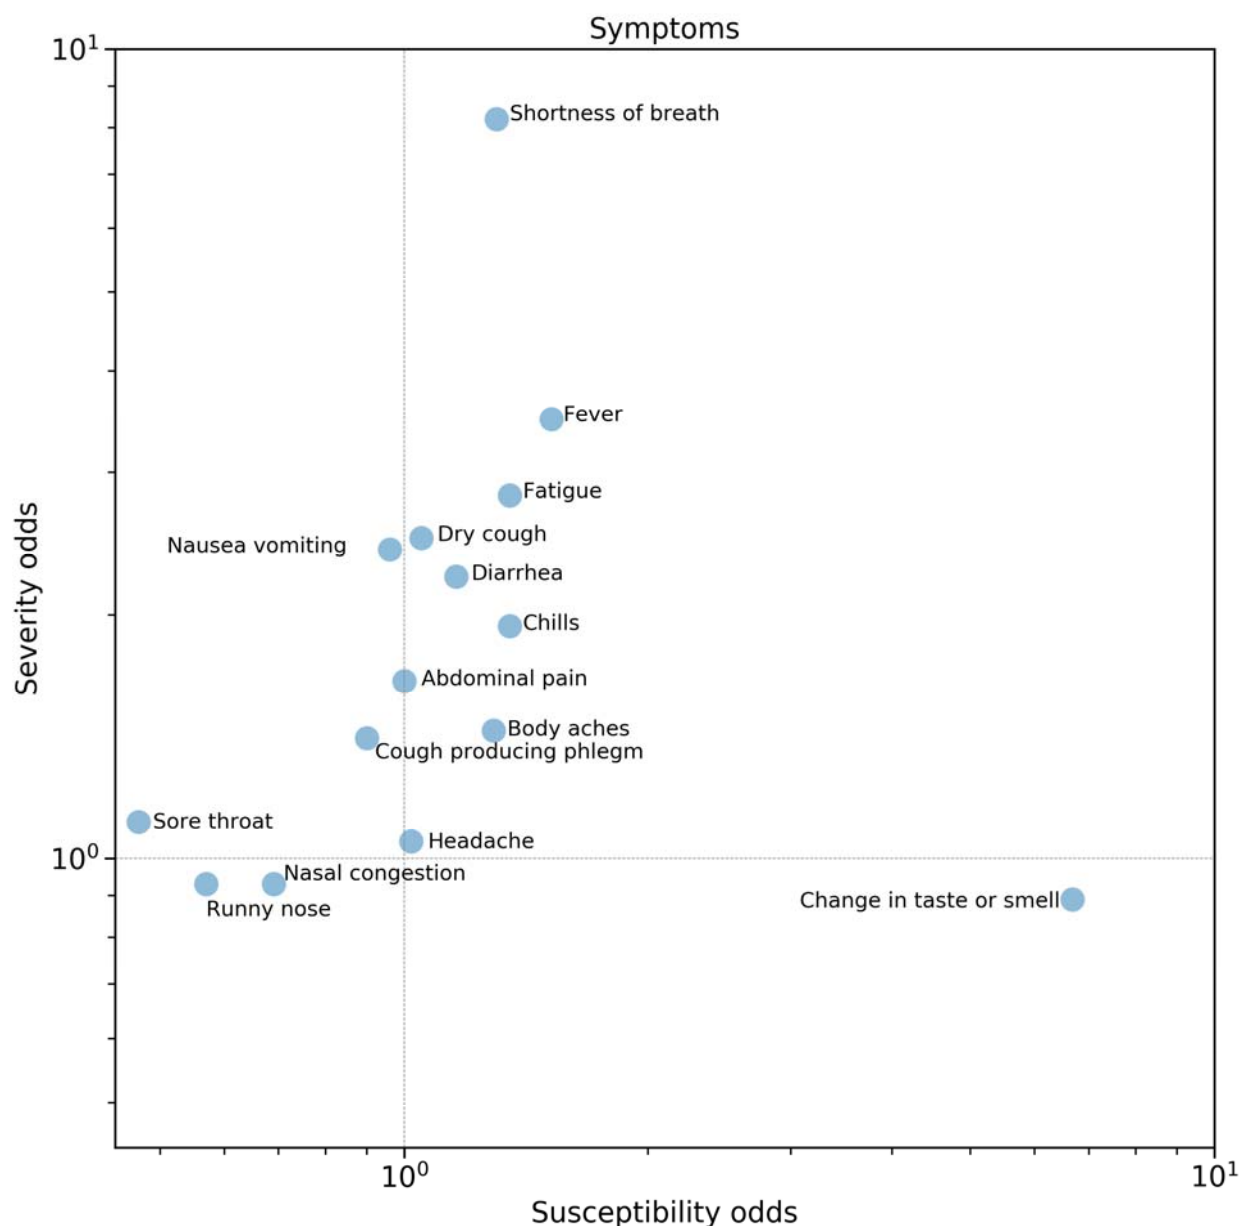

425  
426

427 **Figure 3. Comparison of susceptibility adjusted ORs (horizontal axis) and severity adjusted**  
428 **ORs (vertical axis) for symptoms in Figures 1 and 2. Severity aORs are for hospitalization.**  
429 Note that aORs for susceptibility and severity are adjusted differently according to descriptions  
430 in Figure 1 and 2 captions. Adjusted ORs are plotted on a log scale for visibility. Shortness of  
431 breath is the strongest indicator of increased severity, while change in taste or smell is the

432 strongest indicator for testing positive for COVID-19 among symptomatic individuals  
433 (Methods). See Supplementary Figure 2 for demographic, health condition, and exposure aORs.  
434

435 **Figure 4:** Risk model performance

436

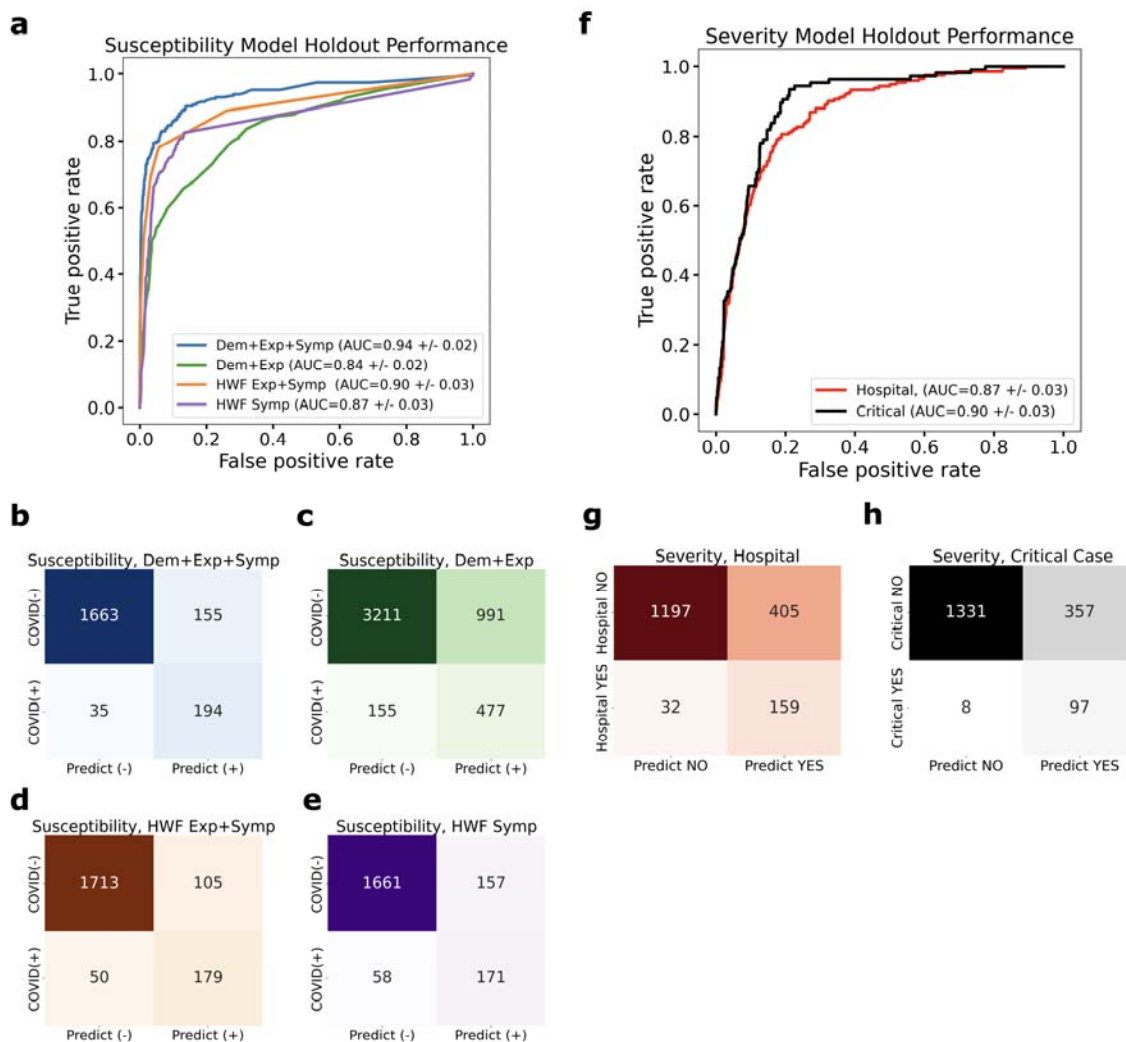

437

438 **Figure 4. Performance of risk models on independent holdout data.** a) Receiver operating

439 characteristic (ROC) curves for susceptibility models to predict COVID-19 cases among testers

440 reporting a result (positive or negative). b) Classification confusion matrix for susceptibility

441 model with five predictive symptoms included. c) Classification confusion matrix for

442 susceptibility model without symptoms. d) Classification confusion matrix for literature-based

443 susceptibility model with three risk factors including change in taste or smell. e) Classification

444 confusion matrix for literature-based susceptibility model with seven COVID-19 symptoms. f)

445 ROC curves for severity models to predict either hospitalization (red) or critical illness  
446 progression (black) among COVID-19 cases. g) Classification confusion matrix for the  
447 hospitalization risk model. h) Classification confusion matrix for the critical case risk model.  
448 Refer to Methods as well as Supplementary Tables 20-27 for additional model performance data  
449 and model risk factor information.

450

451

452 **Data availability** We plan to make a dataset available to qualified scientists through the  
453 European Genome-phenome Archive (EGA). The EGA dataset includes the risk factors and  
454 outcomes studied here, for a different set of individuals.

455 **Acknowledgements** We thank our AncestryDNA customers who made this study possible by  
456 contributing information about their experience with COVID-19 through our survey. Without  
457 them, this work would not be possible. We would like to thank Zach Bass, Robert Dowling,  
458 Disha Akarte, Swapnil Sneham, Sean Enright and the entire Cyborg team for their tireless work  
459 in the release and continued support of the COVID-19 survey.

460 **Author contributions** SCK and SRM contributed equally to the manuscript and wrote the first  
461 draft of the paper. ARG provided direct project guidance and lead the COVID-19 research teams.  
462 SCK, SRM, BR performed the association analyses. SCK developed and assessed the risk  
463 models. MVC and KAR designed the COVID-19 survey questionnaire. SCK and DP supported  
464 the dataset creation. GHLR supported the phenotype definitions. MVC and NDB built the  
465 demographic tables. SCK, SRM, BR, MVC, GHLR, ARG, and KAR helped with additional  
466 analyses and interpretation. MZ, DP, DT, KD, MP, HG, AKHB helped with the EGA dataset.  
467 The AncestryDNA Science Team contributed to additional work, allowing for the completion of  
468 the COVID-19 research and manuscript. KAR, ELH, and CAB provided additional project  
469 guidance. All authors contributed to the final manuscript.

470 **Competing interests** The authors declare competing financial interests: authors affiliated with  
471 AncestryDNA may have equity in Ancestry.

472 **AncestryDNA Science Team:** Yambazi Banda, Ke Bi, Robert Burton, Marjan Champine, Ross  
473 Curtis, Abby Drokhyansky, Ashley Elrick, Cat Foo, Michael Gaddis, Jialiang Gu, Shannon  
474 Hateley, Heather Harris, Shea King, Christine Maldonado, Evan McCartney-Melstad, Alexandra  
475 McFarland, Patty Miller, Luong Nguyen, Keith Noto, Jingwen Pei, Jenna Petersen, Scott Pew,  
476 Chodon Sass, Josh Schraiber, Alisa Sedghifar, Andrey Smelter, Sarah South, Barry Starr, Cecily  
477 Vaughn, Yong Wang

## 478 **Supplementary Materials**

479

### 480 **Supplementary Notes**

481

482 **Supplementary Note 1. Comparison of AncestryDNA Data to CDC Data.** In general, the  
483 COVID-19 testing results are consistent with those reported by the U.S. Centers for Disease  
484 Control and Prevention (CDC) over a similar period.<sup>21</sup> For example, the CDC reported a 12%  
485 cumulative overall positive test rate from 1 March to 30 May 2020, while 14.1% of  
486 AncestryDNA survey participants reported testing positive (the denominator includes tests with  
487 “results pending”). For hospitalization, the CDC reported that 14% of individuals testing positive  
488 for COVID-19 were hospitalized, and 2% were admitted to an intensive care unit (ICU), between  
489 22 January and 30 May 2020. Among the AncestryDNA survey respondents, 11% of those  
490 reporting a positive COVID-19 test were hospitalized, and 4.9% were admitted to ICU between  
491 22 April and 6 July 2020.

492

493 **Supplementary Note 2. Risk factors for predictive susceptibility models.** The HWF Exp +  
494 Symp model includes three risk factors, including two exposures and one symptom (change in  
495 taste or smell, Supplementary Table 20). The HWF Symp model includes seven symptoms most  
496 commonly associated with COVID-19 according to the CDC (Supplementary Table 20).<sup>18,38</sup> For  
497 the Dem + Exp and Dem + Exp + Symp models, we incorporated responses to several exposure  
498 questions that were primary risk factors in the OR analysis of the training set (Methods and  
499 Supplementary Table 20).<sup>18,39,40</sup> We also considered age and sex, given their nominal association  
500 with COVID-19 in our ORs in the training dataset, as well as reports about these variables as



501 risk factors (Supplementary Table 17).<sup>4,5,30</sup> For Dem + Exp + Symp model, we selected the most  
502 differentiated symptoms between cases and controls amongst symptomatic COVID-19 testers  
503 within the training dataset (Supplementary Table 17), including fever, change in taste or smell,  
504 feeling tired/fatigued, runny nose, and sore throat.<sup>17,18,22</sup>

505

506 **Supplementary Note 3. Comparison of Ancestry and HWF Cohorts and Performances.** The

507 HWF models performed better when trained and evaluated on the AncestryDNA dataset as  
508 compared with the HWF dataset, particularly for the symptoms-only model (HWF Symp:  
509 AncestryDNA-trained AUC=0.87 and HWF-trained AUC=0.76 and HWF Exp + Symp:  
510 AncestryDNA-trained AUC=0.90 and HWF-trained AUC=0.87; Figure 4).<sup>18</sup> This result could be  
511 due to differences in survey flow design, demographics, or the relative prevalences of self-  
512 reported symptoms between the two datasets. We re-trained and evaluated our models on a  
513 subset of symptomatic COVID-19 testers (positives and negatives) reporting at least one  
514 symptom of moderate or greater intensity. The performances of all models that included  
515 symptoms were slightly attenuated in this cohort, with AUCs for the HWF models approaching  
516 previous reports (HWF Symp: AncestryDNA-trained AUC=0.80 and HWF Exp + Symp:  
517 AncestryDNA-trained AUC=0.87); the model without symptoms performed the same  
518 (Supplementary Figure 3). This suggests that predicting COVID-19 cases on the basis of  
519 symptoms alone is more challenging when symptoms are less differentiated between positive and  
520 negative testers.

521

522

523 **Supplementary Tables**

524 **Supplementary Table 1. Selected subset of survey questions considered in the context of**  
 525 **COVID-19 severity outcomes analysis and modeling efforts.**

526

| Risk factor description                                        | Question                                                                                                                                  | Possible responses                                                                                                                                                                                                                                                                                                                                                                                          |
|----------------------------------------------------------------|-------------------------------------------------------------------------------------------------------------------------------------------|-------------------------------------------------------------------------------------------------------------------------------------------------------------------------------------------------------------------------------------------------------------------------------------------------------------------------------------------------------------------------------------------------------------|
| <b>COVID-19 test result</b>                                    | Have you been swab tested for COVID-19, commonly referred to as coronavirus?                                                              | Yes, and was positive; Yes, and was negative; Yes, and my results are pending; No, but I have had flu-like symptoms with a fever at some point since the beginning of February 2020; No, and I have not had flu-like symptoms at some point since the beginning of February 2020                                                                                                                            |
| <b>Case amongst direct biological relatives (multi-choice)</b> | Have any of your biological relatives tested positive for COVID-19? Select all that apply.                                                | Grandparent(s); Parent(s); Child(ren); Sibling(s); Other; None                                                                                                                                                                                                                                                                                                                                              |
| <b>Healthcare worker routinely exposed to COVID-19</b>         | Are you a healthcare professional working directly with or in close physical proximity to patients who have tested positive for COVID-19? | Yes; No; Not sure                                                                                                                                                                                                                                                                                                                                                                                           |
| <b>Household case of COVID-19</b>                              | Has someone in your household tested positive for COVID-19?                                                                               | Yes; No; Not sure                                                                                                                                                                                                                                                                                                                                                                                           |
| <b>Number of household cases of COVID-19</b>                   | How many people in your household have tested positive for COVID-19?                                                                      | Numeric                                                                                                                                                                                                                                                                                                                                                                                                     |
| <b>Known direct COVID-19 exposure</b>                          | Have you been directly exposed to someone who has tested positive for COVID-19?                                                           | Yes; No; Not sure                                                                                                                                                                                                                                                                                                                                                                                           |
| <b>Health condition(s)</b>                                     | Do you currently have any of the following health conditions? Select all that apply.                                                      | Asthma, COPD (Chronic Obstructive Pulmonary Disease); Other lung condition; Cancer (treated in the past year); Cardiovascular disease; Chronic kidney disease; Diabetes; Hypertension; Organ failure requiring a transplant (in the last year); Blood disorder requiring hematopoietic stem cell / bone marrow transplant; Other autoimmune disease; Other immunodeficiency disorder; Other; None; Not sure |

527  
 528 The survey flow was as described previously,<sup>6</sup> with the addition of symptom and clinical  
 529 assessment for negative testers.

530 **Supplementary Table 2. Selected risk factors considered in susceptibility or severity**  
 531 **outcomes analysis and modeling efforts.**

532

| Risk factor description                     | Question                                                                                    | Possible responses                                                                                                                                                                                                                                                               |
|---------------------------------------------|---------------------------------------------------------------------------------------------|----------------------------------------------------------------------------------------------------------------------------------------------------------------------------------------------------------------------------------------------------------------------------------|
| <b>COVID-19 test result</b>                 | Have you been swab tested for COVID-19, commonly referred to as coronavirus?                | Yes, and was positive; Yes, and was negative; Yes, and my results are pending; No, but I have had flu-like symptoms with a fever at some point since the beginning of February 2020; No, and I have not had flu-like symptoms at some point since the beginning of February 2020 |
| <b>Symptoms (binary)</b>                    | Did you experience symptoms as a result of your condition?                                  | Yes; No; Not sure                                                                                                                                                                                                                                                                |
| <b>Symptoms (multi-choice)</b>              | Between the beginning of February 2020 and now, have you had any of the following symptoms? | Fever; Shortness of breath; Dry cough; Nasal congestion; Runny nose; Sore throat; Feeling tired or fatigue; Chills; Body aches; Headache; Cough producing phlegm; Abdominal pain; Nausea or vomiting; Diarrhea; Change in taste or smell                                         |
| <b>Symptom duration (multi-choice)</b>      | How long did these symptoms last?                                                           | Less than 1 day; 1-3 days; 4-7 days; 8-14 days; 2 weeks to a month; 1-3 months; More than 3 months                                                                                                                                                                               |
| <b>Hospitalization</b>                      | Were you hospitalized due to these symptoms?                                                | Yes; No; Not sure                                                                                                                                                                                                                                                                |
| <b>Hospital duration</b>                    | How long were you hospitalized?                                                             | Numeric                                                                                                                                                                                                                                                                          |
| <b>ICU with ventilator</b>                  | Were you hospitalized in the Intensive Care Unit (ICU) with a ventilator?                   | Yes; No; Not sure                                                                                                                                                                                                                                                                |
| <b>ICU with oxygen</b>                      | Were you hospitalized in the Intensive Care Unit (ICU) with oxygen?                         | Yes; No; Not sure                                                                                                                                                                                                                                                                |
| <b>Illness complications (multi-choice)</b> | Have you had any of the following complications due to your illness? Select all that apply. | None; Pneumonia; Severe pneumonia leading to hospitalization; Respiratory failure; Septic shock; Multiple organ dysfunction or failure; Blood clots; Stroke; Other                                                                                                               |

533  
 534 The survey flow was as described previously,<sup>6</sup> with the addition of symptom and clinical  
 535 assessment for negative testers.

536  
 537  
 538

539 **Supplementary Table 3. Study population demographic summary**

540

|                                                | <b>COVID-19<br/>Nasopharyngeal<br/>Swab Test<br/>Positive</b> | <b>COVID-19<br/>Nasopharyngeal<br/>Swab Test<br/>Negative</b> | <b>Full AncestryDNA<br/>COVID-19 Cohort</b> |
|------------------------------------------------|---------------------------------------------------------------|---------------------------------------------------------------|---------------------------------------------|
|                                                | <i>n = 4,726</i>                                              | <i>n = 28,872</i>                                             | <i>n = 563,141</i>                          |
| <b>Age</b>                                     |                                                               |                                                               |                                             |
| Median, mean (sd)                              | 49, 49.49 (15.43)                                             | 53, 52.68 (15.5)                                              | 56, 53.90 (16.13)                           |
| Bins (Counts, %)                               |                                                               |                                                               |                                             |
| 18-30                                          | 600 (0.13)                                                    | 2496 (0.09)                                                   | 52580 (0.09)                                |
| 31-40                                          | 941 (0.2)                                                     | 5001 (0.17)                                                   | 87261 (0.15)                                |
| 41-50                                          | 926 (0.2)                                                     | 5333 (0.18)                                                   | 90473 (0.16)                                |
| 51-60                                          | 1057 (0.22)                                                   | 6009 (0.21)                                                   | 108062 (0.19)                               |
| 61-70                                          | 735 (0.16)                                                    | 5961 (0.21)                                                   | 128200 (0.23)                               |
| 71-90                                          | 467 (0.10)                                                    | 4072 (0.14)                                                   | 96565 (0.17)                                |
| <b>Genetic Sex (counts, %)</b>                 |                                                               |                                                               |                                             |
| Female                                         | 3013 (0.64)                                                   | 19945 (0.69)                                                  | 380349 (0.67)                               |
| Male                                           | 1706 (0.36)                                                   | 8867 (0.31)                                                   | 183153 (0.32)                               |
| <b>Genetic Ancestry Continental Groupings</b>  |                                                               |                                                               |                                             |
| Admixed African-European ancestry              | 275 (0.06)                                                    | 1244 (0.04)                                                   | 17019 (0.03)                                |
| Admixed Amerindian ancestry                    | 520 (0.11)                                                    | 2336 (0.08)                                                   | 36865 (0.07)                                |
| European ancestry                              | 3026 (0.64)                                                   | 20269 (0.7)                                                   | 424328 (0.75)                               |
| Other ancestry                                 | 905 (0.19)                                                    | 5023 (0.17)                                                   | 84929 (0.15)                                |
| <b>Pre-existing health conditions (any)</b>    | 1911 (0.46)                                                   | 15261 (0.55)                                                  | 255788 (0.47)                               |
| <b>BMI (med, mean, sd)</b>                     | 28.59, 29.83 (7.04)                                           | 28.67, 29.92 (7.05)                                           | 28.29, 29.53 (6.87)                         |
| <b>Underweight (count, %)</b>                  | <100                                                          | 204                                                           | 4407                                        |
| <b>Healthy (count, %)</b>                      | 971                                                           | 6442                                                          | 139565                                      |
| <b>Overweight (count, %)</b>                   | 1225                                                          | 8503                                                          | 172941                                      |
| <b>Obese (count, %)</b>                        | 1629                                                          | 11264                                                         | 203325                                      |
| <b>Flu</b>                                     |                                                               |                                                               |                                             |
| Shot (yes)                                     | 2656 (0.63)                                                   | 19856 (0.71)                                                  | 356144 (0.65)                               |
| Test Dx (yes)                                  | 198 (0.05)                                                    | 1180 (0.04)                                                   | 11726 (0.02)                                |
| <b>Symptoms (tested pos.)</b>                  |                                                               |                                                               |                                             |
| General, yes (count, % of pos.)                | 3862 (0.87)                                                   |                                                               | 9237 (0.47)                                 |
| <b>Hospitalization (count, % of positives)</b> | 453 (0.11)                                                    |                                                               | 1397 (0.02)                                 |
| Duration, days (med, mean, sd)                 | 5, 7.62 (9.08)                                                |                                                               | 3, 4.78 (7.22)                              |

541

542 **Supplementary Table 4. Demographics for susceptibility modeling cohort**  
 543

|                                                | <b>COVID-19<br/>Nasopharyngeal<br/>Swab Test Positive</b> | <b>COVID-19<br/>Nasopharyngeal<br/>Swab Test<br/>Negative</b> | <b>Total<br/>Susceptibility<br/>modeling cohort<br/>(symptom data<br/>not required)</b> |
|------------------------------------------------|-----------------------------------------------------------|---------------------------------------------------------------|-----------------------------------------------------------------------------------------|
|                                                | <i>n</i> = 2,505                                          | <i>n</i> = 16,830                                             | <i>n</i> = 19,335                                                                       |
| <b>Age</b>                                     |                                                           |                                                               |                                                                                         |
| Median, mean (sd)                              | 48, 47.96 (14.68)                                         | 53, 52.93 (15.5)                                              | 53, 52.29 (15.49)                                                                       |
| <b>Bins (Counts, %)</b>                        |                                                           |                                                               |                                                                                         |
| 18-30                                          | 350 (0.14)                                                | 1404 (0.08)                                                   | 1754 (0.09)                                                                             |
| 31-40                                          | 531 (0.21)                                                | 2882 (0.17)                                                   | 3413 (0.18)                                                                             |
| 41-50                                          | 511 (0.2)                                                 | 3073 (0.18)                                                   | 3584 (0.19)                                                                             |
| 51-60                                          | 580 (0.23)                                                | 3478 (0.21)                                                   | 4058 (0.21)                                                                             |
| 61-70                                          | 365 (0.15)                                                | 3548 (0.21)                                                   | 3913 (0.20)                                                                             |
| 71-90                                          | 168 (0.07)                                                | 2445 (0.15)                                                   | 2613 (0.14)                                                                             |
| <b>Genetic Sex (counts, %)</b>                 |                                                           |                                                               |                                                                                         |
| Female                                         | 1646 (0.66)                                               | 11688 (0.69)                                                  | 13334 (0.69)                                                                            |
| Male                                           | 859 (0.34)                                                | 5142 (0.31)                                                   | 6001 (0.31)                                                                             |
| <b>Genetic Ancestry Continental Groupings</b>  |                                                           |                                                               |                                                                                         |
| Admixed African-European ancestry              | 130 (0.05)                                                | 730 (0.04)                                                    | 860 (0.04)                                                                              |
| Admixed Amerindian ancestry                    | 287 (0.11)                                                | 1319 (0.08)                                                   | 1606 (0.08)                                                                             |
| European ancestry                              | 1633 (0.65)                                               | 11886 (0.71)                                                  | 13519 (0.70)                                                                            |
| Other ancestry                                 | 455 (0.18)                                                | 2885 (0.17)                                                   | 3350 (0.17)                                                                             |
| <b>Pre-existing health conditions (any)</b>    | 1131 (0.45)                                               | 9168 (0.54)                                                   | 10299 (0.53)                                                                            |
| <b>BMI (med, mean, sd)</b>                     |                                                           |                                                               |                                                                                         |
| Total                                          | 28.7, 29.95 (7.16)                                        | 28.52, 29.88 (6.99)                                           | 28.73, 30.02 (7.08)                                                                     |
| <b>Underweight (count, %)</b>                  | <100                                                      | 111                                                           | 135                                                                                     |
| <b>Healthy (count, %)</b>                      | 629                                                       | 4051                                                          | 4680                                                                                    |
| <b>Overweight (count, %)</b>                   | 759                                                       | 5433                                                          | 6192                                                                                    |
| <b>Obese (count, %)</b>                        | 1069                                                      | 7012                                                          | 8081                                                                                    |
| <b>Flu</b>                                     |                                                           |                                                               |                                                                                         |
| Shot (yes)                                     | 1617 (0.65)                                               | 12029 (0.71)                                                  | 13646 (0.71)                                                                            |
| Test Dx (yes)                                  | 125 (0.05)                                                | 761 (0.05)                                                    | 886 (0.05)                                                                              |
| <b>Symptoms (tested pos.)</b>                  |                                                           |                                                               |                                                                                         |
| General, yes (count, % of pos.)                | 2254 (0.9)                                                | -                                                             | 2905 (0.45)                                                                             |
| <b>Hospitalization (count, % of positives)</b> |                                                           |                                                               |                                                                                         |
| Duration, days (med, mean, sd)                 | 5, 6.68 (8.46)                                            | -                                                             | 4.5, 6.42 (8.08)                                                                        |

544  
545

546 **Supplementary Table 5. Demographics for severity modeling cohort**  
 547

|                                                | <b>COVID-19<br/>Nasopharyngeal<br/>Swab Test Positive</b> |
|------------------------------------------------|-----------------------------------------------------------|
|                                                | <i>n</i> = 3,585                                          |
| <b>Age</b>                                     |                                                           |
| Median, mean (sd)                              | 49, 48.62 (14.68)                                         |
| <b>Bins (Counts, %)</b>                        |                                                           |
| 18-30                                          | 463 (0.13)                                                |
| 31-40                                          | 725 (0.2)                                                 |
| 41-50                                          | 748 (0.21)                                                |
| 51-60                                          | 832 (0.23)                                                |
| 61-70                                          | 555 (0.15)                                                |
| 71-90                                          | 262 (0.07)                                                |
| <b>Genetic Sex (counts, %)</b>                 |                                                           |
| Female                                         | 2303 (0.64)                                               |
| Male                                           | 1282 (0.36)                                               |
| <b>Genetic Ancestry Continental Groupings</b>  |                                                           |
| Admixed African-European ancestry              | 203 (0.06)                                                |
| Admixed Amerindian ancestry                    | 397 (0.11)                                                |
| European ancestry                              | 2317 (0.65)                                               |
| Other ancestry                                 | 668 (0.19)                                                |
| <b>Pre-existing health conditions (any)</b>    | 1666 (0.46)                                               |
| <b>BMI (med, mean, sd)</b>                     | 28.67, 29.83 (7.03)                                       |
| <b>Underweight (count, %)</b>                  | <100                                                      |
| <b>Healthy (count, %)</b>                      | 884                                                       |
| <b>Overweight (count, %)</b>                   | 1128                                                      |
| <b>Obese (count, %)</b>                        | 1498                                                      |
| <b>Flu</b>                                     |                                                           |
| Shot (yes)                                     | 2293 (0.64)                                               |
| Test Dx (yes)                                  | 174 (0.05)                                                |
| <b>Symptoms (tested pos.)</b>                  |                                                           |
| General, yes (count, % of pos.)                | 3236 (0.9)                                                |
| <b>Hospitalization (count, % of positives)</b> |                                                           |
| Duration, days (med, mean, sd)                 | 5, 7.34 (8.73)                                            |

548  
 549

550 **Supplementary Table 6. Demographics for susceptibility models with symptoms**

|                                                | <b>Susceptibility modeling cohort (with symptom data)</b> |
|------------------------------------------------|-----------------------------------------------------------|
|                                                | <i>n = 4,094</i>                                          |
| <b>Age</b>                                     |                                                           |
| Median, mean (sd)                              | 58, 55.7 (15.82)                                          |
| <b>Bins (Counts, %)</b>                        |                                                           |
| 18-30                                          | 293 (0.07)                                                |
| 31-40                                          | 567 (0.14)                                                |
| 41-50                                          | 641 (0.16)                                                |
| 51-60                                          | 795 (0.19)                                                |
| 61-70                                          | 982 (0.24)                                                |
| 71-90                                          | 816 (0.20)                                                |
| <b>Genetic Sex (counts, %)</b>                 |                                                           |
| Female                                         | 2744 (0.67)                                               |
| Male                                           | 1350 (0.33)                                               |
| <b>Genetic Ancestry Continental Groupings</b>  |                                                           |
| Admixed African-European ancestry              | 172 (0.04)                                                |
| Admixed Amerindian ancestry                    | 298 (0.07)                                                |
| European ancestry                              | 2927 (0.72)                                               |
| Other ancestry                                 | 666 (0.16)                                                |
| <b>Pre-existing health conditions (any)</b>    | 2205 (0.54)                                               |
| <b>BMI (med, mean, sd)</b>                     | 28.59, 29.8 (6.84)                                        |
| <b>Underweight (count, %)</b>                  | <100                                                      |
| <b>Healthy (count, %)</b>                      | 1007                                                      |
| <b>Overweight (count, %)</b>                   | 1335                                                      |
| <b>Obese (count, %)</b>                        | 1662                                                      |
| <b>Flu</b>                                     |                                                           |
| Shot (yes)                                     | 2935 (0.72)                                               |
| Test Dx (yes)                                  | 160 (0.04)                                                |
| <b>Symptoms (tested pos.)</b>                  |                                                           |
| General, yes (count, % of pos.)                | 1037 (0.25)                                               |
| <b>Hospitalization (count, % of positives)</b> |                                                           |
| Duration, days (med, mean, sd)                 | 5, 7.53 (10.11)                                           |

551

552

553 **Supplementary Table 7. Unadjusted risk factor odds ratios for COVID-19 susceptibility**

554

| RISK FACTOR                                     | ODDS RATIO (OR) | OR 95% CI (BONFERRONI) | logOR   | logOR S.E. | P-VALUE (NOMINAL) | P-VALUE (BONFERRONI) |
|-------------------------------------------------|-----------------|------------------------|---------|------------|-------------------|----------------------|
| <b>AGE</b>                                      |                 |                        |         |            |                   |                      |
| Ages 18-29                                      | 1.51            | (1.26, 1.81)           | 0.4108  | 0.0563     | 3.05E-13          | 1.28E-11             |
| Ages 30-49                                      | 1.10            | (0.97, 1.24)           | 0.0944  | 0.0377     | 1.22E-02          | 5.14E-01             |
| Ages 50-64                                      | 1.00            |                        | 0       |            | nan               | nan                  |
| Ages 65+                                        | 0.68            | (0.59, 0.79)           | -0.3819 | 0.0454     | 0.00E+00          | 0.00E+00             |
| <b>GENETIC ANCESTRY</b>                         |                 |                        |         |            |                   |                      |
| Admixed African-European                        | 1.48            | (1.18, 1.85)           | 0.3925  | 0.0694     | 1.57E-08          | 6.58E-07             |
| European                                        | 1.00            |                        | 0       |            | nan               | nan                  |
| Admixed Amerindian                              | 1.49            | (1.26, 1.77)           | 0.3995  | 0.0523     | 2.10E-14          | 8.82E-13             |
| Other                                           | 1.21            | (1.06, 1.38)           | 0.188   | 0.041      | 4.62E-06          | 1.94E-04             |
| <b>EXPOSURE</b>                                 |                 |                        |         |            |                   |                      |
| Any                                             | 8.72            | (7.42, 10.26)          | 2.1659  | 0.0501     | 0.00E+00          | 0.00E+00             |
| Biological relative tested positive             | 5.77            | (4.99, 6.68)           | 1.7529  | 0.045      | 0.00E+00          | 0.00E+00             |
| Directly exposed to someone who tested positive | 6.94            | (6.02, 7.99)           | 1.9366  | 0.0438     | 0.00E+00          | 0.00E+00             |
| Healthcare worker directly exposed              | 1.44            | (1.26, 1.65)           | 0.367   | 0.0408     | 2.31E-19          | 9.69E-18             |
| Household member tested positive                | 26.03           | (22.26, 30.43)         | 3.2591  | 0.0482     | 0.00E+00          | 0.00E+00             |
| <b>HEALTH CONDITIONS</b>                        |                 |                        |         |            |                   |                      |
| Asthma                                          | 0.81            | (0.71, 0.94)           | -0.2046 | 0.0446     | 4.55E-06          | 1.91E-04             |
| COPD (Chronic Obstructive Pulmonary Disease)    | 0.58            | (0.41, 0.82)           | -0.5374 | 0.1057     | 3.72E-07          | 1.56E-05             |
| Cancer treated in the past year                 | 0.53            | (0.36, 0.80)           | -0.6283 | 0.1237     | 3.80E-07          | 1.59E-05             |
| Cardiovascular disease                          | 0.71            | (0.56, 0.91)           | -0.3383 | 0.0762     | 9.12E-06          | 3.83E-04             |
| Chronic kidney disease                          | 0.54            | (0.33, 0.87)           | -0.6241 | 0.148      | 2.48E-05          | 1.04E-03             |
| Diabetes                                        | 0.86            | (0.71, 1.03)           | -0.1547 | 0.0561     | 5.79E-03          | 2.43E-01             |
| Hypertension                                    | 0.78            | (0.68, 0.89)           | -0.2522 | 0.0411     | 8.08E-10          | 3.40E-08             |
| Other                                           | 0.91            | (0.73, 1.13)           | -0.0939 | 0.0675     | 1.64E-01          | 1.00E+00             |
| Other autoimmune disease                        | 0.77            | (0.65, 0.92)           | -0.2571 | 0.054      | 1.95E-06          | 8.20E-05             |
| Other immunodeficiency disorder                 | 0.77            | (0.53, 1.14)           | -0.2552 | 0.1194     | 3.25E-02          | 1.00E+00             |
| Other lung condition                            | 0.59            | (0.42, 0.82)           | -0.5355 | 0.1037     | 2.45E-07          | 1.03E-05             |



|                                                  |      |              |         |        |           |           |
|--------------------------------------------------|------|--------------|---------|--------|-----------|-----------|
| <b>Any</b>                                       | 0.69 | (0.62, 0.77) | -0.3667 | 0.0336 | 0.00E+00  | 0.00E+00  |
| <b>OBESITY</b>                                   |      |              |         |        |           |           |
| <b>obesity I (BMI &gt;= 30 and BMI &lt; 35)</b>  | 0.99 | (0.86, 1.13) | -0.0146 | 0.043  | 7.35E-01  | 1.00E+00  |
| <b>obesity II (BMI &gt;= 35 and BMI &lt; 40)</b> | 1.00 | (0.83, 1.19) | -0.0042 | 0.056  | 9.41E-01  | 1.00E+00  |
| <b>obesity III (BMI &gt;= 40)</b>                | 0.97 | (0.80, 1.19) | -0.0255 | 0.0622 | 6.81E-01  | 1.00E+00  |
| <b>Not obese</b>                                 | 1.00 |              | 0       |        | nan       | nan       |
| <b>GENETIC SEX</b>                               |      |              |         |        |           |           |
| <b>Female</b>                                    | 1.00 |              | 0       |        | nan       | nan       |
| <b>Male</b>                                      | 1.27 | (1.14, 1.42) | 0.2419  | 0.0329 | 1.89E-13  | 7.95E-12  |
| <b>SYMPTOMS</b>                                  |      |              |         |        |           |           |
| <b>Abdominal pain</b>                            | 1.01 | (0.77, 1.33) | 0.0139  | 0.0841 | 8.69E-01  | 1.00E+00  |
| <b>Body aches</b>                                | 1.34 | (1.06, 1.69) | 0.2945  | 0.0717 | 4.04E-05  | 1.70E-03  |
| <b>Change in taste or smell</b>                  | 7.26 | (5.54, 9.50) | 1.9819  | 0.0832 | 1.62E-125 | 6.81E-124 |
| <b>Chills</b>                                    | 1.37 | (1.09, 1.71) | 0.3126  | 0.0697 | 7.23E-06  | 3.04E-04  |
| <b>Cough producing phlegm</b>                    | 0.88 | (0.69, 1.12) | -0.1318 | 0.0746 | 7.74E-02  | 1.00E+00  |
| <b>Diarrhea</b>                                  | 1.22 | (0.96, 1.56) | 0.2006  | 0.0745 | 7.11E-03  | 2.99E-01  |
| <b>Dry cough</b>                                 | 1.12 | (0.89, 1.40) | 0.109   | 0.0694 | 1.16E-01  | 1.00E+00  |
| <b>Feeling tired or fatigue</b>                  | 1.41 | (1.05, 1.89) | 0.343   | 0.0901 | 1.41E-04  | 5.91E-03  |
| <b>Fever</b>                                     | 1.60 | (1.28, 2.01) | 0.4715  | 0.0701 | 1.74E-11  | 7.30E-10  |
| <b>Headache</b>                                  | 1.12 | (0.88, 1.41) | 0.1098  | 0.0728 | 1.32E-01  | 1.00E+00  |
| <b>Nasal congestion</b>                          | 0.74 | (0.59, 0.92) | -0.3072 | 0.0696 | 1.01E-05  | 4.24E-04  |
| <b>Nausea or vomiting</b>                        | 0.99 | (0.75, 1.32) | -0.0055 | 0.0867 | 9.50E-01  | 1.00E+00  |
| <b>Runny nose</b>                                | 0.59 | (0.47, 0.75) | -0.5245 | 0.0725 | 4.49E-13  | 1.89E-11  |
| <b>Shortness of breath</b>                       | 1.14 | (0.91, 1.44) | 0.1343  | 0.0705 | 5.67E-02  | 1.00E+00  |
| <b>Sore throat</b>                               | 0.49 | (0.39, 0.62) | -0.7052 | 0.0717 | 8.10E-23  | 0.00E+00  |

555

556 Unadjusted odds ratios for a positive COVID-19 test were calculated among survey participants  
557 reporting a test result (positive or negative) based on the self-reported response to the following  
558 question: “Have you been swab tested for COVID-19, commonly referred to as coronavirus?”  
559 The following groups served as reference populations for the odds ratio calculations: European  
560 genetic ancestry (Genetic Ancestry), Ages 50-64 (Age), Female (Genetic Sex), and Not Obese  
561 (BMI < 30, Obesity). Note that symptoms odds ratios were calculated in a binary fashion among  
562 symptomatic customers only (Methods).

563 **Supplementary Table 8. Risk factors odds ratios for COVID-19 susceptibility, adjusted for**  
 564 **exposure questions**  
 565

| RISK FACTOR                                     | ODDS RATIO (OR) | OR 95% CI (BONFERRONI) | logOR   | logOR S.E. | P-VALUE (NOMINAL) | P-VALUE (BONFERRONI) |
|-------------------------------------------------|-----------------|------------------------|---------|------------|-------------------|----------------------|
| <b>AGE</b>                                      |                 |                        |         |            |                   |                      |
| Ages 18-29                                      | 1.27            | (1.02, 1.57)           | 0.2364  | 0.0670     | 4.22E-04          | 1.77E-02             |
| Ages 30-49                                      | 0.95            | (0.82, 1.10)           | -0.0535 | 0.0451     | 2.36E-01          | 1.00E+00             |
| Ages 50-64                                      | 1.00            |                        | 0.0000  |            | nan               | nan                  |
| Ages 65+                                        | 0.99            | (0.81, 1.21)           | -0.0084 | 0.0610     | 8.90E-01          | 1.00E+00             |
| <b>GENETIC ANCESTRY</b>                         |                 |                        |         |            |                   |                      |
| Admixed African-European                        | 1.23            | (0.94, 1.62)           | 0.2084  | 0.0848     | 1.40E-02          | 5.89E-01             |
| European                                        | 1.00            |                        | 0.0000  |            | nan               | nan                  |
| Admixed Amerindian                              | 1.32            | (1.08, 1.62)           | 0.2810  | 0.0621     | 6.13E-06          | 2.57E-04             |
| Other                                           | 1.10            | (0.93, 1.29)           | 0.0923  | 0.0504     | 6.73E-02          | 1.00E+00             |
| <b>EXPOSURE</b>                                 |                 |                        |         |            |                   |                      |
| Any                                             | 8.72            | (7.42, 10.26)          | 2.1659  | 0.0501     | 0.00E+00          | 0.00E+00             |
| Biological relative tested positive             | 5.77            | (4.99, 6.68)           | 1.7529  | 0.0450     | 0.00E+00          | 0.00E+00             |
| Directly exposed to someone who tested positive | 6.94            | (6.02, 7.99)           | 1.9366  | 0.0438     | 0.00E+00          | 0.00E+00             |
| Healthcare worker directly exposed              | 1.44            | (1.26, 1.65)           | 0.3670  | 0.0408     | 2.31E-19          | 9.69E-18             |
| Household member tested positive                | 26.03           | (22.26, 30.43)         | 3.2591  | 0.0482     | 0.00E+00          | 0.00E+00             |
| <b>HEALTH CONDITIONS</b>                        |                 |                        |         |            |                   |                      |
| Asthma                                          | 0.78            | (0.66, 0.93)           | -0.2450 | 0.0519     | 2.37E-06          | 9.95E-05             |
| COPD (Chronic Obstructive Pulmonary Disease)    | 0.85            | (0.57, 1.29)           | -0.1571 | 0.1276     | 2.18E-01          | 1.00E+00             |
| Cancer treated in the past year                 | 0.83            | (0.51, 1.34)           | -0.1884 | 0.1480     | 2.03E-01          | 1.00E+00             |
| Cardiovascular disease                          | 0.96            | (0.71, 1.29)           | -0.0436 | 0.0920     | 6.36E-01          | 1.00E+00             |
| Chronic kidney disease                          | 0.77            | (0.43, 1.37)           | -0.2656 | 0.1784     | 1.37E-01          | 1.00E+00             |
| Diabetes                                        | 1.09            | (0.88, 1.35)           | 0.0886  | 0.0657     | 1.78E-01          | 1.00E+00             |
| Hypertension                                    | 0.90            | (0.77, 1.05)           | -0.1034 | 0.0479     | 3.08E-02          | 1.00E+00             |
| Other                                           | 0.97            | (0.75, 1.25)           | -0.0293 | 0.0788     | 7.11E-01          | 1.00E+00             |
| Other autoimmune disease                        | 0.82            | (0.67, 1.00)           | -0.2042 | 0.0628     | 1.15E-03          | 4.85E-02             |
| Other immunodeficiency disorder                 | 0.69            | (0.43, 1.11)           | -0.3735 | 0.1482     | 1.18E-02          | 4.94E-01             |

|                                                  |      |              |         |        |          |          |
|--------------------------------------------------|------|--------------|---------|--------|----------|----------|
| <b>Other lung condition</b>                      | 0.66 | (0.44, 0.99) | -0.4166 | 0.1242 | 7.99E-04 | 3.36E-02 |
| <b>Any</b>                                       | 0.80 | (0.70, 0.91) | -0.2243 | 0.0391 | 9.55E-09 | 4.01E-07 |
| <b>OBESITY</b>                                   |      |              |         |        |          |          |
| <b>obesity I (BMI &gt;= 30 and BMI &lt; 35)</b>  | 0.99 | (0.84, 1.17) | -0.0079 | 0.0500 | 8.75E-01 | 1.00E+00 |
| <b>obesity II (BMI &gt;= 35 and BMI &lt; 40)</b> | 1.04 | (0.84, 1.28) | 0.0348  | 0.0647 | 5.90E-01 | 1.00E+00 |
| <b>obesity III (BMI &gt;= 40)</b>                | 0.99 | (0.79, 1.26) | -0.0056 | 0.0719 | 9.38E-01 | 1.00E+00 |
| <b>Not obese</b>                                 | 1.00 |              | 0.0000  |        | nan      | nan      |
| <b>GENETIC SEX</b>                               |      |              |         |        |          |          |
| <b>Female</b>                                    | 1.00 |              | 0.0000  |        | nan      | nan      |
| <b>Male</b>                                      | 1.35 | (1.18, 1.54) | 0.2989  | 0.0408 | 2.46E-13 | 1.04E-11 |
| <b>SYMPTOMS</b>                                  |      |              |         |        |          |          |
| <b>Abdominal pain</b>                            | 0.96 | (0.68, 1.38) | -0.0364 | 0.1100 | 7.41E-01 | 1.00E+00 |
| <b>Body aches</b>                                | 1.27 | (0.94, 1.73) | 0.2429  | 0.0934 | 9.31E-03 | 3.91E-01 |
| <b>Change in taste or smell</b>                  | 6.43 | (4.59, 9.00) | 1.8607  | 0.1039 | 1.18E-71 | 4.94E-70 |
| <b>Chills</b>                                    | 1.36 | (1.01, 1.82) | 0.3073  | 0.0908 | 7.11E-04 | 2.99E-02 |
| <b>Cough producing phlegm</b>                    | 0.89 | (0.64, 1.22) | -0.1208 | 0.0981 | 2.18E-01 | 1.00E+00 |
| <b>Diarrhea</b>                                  | 1.13 | (0.83, 1.55) | 0.1258  | 0.0963 | 1.92E-01 | 1.00E+00 |
| <b>Dry cough</b>                                 | 1.02 | (0.76, 1.37) | 0.0243  | 0.0906 | 7.88E-01 | 1.00E+00 |
| <b>Feeling tired or fatigue</b>                  | 1.27 | (0.87, 1.86) | 0.2389  | 0.1181 | 4.31E-02 | 1.00E+00 |
| <b>Fever</b>                                     | 1.53 | (1.14, 2.06) | 0.4276  | 0.0911 | 2.67E-06 | 1.12E-04 |
| <b>Headache</b>                                  | 1.01 | (0.74, 1.37) | 0.0092  | 0.0951 | 9.23E-01 | 1.00E+00 |
| <b>Nasal congestion</b>                          | 0.69 | (0.51, 0.92) | -0.3766 | 0.0909 | 3.45E-05 | 1.45E-03 |
| <b>Nausea or vomiting</b>                        | 0.92 | (0.64, 1.33) | -0.0808 | 0.1122 | 4.71E-01 | 1.00E+00 |
| <b>Runny nose</b>                                | 0.56 | (0.41, 0.76) | -0.5841 | 0.0954 | 9.02E-10 | 3.79E-08 |
| <b>Shortness of breath</b>                       | 1.26 | (0.93, 1.70) | 0.2286  | 0.0926 | 1.35E-02 | 5.68E-01 |
| <b>Sore throat</b>                               | 0.46 | (0.34, 0.63) | -0.7711 | 0.0940 | 2.22E-16 | 9.33E-15 |

566  
567 Adjusted odds ratios for a positive COVID-19 test were calculated among survey participants  
568 reporting a test result (positive or negative) based on the self-reported response to the following  
569 question: “Have you been swab tested for COVID-19, commonly referred to as coronavirus?”  
570 The following groups served as reference populations for the odds ratio calculations: European  
571 genetic ancestry (Genetic Ancestry), Ages 50-64 (Age), Female (Genetic Sex), and Not Obese  
572 (BMI < 30, Obesity). Note that symptoms odds ratios were calculated in a binary fashion among

573 symptomatic customers only (Methods). Here, odds ratios were adjusted for four known  
574 exposures (Y/N if any).  
575

576 **Supplementary Table 9. Risk factor odds ratios for COVID-19 susceptibility, adjusted for**  
 577 **exposure, age, and sex**  
 578

| RISK FACTOR                                     | ODDS RATIO (OR) | OR 95% CI (BONFERRONI) | logOR   | logOR S.E. | P-VALUE (NOMINAL) | P-VALUE (BONFERRONI) |
|-------------------------------------------------|-----------------|------------------------|---------|------------|-------------------|----------------------|
| <b>AGE</b>                                      |                 |                        |         |            |                   |                      |
| Ages 18-29                                      | 1.28            | (1.03, 1.59)           | 0.2448  | 0.0672     | 2.72E-04          | 1.14E-02             |
| Ages 30-49                                      | 0.94            | (0.81, 1.09)           | -0.0583 | 0.0453     | 1.97E-01          | 1.00E+00             |
| Ages 50-64                                      | 1.00            |                        | 0.0000  |            | nan               | nan                  |
| Ages 65+                                        | 0.96            | (0.79, 1.18)           | -0.0372 | 0.0613     | 5.44E-01          | 1.00E+00             |
| <b>GENETIC ANCESTRY</b>                         |                 |                        |         |            |                   |                      |
| Admixed African-European                        | 1.23            | (0.94, 1.62)           | 0.2091  | 0.0852     | 1.42E-02          | 5.95E-01             |
| European                                        | 1.00            |                        | 0.0000  |            | nan               | nan                  |
| Admixed Amerindian                              | 1.27            | (1.04, 1.57)           | 0.2417  | 0.0636     | 1.46E-04          | 6.11E-03             |
| Other                                           | 1.09            | (0.92, 1.29)           | 0.0863  | 0.0509     | 8.98E-02          | 1.00E+00             |
| <b>EXPOSURE</b>                                 |                 |                        |         |            |                   |                      |
| Any                                             | 8.63            | (7.31, 10.19)          | 2.1555  | 0.0512     | 0.00E+00          | 0.00E+00             |
| Biological relative tested positive             | 5.68            | (4.90, 6.58)           | 1.7372  | 0.0455     | 0.00E+00          | 0.00E+00             |
| Directly exposed to someone who tested positive | 6.71            | (5.80, 7.76)           | 1.9034  | 0.0451     | 0.00E+00          | 0.00E+00             |
| Healthcare worker directly exposed              | 1.33            | (1.16, 1.52)           | 0.2823  | 0.0420     | 1.75E-11          | 7.34E-10             |
| Household member tested positive                | 25.09           | (21.44, 29.36)         | 3.2224  | 0.0485     | 0.00E+00          | 0.00E+00             |
| <b>HEALTH CONDITIONS</b>                        |                 |                        |         |            |                   |                      |
| Asthma                                          | 0.82            | (0.69, 0.97)           | -0.2045 | 0.0524     | 9.47E-05          | 3.98E-03             |
| COPD (Chronic Obstructive Pulmonary Disease)    | 0.88            | (0.58, 1.34)           | -0.1281 | 0.1290     | 3.21E-01          | 1.00E+00             |
| Cancer treated in the past year                 | 0.83            | (0.51, 1.34)           | -0.1877 | 0.1488     | 2.07E-01          | 1.00E+00             |
| Cardiovascular disease                          | 0.94            | (0.69, 1.28)           | -0.0598 | 0.0944     | 5.27E-01          | 1.00E+00             |
| Chronic kidney disease                          | 0.78            | (0.44, 1.40)           | -0.2475 | 0.1791     | 1.67E-01          | 1.00E+00             |
| Diabetes                                        | 1.10            | (0.88, 1.36)           | 0.0922  | 0.0673     | 1.71E-01          | 1.00E+00             |
| Hypertension                                    | 0.90            | (0.76, 1.05)           | -0.1097 | 0.0499     | 2.80E-02          | 1.00E+00             |
| Other                                           | 0.99            | (0.77, 1.28)           | -0.0080 | 0.0790     | 9.20E-01          | 1.00E+00             |
| Other autoimmune disease                        | 0.87            | (0.71, 1.07)           | -0.1382 | 0.0636     | 2.97E-02          | 1.00E+00             |
| Other immunodeficiency disorder                 | 0.69            | (0.42, 1.11)           | -0.3764 | 0.1496     | 1.19E-02          | 4.99E-01             |

|                                                  |      |              |         |        |          |          |
|--------------------------------------------------|------|--------------|---------|--------|----------|----------|
| <b>Other lung condition</b>                      | 0.67 | (0.44, 1.00) | -0.4064 | 0.1248 | 1.13E-03 | 4.76E-02 |
| <b>Any</b>                                       | 0.81 | (0.71, 0.92) | -0.2092 | 0.0405 | 2.32E-07 | 9.76E-06 |
| <b>OBESITY</b>                                   |      |              |         |        |          |          |
| <b>obesity I (BMI &gt;= 30 and BMI &lt; 35)</b>  | 0.99 | (0.84, 1.16) | -0.0113 | 0.0502 | 8.23E-01 | 1.00E+00 |
| <b>obesity II (BMI &gt;= 35 and BMI &lt; 40)</b> | 1.04 | (0.84, 1.28) | 0.0390  | 0.0649 | 5.47E-01 | 1.00E+00 |
| <b>obesity III (BMI &gt;= 40)</b>                | 1.01 | (0.80, 1.28) | 0.0097  | 0.0724 | 8.94E-01 | 1.00E+00 |
| <b>Not obese</b>                                 | 1.00 |              | 0.0000  |        | nan      | nan      |
| <b>GENETIC SEX</b>                               |      |              |         |        |          |          |
| <b>Female</b>                                    | 1.00 |              | 0.0000  |        | nan      | nan      |
| <b>Male</b>                                      | 1.36 | (1.19, 1.55) | 0.3039  | 0.0409 | 1.09E-13 | 4.57E-12 |
| <b>SYMPTOMS</b>                                  |      |              |         |        |          |          |
| <b>Abdominal pain</b>                            | 1.00 | (0.70, 1.44) | 0.0048  | 0.1108 | 9.65E-01 | 1.00E+00 |
| <b>Body aches</b>                                | 1.29 | (0.95, 1.74) | 0.2508  | 0.0941 | 7.72E-03 | 3.24E-01 |
| <b>Change in taste or smell</b>                  | 6.68 | (4.75, 9.39) | 1.8991  | 0.1052 | 6.77E-73 | 2.84E-71 |
| <b>Chills</b>                                    | 1.35 | (1.01, 1.82) | 0.3014  | 0.0912 | 9.56E-04 | 4.02E-02 |
| <b>Cough producing phlegm</b>                    | 0.90 | (0.65, 1.23) | -0.1098 | 0.0986 | 2.65E-01 | 1.00E+00 |
| <b>Diarrhea</b>                                  | 1.16 | (0.85, 1.59) | 0.1522  | 0.0970 | 1.17E-01 | 1.00E+00 |
| <b>Dry cough</b>                                 | 1.05 | (0.78, 1.40) | 0.0442  | 0.0912 | 6.28E-01 | 1.00E+00 |
| <b>Feeling tired or fatigue</b>                  | 1.35 | (0.92, 2.00) | 0.3029  | 0.1202 | 1.17E-02 | 4.91E-01 |
| <b>Fever</b>                                     | 1.52 | (1.13, 2.05) | 0.4189  | 0.0916 | 4.76E-06 | 2.00E-04 |
| <b>Headache</b>                                  | 1.02 | (0.74, 1.40) | 0.0218  | 0.0977 | 8.24E-01 | 1.00E+00 |
| <b>Nasal congestion</b>                          | 0.69 | (0.52, 0.93) | -0.3651 | 0.0918 | 6.93E-05 | 2.91E-03 |
| <b>Nausea or vomiting</b>                        | 0.96 | (0.67, 1.38) | -0.0401 | 0.1128 | 7.22E-01 | 1.00E+00 |
| <b>Runny nose</b>                                | 0.57 | (0.42, 0.77) | -0.5690 | 0.0958 | 2.83E-09 | 1.19E-07 |
| <b>Shortness of breath</b>                       | 1.30 | (0.96, 1.76) | 0.2607  | 0.0934 | 5.22E-03 | 2.19E-01 |
| <b>Sore throat</b>                               | 0.47 | (0.34, 0.64) | -0.7609 | 0.0951 | 1.33E-15 | 5.60E-14 |

579  
580 Adjusted odds ratios for a positive COVID-19 test were calculated among survey participants  
581 reporting a test result (positive or negative) based on the self-reported response to the following  
582 question: “Have you been swab tested for COVID-19, commonly referred to as coronavirus?”  
583 The following groups served as reference populations for the odds ratio calculations: European  
584 genetic ancestry (Genetic Ancestry), Ages 50-64 (Age), Female (Genetic Sex), and Not Obese  
585 (BMI < 30, Obesity). Note that symptoms odds ratios were calculated in a binary fashion among

586 symptomatic customers only (Methods). Here, odds ratios were adjusted for four known  
587 exposures (Y/N if any), age, and genetic sex (Supplementary Table 2 and Methods).  
588  
589

590 **Supplementary Table 10. Unadjusted risk factor odds ratios for a known “direct” COVID-**  
 591 **19 exposure**

592

| RISK FACTOR                                  | ODDS RATIO (OR) | OR 95% CI (BONFERRONI) | logOR   | logOR S.E. | P-VALUE (NOMINAL) | P-VALUE (BONFERRONI) |
|----------------------------------------------|-----------------|------------------------|---------|------------|-------------------|----------------------|
| <b>AGE</b>                                   |                 |                        |         |            |                   |                      |
| Ages 18-29                                   | 1.80            | (1.54, 2.12)           | 0.5896  | 0.0519     | 6.64E-30          | 1.66E-28             |
| Ages 30-49                                   | 1.45            | (1.31, 1.60)           | 0.3725  | 0.0325     | 2.00E-30          | 5.00E-29             |
| Ages 50-64                                   | 1.00            |                        | 0.0000  |            | nan               | nan                  |
| Ages 65+                                     | 0.32            | (0.28, 0.37)           | -1.1427 | 0.0437     | 0.00E+00          | 0.00E+00             |
| <b>GENETIC ANCESTRY</b>                      |                 |                        |         |            |                   |                      |
| Admixed African-European                     | 1.49            | (1.23, 1.82)           | 0.4012  | 0.0639     | 3.32E-10          | 8.31E-09             |
| European                                     | 1.00            |                        | 0.0000  |            | nan               | nan                  |
| Admixed Amerindian                           | 1.40            | (1.21, 1.62)           | 0.3384  | 0.0476     | 1.13E-12          | 2.82E-11             |
| Other                                        | 1.17            | (1.05, 1.31)           | 0.1584  | 0.0365     | 1.47E-05          | 3.67E-04             |
| <b>EXPOSURE</b>                              |                 |                        |         |            |                   |                      |
| Biological relative tested positive          | 4.43            | (3.79, 5.18)           | 1.4888  | 0.0503     | 1.39E-192         | 3.48E-191            |
| Healthcare worker directly exposed           | 11.53           | (10.16, 13.08)         | 2.4450  | 0.0408     | 0.00E+00          | 0.00E+00             |
| Household member tested positive             | 22.53           | (17.88, 28.38)         | 3.1148  | 0.0747     | 0.00E+00          | 0.00E+00             |
| <b>HEALTH CONDITIONS</b>                     |                 |                        |         |            |                   |                      |
| Asthma                                       | 1.02            | (0.92, 1.14)           | 0.0216  | 0.0353     | 5.40E-01          | 1.00E+00             |
| COPD (Chronic Obstructive Pulmonary Disease) | 0.44            | (0.33, 0.57)           | -0.8297 | 0.0875     | 0.00E+00          | 0.00E+00             |
| Cancer treated in the past year              | 0.36            | (0.26, 0.49)           | -1.0310 | 0.1012     | 0.00E+00          | 0.00E+00             |
| Cardiovascular disease                       | 0.50            | (0.41, 0.61)           | -0.6880 | 0.0647     | 0.00E+00          | 0.00E+00             |
| Chronic kidney disease                       | 0.39            | (0.27, 0.57)           | -0.9295 | 0.1182     | 3.77E-15          | 9.44E-14             |
| Diabetes                                     | 0.63            | (0.54, 0.73)           | -0.4656 | 0.0473     | 0.00E+00          | 0.00E+00             |
| Hypertension                                 | 0.73            | (0.66, 0.81)           | -0.3181 | 0.0332     | 0.00E+00          | 0.00E+00             |
| Other                                        | 0.99            | (0.84, 1.18)           | -0.0080 | 0.0556     | 8.86E-01          | 1.00E+00             |
| Other autoimmune disease                     | 0.87            | (0.76, 0.99)           | -0.1421 | 0.0424     | 8.06E-04          | 2.02E-02             |
| Other immunodeficiency disorder              | 0.87            | (0.65, 1.17)           | -0.1389 | 0.0953     | 1.45E-01          | 1.00E+00             |
| Other lung condition                         | 0.62            | (0.48, 0.78)           | -0.4859 | 0.0778     | 4.22E-10          | 1.05E-08             |
| Any                                          | 0.71            | (0.65, 0.78)           | -0.3393 | 0.0276     | 0.00E+00          | 0.00E+00             |



| <b>OBESITY</b>                                   |      |              |         |        |          |          |
|--------------------------------------------------|------|--------------|---------|--------|----------|----------|
| <b>obesity I (BMI &gt;= 30 and BMI &lt; 35)</b>  | 1.03 | (0.93, 1.15) | 0.0338  | 0.0350 | 3.35E-01 | 1.00E+00 |
| <b>obesity II (BMI &gt;= 35 and BMI &lt; 40)</b> | 1.03 | (0.90, 1.19) | 0.0343  | 0.0456 | 4.52E-01 | 1.00E+00 |
| <b>obesity III (BMI &gt;= 40)</b>                | 1.10 | (0.94, 1.28) | 0.0927  | 0.0499 | 6.31E-02 | 1.00E+00 |
| <b>Not obese</b>                                 | 1.00 |              | 0.0000  |        | nan      | nan      |
| <b>GENETIC SEX</b>                               |      |              |         |        |          |          |
| <b>Female</b>                                    | 1.00 |              | 0.0000  |        | nan      | nan      |
| <b>Male</b>                                      | 0.96 | (0.87, 1.05) | -0.0443 | 0.0295 | 1.33E-01 | 1.00E+00 |

593  
 594 Unadjusted odds ratios for a known “direct” exposure to COVID-19 were calculated based on  
 595 the self-reported response to the following question: “Have you been directly exposed to  
 596 someone who has tested positive for COVID-19?” The following groups served as reference  
 597 populations for the odds ratio calculations: European genetic ancestry (Genetic Ancestry), Ages  
 598 50-64 (Age), Female (Genetic Sex), and Not Obese (BMI < 30, Obesity).

599  
 600  
 601  
 602  
 603  
 604  
 605  
 606  
 607  
 608  
 609  
 610  
 611  
 612

613 **Supplementary Table 11. Unadjusted risk factor odds ratios for a household case(s) of**  
 614 **COVID-19**

615

| RISK FACTOR                                     | ODDS RATIO (OR) | OR 95% CI (BONFERRONI) | logOR   | logOR S.E. | P-VALUE (NOMINAL) | P-VALUE (BONFERRONI) |
|-------------------------------------------------|-----------------|------------------------|---------|------------|-------------------|----------------------|
| <b>AGE</b>                                      |                 |                        |         |            |                   |                      |
| Ages 18-29                                      | 1.44            | (1.15, 1.79)           | 0.3623  | 0.0715     | 4.01E-07          | 1.00E-05             |
| Ages 30-49                                      | 0.98            | (0.84, 1.14)           | -0.0204 | 0.0488     | 6.76E-01          | 1.00E+00             |
| Ages 50-64                                      | 1.00            |                        | 0.0000  |            | nan               | nan                  |
| Ages 65+                                        | 0.50            | (0.41, 0.61)           | -0.6882 | 0.0641     | 0.00E+00          | 0.00E+00             |
| <b>GENETIC ANCESTRY</b>                         |                 |                        |         |            |                   |                      |
| Admixed African-European                        | 1.35            | (1.00, 1.81)           | 0.2971  | 0.0954     | 1.84E-03          | 4.60E-02             |
| European                                        | 1.00            |                        | 0.0000  |            | nan               | nan                  |
| Admixed Amerindian                              | 1.95            | (1.60, 2.37)           | 0.6686  | 0.0634     | 5.56E-26          | 1.39E-24             |
| Other                                           | 1.23            | (1.04, 1.47)           | 0.2107  | 0.0557     | 1.56E-04          | 3.90E-03             |
| <b>EXPOSURE</b>                                 |                 |                        |         |            |                   |                      |
| Biological relative tested positive             | 14.32           | (12.30, 16.67)         | 2.6615  | 0.0491     | 0.00E+00          | 0.00E+00             |
| Directly exposed to someone who tested positive | 22.53           | (17.88, 28.38)         | 3.1148  | 0.0747     | 0.00E+00          | 0.00E+00             |
| Healthcare worker directly exposed              | 1.11            | (0.94, 1.32)           | 0.1073  | 0.0540     | 4.71E-02          | 1.00E+00             |
| <b>HEALTH CONDITIONS</b>                        |                 |                        |         |            |                   |                      |
| Asthma                                          | 0.91            | (0.77, 1.07)           | -0.0975 | 0.0549     | 7.59E-02          | 1.00E+00             |
| COPD (Chronic Obstructive Pulmonary Disease)    | 0.58            | (0.38, 0.89)           | -0.5405 | 0.1363     | 7.31E-05          | 1.83E-03             |
| Cancer treated in the past year                 | 0.44            | (0.26, 0.75)           | -0.8217 | 0.1735     | 2.19E-06          | 5.48E-05             |
| Cardiovascular disease                          | 0.68            | (0.50, 0.93)           | -0.3795 | 0.0988     | 1.23E-04          | 3.07E-03             |
| Chronic kidney disease                          | 0.53            | (0.30, 0.97)           | -0.6255 | 0.1911     | 1.06E-03          | 2.66E-02             |
| Diabetes                                        | 0.89            | (0.72, 1.10)           | -0.1187 | 0.0701     | 9.02E-02          | 1.00E+00             |
| Hypertension                                    | 0.80            | (0.69, 0.94)           | -0.2182 | 0.0516     | 2.31E-05          | 5.77E-04             |
| Other                                           | 0.93            | (0.72, 1.21)           | -0.0673 | 0.0845     | 4.26E-01          | 1.00E+00             |
| Other autoimmune disease                        | 0.85            | (0.69, 1.04)           | -0.1684 | 0.0667     | 1.16E-02          | 2.90E-01             |
| Other immunodeficiency disorder                 | 0.87            | (0.56, 1.37)           | -0.1357 | 0.1453     | 3.50E-01          | 1.00E+00             |
| Other lung condition                            | 0.63            | (0.42, 0.94)           | -0.4620 | 0.1292     | 3.48E-04          | 8.70E-03             |
| Any                                             | 0.74            | (0.65, 0.84)           | -0.3047 | 0.0423     | 5.80E-13          | 1.45E-11             |

| <b>OBESITY</b>                                   |      |              |        |        |          |          |
|--------------------------------------------------|------|--------------|--------|--------|----------|----------|
| <b>obesity I (BMI &gt;= 30 and BMI &lt; 35)</b>  | 1.05 | (0.89, 1.23) | 0.0460 | 0.0533 | 3.88E-01 | 1.00E+00 |
| <b>obesity II (BMI &gt;= 35 and BMI &lt; 40)</b> | 1.01 | (0.81, 1.25) | 0.0064 | 0.0704 | 9.28E-01 | 1.00E+00 |
| <b>obesity III (BMI &gt;= 40)</b>                | 1.04 | (0.82, 1.32) | 0.0374 | 0.0769 | 6.27E-01 | 1.00E+00 |
| <b>Not obese</b>                                 | 1.00 |              | 0.0000 |        | nan      | nan      |
| <b>GENETIC SEX</b>                               |      |              |        |        |          |          |
| <b>Female</b>                                    | 1.00 |              | 0.0000 |        | nan      | nan      |
| <b>Male</b>                                      | 1.18 | (1.03, 1.36) | 0.1688 | 0.0438 | 1.16E-04 | 2.89E-03 |

616  
617 Unadjusted odds ratios for a household case(s) of COVID-19 were calculated based on the self-  
618 reported response to the following question: “Has someone in your household tested positive for  
619 COVID-19?” The following groups served as reference populations for the odds ratio  
620 calculations: European genetic ancestry (Genetic Ancestry), Ages 50-64 (Age), Female (Genetic  
621 Sex), and Not Obese (BMI < 30, Obesity).

622  
623  
624  
625  
626  
627  
628  
629  
630  
631  
632  
633  
634

635 **Supplementary Table 12. Unadjusted risk factor odds ratios for a COVID-19 case(s)**  
 636 **amongst close biological relatives (parent, grandparent, child, or sibling)**

637

| RISK FACTOR                                     | ODDS RATIO (OR) | OR 95% CI (BONFERRONI) | logOR   | logOR S.E. | P-VALUE (NOMINAL) | P-VALUE (BONFERRONI) |
|-------------------------------------------------|-----------------|------------------------|---------|------------|-------------------|----------------------|
| <b>AGE</b>                                      |                 |                        |         |            |                   |                      |
| Ages 18-29                                      | 1.48            | (1.18, 1.86)           | 0.3934  | 0.0730     | 7.16E-08          | 1.79E-06             |
| Ages 30-49                                      | 1.02            | (0.88, 1.19)           | 0.0222  | 0.0502     | 6.59E-01          | 1.00E+00             |
| Ages 50-64                                      | 1.00            |                        | 0.0000  |            | nan               | nan                  |
| Ages 65+                                        | 0.70            | (0.58, 0.85)           | -0.3523 | 0.0605     | 5.90E-09          | 1.47E-07             |
| <b>GENETIC ANCESTRY</b>                         |                 |                        |         |            |                   |                      |
| Admixed African-European                        | 1.69            | (1.28, 2.22)           | 0.5221  | 0.0896     | 5.62E-09          | 1.41E-07             |
| European                                        | 1.00            |                        | 0.0000  |            | nan               | nan                  |
| Admixed Amerindian                              | 2.08            | (1.71, 2.53)           | 0.7333  | 0.0634     | 5.85E-31          | 1.46E-29             |
| Other                                           | 1.42            | (1.20, 1.68)           | 0.3472  | 0.0547     | 2.14E-10          | 5.34E-09             |
| <b>EXPOSURE</b>                                 |                 |                        |         |            |                   |                      |
| Directly exposed to someone who tested positive | 4.43            | (3.79, 5.18)           | 1.4888  | 0.0503     | 1.39E-192         | 3.48E-191            |
| Healthcare worker directly exposed              | 1.04            | (0.87, 1.23)           | 0.0384  | 0.0558     | 4.91E-01          | 1.00E+00             |
| Household member tested positive                | 14.32           | (12.30, 16.67)         | 2.6615  | 0.0491     | 0.00E+00          | 0.00E+00             |
| <b>HEALTH CONDITIONS</b>                        |                 |                        |         |            |                   |                      |
| Asthma                                          | 0.98            | (0.82, 1.16)           | -0.0245 | 0.0547     | 6.54E-01          | 1.00E+00             |
| COPD (Chronic Obstructive Pulmonary Disease)    | 0.68            | (0.46, 1.02)           | -0.3791 | 0.1293     | 3.37E-03          | 8.42E-02             |
| Cancer treated in the past year                 | 0.60            | (0.37, 0.97)           | -0.5105 | 0.1542     | 9.33E-04          | 2.33E-02             |
| Cardiovascular disease                          | 0.77            | (0.57, 1.04)           | -0.2600 | 0.0959     | 6.72E-03          | 1.68E-01             |
| Chronic kidney disease                          | 0.52            | (0.28, 0.95)           | -0.6619 | 0.1977     | 8.12E-04          | 2.03E-02             |
| Diabetes                                        | 1.04            | (0.84, 1.28)           | 0.0368  | 0.0677     | 5.86E-01          | 1.00E+00             |
| Hypertension                                    | 0.88            | (0.75, 1.03)           | -0.1281 | 0.0513     | 1.25E-02          | 3.12E-01             |
| Other                                           | 1.03            | (0.80, 1.33)           | 0.0297  | 0.0829     | 7.20E-01          | 1.00E+00             |
| Other autoimmune disease                        | 0.90            | (0.73, 1.10)           | -0.1057 | 0.0663     | 1.11E-01          | 1.00E+00             |
| Other immunodeficiency disorder                 | 0.99            | (0.65, 1.53)           | -0.0065 | 0.1394     | 9.63E-01          | 1.00E+00             |
| Other lung condition                            | 0.96            | (0.69, 1.36)           | -0.0368 | 0.1104     | 7.39E-01          | 1.00E+00             |
| Any                                             | 0.85            | (0.74, 0.97)           | -0.1668 | 0.0429     | 1.02E-04          | 2.55E-03             |

| <b>OBESITY</b>                                   |      |              |         |        |          |          |
|--------------------------------------------------|------|--------------|---------|--------|----------|----------|
| <b>obesity I (BMI &gt;= 30 and BMI &lt; 35)</b>  | 1.03 | (0.87, 1.22) | 0.0327  | 0.0541 | 5.45E-01 | 1.00E+00 |
| <b>obesity II (BMI &gt;= 35 and BMI &lt; 40)</b> | 0.88 | (0.70, 1.11) | -0.1292 | 0.0748 | 8.41E-02 | 1.00E+00 |
| <b>obesity III (BMI &gt;= 40)</b>                | 1.10 | (0.87, 1.39) | 0.0945  | 0.0761 | 2.14E-01 | 1.00E+00 |
| <b>Not obese</b>                                 | 1.00 |              | 0.0000  |        | nan      | nan      |
| <b>GENETIC SEX</b>                               |      |              |         |        |          |          |
| <b>Female</b>                                    | 1.00 |              | 0.0000  |        | nan      | nan      |
| <b>Male</b>                                      | 0.87 | (0.75, 1.00) | -0.1404 | 0.0462 | 2.39E-03 | 5.99E-02 |

638  
639 Unadjusted odds ratios for a case(s) of COVID-19 among close biological relatives (grandparent,  
640 parent, child, or sibling) were calculated based on the self-reported response to the following  
641 question: “Have any of your biological relatives tested positive for COVID-19? Select all that  
642 apply.” The following groups served as reference populations for the odds ratio calculations:  
643 European genetic ancestry (Genetic Ancestry), Ages 50-64 (Age), Female (Genetic Sex), and  
644 Not Obese (BMI < 30, Obesity).

645  
646  
647  
648  
649  
650

651  
652  
653  
654  
655  
656  
657

658 **Supplementary Table 13. Unadjusted risk factor odds ratios for COVID-19 hospitalization**  
 659

| RISK FACTOR                                     | ODDS RATIO (OR) | OR 95% CI (BONFERRONI) | logOR   | logOR S.E. | P-VALUE (NOMINAL) | P-VALUE (BONFERRONI) |
|-------------------------------------------------|-----------------|------------------------|---------|------------|-------------------|----------------------|
| <b>AGE</b>                                      |                 |                        |         |            |                   |                      |
| Ages 18-29                                      | 0.42            | (0.21, 0.83)           | -0.8793 | 0.2143     | 4.06E-05          | 1.71E-03             |
| Ages 30-49                                      | 0.54            | (0.36, 0.81)           | -0.6143 | 0.1246     | 8.24E-07          | 3.46E-05             |
| Ages 50-64                                      | 1.00            |                        | 0.0000  |            | nan               | nan                  |
| Ages 65+                                        | 1.70            | (1.13, 2.56)           | 0.5325  | 0.1263     | 2.49E-05          | 1.05E-03             |
| <b>GENETIC ANCESTRY</b>                         |                 |                        |         |            |                   |                      |
| Admixed African-European                        | 1.44            | (0.78, 2.65)           | 0.3625  | 0.1884     | 5.43E-02          | 1.00E+00             |
| European                                        | 1.00            |                        | 0.0000  |            | nan               | nan                  |
| Admixed Amerindian                              | 0.77            | (0.44, 1.36)           | -0.2579 | 0.1745     | 1.39E-01          | 1.00E+00             |
| Other                                           | 0.91            | (0.59, 1.40)           | -0.0964 | 0.1335     | 4.70E-01          | 1.00E+00             |
| <b>EXPOSURE</b>                                 |                 |                        |         |            |                   |                      |
| Any                                             | 0.74            | (0.46, 1.19)           | -0.3048 | 0.1483     | 3.98E-02          | 1.00E+00             |
| Biological relative tested positive             | 1.17            | (0.81, 1.69)           | 0.1550  | 0.1136     | 1.73E-01          | 1.00E+00             |
| Directly exposed to someone who tested positive | 0.63            | (0.42, 0.96)           | -0.4595 | 0.1279     | 3.28E-04          | 1.38E-02             |
| Healthcare worker directly exposed              | 0.53            | (0.34, 0.84)           | -0.6317 | 0.1423     | 9.09E-06          | 3.82E-04             |
| Household member tested positive                | 0.91            | (0.65, 1.27)           | -0.0971 | 0.1033     | 3.47E-01          | 1.00E+00             |
| <b>HEALTH CONDITIONS</b>                        |                 |                        |         |            |                   |                      |
| Asthma                                          | 1.42            | (0.95, 2.13)           | 0.3525  | 0.1249     | 4.77E-03          | 2.00E-01             |
| COPD (Chronic Obstructive Pulmonary Disease)    | 3.48            | (1.65, 7.32)           | 1.2469  | 0.2296     | 5.64E-08          | 2.37E-06             |
| Cancer treated in the past year                 | 3.13            | (1.29, 7.57)           | 1.1396  | 0.2730     | 2.99E-05          | 1.26E-03             |
| Cardiovascular disease                          | 2.82            | (1.61, 4.96)           | 1.0374  | 0.1740     | 2.50E-09          | 1.05E-07             |
| Chronic kidney disease                          | 8.74            | (3.44, 22.21)          | 2.1684  | 0.2876     | 4.71E-14          | 1.98E-12             |
| Diabetes                                        | 3.03            | (1.98, 4.63)           | 1.1085  | 0.1311     | 2.78E-17          | 1.17E-15             |
| Hypertension                                    | 2.01            | (1.41, 2.88)           | 0.7002  | 0.1105     | 2.37E-10          | 9.96E-09             |
| Other                                           | 1.65            | (0.93, 2.93)           | 0.5038  | 0.1767     | 4.35E-03          | 1.83E-01             |
| Other autoimmune disease                        | 1.32            | (0.81, 2.17)           | 0.2811  | 0.1523     | 6.49E-02          | 1.00E+00             |
| Other immunodeficiency disorder                 | 1.98            | (0.77, 5.09)           | 0.6826  | 0.2915     | 1.92E-02          | 8.05E-01             |
| Other lung condition                            | 2.84            | (1.32, 6.10)           | 1.0423  | 0.2364     | 1.04E-05          | 4.35E-04             |

|                                                  |      |               |         |        |          |          |
|--------------------------------------------------|------|---------------|---------|--------|----------|----------|
| <b>Any</b>                                       | 2.70 | (1.90, 3.83)  | 0.9919  | 0.1081 | 4.43E-20 | 1.86E-18 |
| <b>OBESITY</b>                                   |      |               |         |        |          |          |
| <b>obesity I (BMI &gt;= 30 and BMI &lt; 35)</b>  | 1.41 | (0.94, 2.12)  | 0.3418  | 0.1258 | 6.61E-03 | 2.78E-01 |
| <b>obesity II (BMI &gt;= 35 and BMI &lt; 40)</b> | 1.21 | (0.70, 2.09)  | 0.1883  | 0.1693 | 2.66E-01 | 1.00E+00 |
| <b>obesity III (BMI &gt;= 40)</b>                | 1.62 | (0.93, 2.83)  | 0.4820  | 0.1719 | 5.04E-03 | 2.12E-01 |
| <b>Not obese</b>                                 | 1.00 |               | 0.0000  |        | nan      | nan      |
| <b>GENETIC SEX</b>                               |      |               |         |        |          |          |
| <b>Female</b>                                    | 1.00 |               | 0.0000  |        | nan      | nan      |
| <b>Male</b>                                      | 1.27 | (0.92, 1.77)  | 0.2418  | 0.1015 | 1.72E-02 | 7.22E-01 |
| <b>SYMPTOMS</b>                                  |      |               |         |        |          |          |
| <b>Abdominal pain</b>                            | 1.76 | (1.23, 2.52)  | 0.5638  | 0.1112 | 3.92E-07 | 1.65E-05 |
| <b>Body aches</b>                                | 1.39 | (0.96, 2.02)  | 0.3309  | 0.1142 | 3.75E-03 | 1.57E-01 |
| <b>Change in taste or smell</b>                  | 0.77 | (0.55, 1.07)  | -0.2657 | 0.1039 | 1.05E-02 | 4.42E-01 |
| <b>Chills</b>                                    | 1.82 | (1.29, 2.57)  | 0.5991  | 0.1061 | 1.65E-08 | 6.92E-07 |
| <b>Cough producing phlegm</b>                    | 1.56 | (1.11, 2.20)  | 0.4474  | 0.1054 | 2.19E-05 | 9.18E-04 |
| <b>Diarrhea</b>                                  | 2.12 | (1.52, 2.95)  | 0.7521  | 0.1021 | 1.75E-13 | 7.35E-12 |
| <b>Dry cough</b>                                 | 2.59 | (1.81, 3.71)  | 0.9528  | 0.1104 | 6.26E-18 | 2.63E-16 |
| <b>Feeling tired or fatigue</b>                  | 2.54 | (1.35, 4.78)  | 0.9335  | 0.1949 | 1.68E-06 | 7.04E-05 |
| <b>Fever</b>                                     | 3.33 | (2.26, 4.90)  | 1.2032  | 0.1192 | 5.93E-24 | 2.49E-22 |
| <b>Headache</b>                                  | 0.89 | (0.63, 1.26)  | -0.1125 | 0.1063 | 2.90E-01 | 1.00E+00 |
| <b>Nasal congestion</b>                          | 0.94 | (0.67, 1.31)  | -0.0610 | 0.1030 | 5.54E-01 | 1.00E+00 |
| <b>Nausea or vomiting</b>                        | 2.26 | (1.58, 3.23)  | 0.8156  | 0.1104 | 1.52E-13 | 6.39E-12 |
| <b>Runny nose</b>                                | 1.09 | (0.76, 1.56)  | 0.0831  | 0.1118 | 4.57E-01 | 1.00E+00 |
| <b>Shortness of breath</b>                       | 7.52 | (4.92, 11.49) | 2.0172  | 0.1309 | 1.48E-53 | 6.21E-52 |
| <b>Sore throat</b>                               | 1.04 | (0.72, 1.50)  | 0.0386  | 0.1127 | 7.32E-01 | 1.00E+00 |

660

661 Unadjusted odds ratios for hospitalization due to COVID-19 infection were calculated among  
662 those reporting a positive COVID-19 test result. The following groups served as reference  
663 populations for the odds ratio calculations: European genetic ancestry (Genetic Ancestry), Ages  
664 50-64 (Age), Female (Genetic Sex), and Not Obese (BMI < 30, Obesity). Note that symptoms  
665 odds ratios were calculated in a binary fashion among symptomatic customers only (Methods).  
666

667 **Supplementary Table 14. Risk factor odds ratios for COVID-19 hospitalization, adjusted**  
 668 **for health conditions, obesity, age, and sex**  
 669

| RISK FACTOR                                     | ODDS RATIO (OR) | OR 95% CI (BONFERRONI) | logOR   | logOR S.E. | P-VALUE (NOMINAL) | P-VALUE (BONFERRONI) |
|-------------------------------------------------|-----------------|------------------------|---------|------------|-------------------|----------------------|
| <b>AGE</b>                                      |                 |                        |         |            |                   |                      |
| Ages 18-29                                      | 0.56            | (0.26, 1.20)           | -0.5815 | 0.2359     | 1.37E-02          | 5.75E-01             |
| Ages 30-49                                      | 0.60            | (0.39, 0.92)           | -0.5110 | 0.1333     | 1.26E-04          | 5.28E-03             |
| Ages 50-64                                      | 1.00            |                        | 0.0000  |            | nan               | nan                  |
| Ages 65+                                        | 1.60            | (1.02, 2.51)           | 0.4713  | 0.1381     | 6.43E-04          | 2.70E-02             |
| <b>GENETIC ANCESTRY</b>                         |                 |                        |         |            |                   |                      |
| Admixed African-European                        | 1.57            | (0.81, 3.03)           | 0.4513  | 0.2026     | 2.59E-02          | 1.00E+00             |
| European                                        | 1.00            |                        | 0.0000  |            | nan               | nan                  |
| Admixed Amerindian                              | 1.11            | (0.59, 2.07)           | 0.1035  | 0.1922     | 5.90E-01          | 1.00E+00             |
| Other                                           | 0.95            | (0.59, 1.54)           | -0.0493 | 0.1490     | 7.41E-01          | 1.00E+00             |
| <b>EXPOSURE</b>                                 |                 |                        |         |            |                   |                      |
| Any                                             | 0.81            | (0.48, 1.39)           | -0.2060 | 0.1653     | 2.13E-01          | 1.00E+00             |
| Biological relative tested positive             | 1.16            | (0.78, 1.74)           | 0.1498  | 0.1248     | 2.30E-01          | 1.00E+00             |
| Directly exposed to someone who tested positive | 0.68            | (0.43, 1.07)           | -0.3870 | 0.1397     | 5.61E-03          | 2.36E-01             |
| Healthcare worker directly exposed              | 0.63            | (0.38, 1.04)           | -0.4685 | 0.1567     | 2.79E-03          | 1.17E-01             |
| Household member tested positive                | 0.88            | (0.62, 1.26)           | -0.1245 | 0.1109     | 2.62E-01          | 1.00E+00             |
| <b>HEALTH CONDITIONS</b>                        |                 |                        |         |            |                   |                      |
| Asthma                                          | 1.42            | (0.92, 2.20)           | 0.3537  | 0.1343     | 8.42E-03          | 3.54E-01             |
| COPD (Chronic Obstructive Pulmonary Disease)    | 2.25            | (0.99, 5.14)           | 0.8123  | 0.2542     | 1.40E-03          | 5.87E-02             |
| Cancer treated in the past year                 | 1.90            | (0.72, 5.04)           | 0.6422  | 0.3012     | 3.30E-02          | 1.00E+00             |
| Cardiovascular disease                          | 1.67            | (0.90, 3.11)           | 0.5139  | 0.1914     | 7.24E-03          | 3.04E-01             |
| Chronic kidney disease                          | 5.62            | (2.10, 15.03)          | 1.7267  | 0.3034     | 1.26E-08          | 5.30E-07             |
| Diabetes                                        | 2.22            | (1.39, 3.55)           | 0.7988  | 0.1442     | 3.06E-08          | 1.28E-06             |
| Hypertension                                    | 1.32            | (0.88, 1.97)           | 0.2757  | 0.1239     | 2.61E-02          | 1.00E+00             |
| Other                                           | 1.47            | (0.80, 2.71)           | 0.3878  | 0.1875     | 3.86E-02          | 1.00E+00             |
| Other autoimmune disease                        | 1.41            | (0.83, 2.40)           | 0.3461  | 0.1635     | 3.42E-02          | 1.00E+00             |
| Other immunodeficiency disorder                 | 1.83            | (0.68, 4.93)           | 0.6032  | 0.3062     | 4.88E-02          | 1.00E+00             |



|                                                  |      |               |         |        |          |          |
|--------------------------------------------------|------|---------------|---------|--------|----------|----------|
| <b>Other lung condition</b>                      | 1.87 | (0.83, 4.22)  | 0.6242  | 0.2514 | 1.30E-02 | 5.47E-01 |
| <b>Any</b>                                       | 2.08 | (1.42, 3.04)  | 0.7333  | 0.1172 | 3.93E-10 | 1.65E-08 |
| <b>OBESITY</b>                                   |      |               |         |        |          |          |
| <b>obesity I (BMI &gt;= 30 and BMI &lt; 35)</b>  | 1.19 | (0.77, 1.82)  | 0.1707  | 0.1323 | 1.97E-01 | 1.00E+00 |
| <b>obesity II (BMI &gt;= 35 and BMI &lt; 40)</b> | 1.13 | (0.64, 2.00)  | 0.1249  | 0.1750 | 4.75E-01 | 1.00E+00 |
| <b>obesity III (BMI &gt;= 40)</b>                | 1.59 | (0.88, 2.87)  | 0.4631  | 0.1821 | 1.10E-02 | 4.62E-01 |
| <b>Not obese</b>                                 | 1.00 |               | 0.0000  |        | nan      | nan      |
| <b>GENETIC SEX</b>                               |      |               |         |        |          |          |
| <b>Female</b>                                    | 1.00 |               | 0.0000  |        | nan      | nan      |
| <b>Male</b>                                      | 1.22 | (0.85, 1.74)  | 0.1960  | 0.1103 | 7.57E-02 | 1.00E+00 |
| <b>SYMPTOMS</b>                                  |      |               |         |        |          |          |
| <b>Abdominal pain</b>                            | 1.66 | (1.12, 2.46)  | 0.5086  | 0.1214 | 2.81E-05 | 1.18E-03 |
| <b>Body aches</b>                                | 1.44 | (0.96, 2.15)  | 0.3646  | 0.1240 | 3.27E-03 | 1.37E-01 |
| <b>Change in taste or smell</b>                  | 0.89 | (0.62, 1.29)  | -0.1159 | 0.1139 | 3.09E-01 | 1.00E+00 |
| <b>Chills</b>                                    | 1.94 | (1.33, 2.82)  | 0.6609  | 0.1156 | 1.07E-08 | 4.51E-07 |
| <b>Cough producing phlegm</b>                    | 1.41 | (0.97, 2.05)  | 0.3470  | 0.1150 | 2.54E-03 | 1.07E-01 |
| <b>Diarrhea</b>                                  | 2.23 | (1.55, 3.20)  | 0.8014  | 0.1120 | 8.21E-13 | 3.45E-11 |
| <b>Dry cough</b>                                 | 2.49 | (1.69, 3.67)  | 0.9114  | 0.1196 | 2.55E-14 | 1.07E-12 |
| <b>Feeling tired or fatigue</b>                  | 2.81 | (1.38, 5.74)  | 1.0333  | 0.2203 | 2.73E-06 | 1.15E-04 |
| <b>Fever</b>                                     | 3.49 | (2.29, 5.34)  | 1.2510  | 0.1309 | 1.24E-21 | 5.19E-20 |
| <b>Headache</b>                                  | 1.05 | (0.72, 1.54)  | 0.0487  | 0.1180 | 6.80E-01 | 1.00E+00 |
| <b>Nasal congestion</b>                          | 0.93 | (0.65, 1.34)  | -0.0698 | 0.1122 | 5.34E-01 | 1.00E+00 |
| <b>Nausea or vomiting</b>                        | 2.41 | (1.62, 3.59)  | 0.8801  | 0.1230 | 8.38E-13 | 3.52E-11 |
| <b>Runny nose</b>                                | 0.93 | (0.62, 1.39)  | -0.0710 | 0.1232 | 5.65E-01 | 1.00E+00 |
| <b>Shortness of breath</b>                       | 8.20 | (5.14, 13.08) | 2.1042  | 0.1440 | 2.37E-48 | 9.96E-47 |
| <b>Sore throat</b>                               | 1.11 | (0.75, 1.66)  | 0.1074  | 0.1224 | 3.80E-01 | 1.00E+00 |

670  
671 Adjusted odds ratios for hospitalization due to COVID-19 infection were calculated among those  
672 reporting a positive COVID-19 test result. The following groups served as reference populations  
673 for the odds ratio calculations: European genetic ancestry (Genetic Ancestry), Ages 50-64 (Age),  
674 Female (Genetic Sex), and Not Obese (BMI < 30, Obesity). Note that symptoms odds ratios  
675 were calculated in a binary fashion among symptomatic customers only (Methods). Here, odds  
676 ratios were adjusted for age, sex, comorbidities (Y/N if any), and obesity (Y/N if BMI > 30,  
677 Methods).  
678

679 **Supplementary Table 15. Unadjusted risk factor odds ratios for progression of COVID-19**  
 680 **to a critical case.**  
 681

| RISK FACTOR                                     | ODDS RATIO (OR) | OR 95% CI (BONFERRONI) | logOR   | logOR S.E. | P-VALUE (NOMINAL) | P-VALUE (BONFERRONI) |
|-------------------------------------------------|-----------------|------------------------|---------|------------|-------------------|----------------------|
| <b>AGE</b>                                      |                 |                        |         |            |                   |                      |
| Ages 18-29                                      | 0.35            | (0.13, 0.95)           | -1.0599 | 0.3114     | 6.64E-04          | 2.79E-02             |
| Ages 30-49                                      | 0.55            | (0.32, 0.94)           | -0.5983 | 0.1652     | 2.92E-04          | 1.23E-02             |
| Ages 50-64                                      | 1               |                        | 0       |            | nan               | nan                  |
| Ages 65+                                        | 1.65            | (0.97, 2.80)           | 0.5001  | 0.1632     | 2.19E-03          | 9.18E-02             |
| <b>GENETIC ANCESTRY</b>                         |                 |                        |         |            |                   |                      |
| Admixed African-European                        | 2.07            | (1.03, 4.17)           | 0.7269  | 0.2166     | 7.91E-04          | 3.32E-02             |
| European                                        | 1               |                        | 0       |            | nan               | nan                  |
| Admixed Amerindian                              | 0.75            | (0.35, 1.62)           | -0.2871 | 0.2377     | 2.27E-01          | 1.00E+00             |
| Other                                           | 0.82            | (0.45, 1.49)           | -0.2044 | 0.1853     | 2.70E-01          | 1.00E+00             |
| <b>EXPOSURE</b>                                 |                 |                        |         |            |                   |                      |
| Any                                             | 0.77            | (0.40, 1.45)           | -0.2675 | 0.1981     | 1.77E-01          | 1.00E+00             |
| Biological relative tested positive             | 1.15            | (0.70, 1.86)           | 0.1356  | 0.1502     | 3.67E-01          | 1.00E+00             |
| Directly exposed to someone who tested positive | 0.59            | (0.34, 1.01)           | -0.5348 | 0.1691     | 1.56E-03          | 6.55E-02             |
| Healthcare worker directly exposed              | 0.53            | (0.29, 0.99)           | -0.6277 | 0.1912     | 1.03E-03          | 4.31E-02             |
| Household member tested positive                | 1.00            | (0.64, 1.55)           | -0.0001 | 0.1353     | 1.00E+00          | 1.00E+00             |
| <b>HEALTH CONDITIONS</b>                        |                 |                        |         |            |                   |                      |
| Asthma                                          | 1.26            | (0.74, 2.17)           | 0.235   | 0.1672     | 1.60E-01          | 1.00E+00             |
| COPD (Chronic Obstructive Pulmonary Disease)    | 3.76            | (1.57, 9.02)           | 1.3257  | 0.2696     | 8.79E-07          | 3.69E-05             |
| Cancer treated in the past year                 | 2.07            | (0.60, 7.12)           | 0.7266  | 0.3814     | 5.68E-02          | 1.00E+00             |
| Cardiovascular disease                          | 2.44            | (1.17, 5.05)           | 0.8906  | 0.2251     | 7.60E-05          | 3.19E-03             |
| Chronic kidney disease                          | 8.00            | (2.92, 21.91)          | 2.0794  | 0.3109     | 2.26E-11          | 9.47E-10             |
| Diabetes                                        | 3.14            | (1.85, 5.32)           | 1.1431  | 0.1629     | 2.29E-12          | 9.61E-11             |
| Hypertension                                    | 2.06            | (1.30, 3.27)           | 0.7214  | 0.1425     | 4.15E-07          | 1.74E-05             |
| Other                                           | 1.07            | (0.45, 2.54)           | 0.0649  | 0.2674     | 8.08E-01          | 1.00E+00             |
| Other autoimmune disease                        | 1.35            | (0.71, 2.55)           | 0.2973  | 0.1973     | 1.32E-01          | 1.00E+00             |
| Other immunodeficiency disorder                 | 1.81            | (0.53, 6.16)           | 0.5907  | 0.3788     | 1.19E-01          | 1.00E+00             |

|                                                  |       |               |         |        |          |          |
|--------------------------------------------------|-------|---------------|---------|--------|----------|----------|
| <b>Other lung condition</b>                      | 3.29  | (1.35, 8.00)  | 1.1909  | 0.274  | 1.39E-05 | 5.82E-04 |
| <b>Any</b>                                       | 2.85  | (1.78, 4.57)  | 1.0485  | 0.1452 | 5.22E-13 | 2.19E-11 |
| <b>OBESITY</b>                                   |       |               |         |        |          |          |
| <b>obesity I (BMI &gt;= 30 and BMI &lt; 35)</b>  | 1.31  | (0.76, 2.27)  | 0.2714  | 0.1696 | 1.09E-01 | 1.00E+00 |
| <b>obesity II (BMI &gt;= 35 and BMI &lt; 40)</b> | 1.16  | (0.56, 2.43)  | 0.1525  | 0.2275 | 5.03E-01 | 1.00E+00 |
| <b>obesity III (BMI &gt;= 40)</b>                | 2.06  | (1.05, 4.02)  | 0.7211  | 0.2071 | 4.98E-04 | 2.09E-02 |
| <b>Not obese</b>                                 | 1     |               | 0       |        | nan      | nan      |
| <b>GENETIC SEX</b>                               |       |               |         |        |          |          |
| <b>Female</b>                                    | 1     |               | 0       |        | nan      | nan      |
| <b>Male</b>                                      | 1.54  | (1.00, 2.37)  | 0.4342  | 0.1325 | 1.05E-03 | 4.42E-02 |
| <b>SYMPTOMS</b>                                  |       |               |         |        |          |          |
| <b>Abdominal pain</b>                            | 1.95  | (1.23, 3.08)  | 0.666   | 0.1413 | 2.45E-06 | 1.03E-04 |
| <b>Body aches</b>                                | 1.58  | (0.95, 2.60)  | 0.4547  | 0.1546 | 3.27E-03 | 1.37E-01 |
| <b>Change in taste or smell</b>                  | 0.79  | (0.51, 1.23)  | -0.2319 | 0.1358 | 8.79E-02 | 1.00E+00 |
| <b>Chills</b>                                    | 2.04  | (1.28, 3.23)  | 0.7106  | 0.1423 | 5.96E-07 | 2.50E-05 |
| <b>Cough producing phlegm</b>                    | 1.83  | (1.18, 2.84)  | 0.6063  | 0.1351 | 7.24E-06 | 3.04E-04 |
| <b>Diarrhea</b>                                  | 2.48  | (1.61, 3.84)  | 0.9102  | 0.1339 | 1.08E-11 | 4.53E-10 |
| <b>Dry cough</b>                                 | 2.67  | (1.66, 4.31)  | 0.9836  | 0.1474 | 2.49E-11 | 1.04E-09 |
| <b>Feeling tired or fatigue</b>                  | 2.55  | (1.09, 5.97)  | 0.9344  | 0.2628 | 3.77E-04 | 1.58E-02 |
| <b>Fever</b>                                     | 3.52  | (2.08, 5.96)  | 1.2595  | 0.1622 | 8.00E-15 | 3.36E-13 |
| <b>Headache</b>                                  | 0.97  | (0.61, 1.52)  | -0.0356 | 0.1402 | 8.00E-01 | 1.00E+00 |
| <b>Nasal congestion</b>                          | 1.06  | (0.69, 1.64)  | 0.0592  | 0.1337 | 6.58E-01 | 1.00E+00 |
| <b>Nausea or vomiting</b>                        | 2.27  | (1.44, 3.60)  | 0.8217  | 0.1415 | 6.30E-09 | 2.64E-07 |
| <b>Runny nose</b>                                | 1.31  | (0.83, 2.07)  | 0.2696  | 0.1415 | 5.68E-02 | 1.00E+00 |
| <b>Shortness of breath</b>                       | 11.55 | (5.91, 22.59) | 2.4466  | 0.2069 | 2.93E-32 | 1.23E-30 |
| <b>Sore throat</b>                               | 1.45  | (0.92, 2.29)  | 0.374   | 0.1396 | 7.40E-03 | 3.11E-01 |

682  
683 Unadjusted odds ratios for progression of COVID-19 infection to a critical, life-threatening  
684 illness were calculated among those reporting a positive COVID-19 test result. The following  
685 groups served as reference populations for the odds ratio calculations: European genetic ancestry  
686 (Genetic Ancestry), Ages 50-64 (Age), Female (Genetic Sex), and Not Obese (BMI < 30,  
687 Obesity). Note that symptoms odds ratios were calculated in a binary fashion among  
688 symptomatic customers only (Methods).  
689

690 **Supplementary Table 16. Risk factor odds ratios for progression of COVID-19 to a critical**  
 691 **case, adjusted for health conditions, obesity, age, and sex.**

692

| RISK FACTOR                                     | ODDS RATIO (OR) | OR 95% CI (BONFERRONI) | logOR   | logOR S.E. | P-VALUE (NOMINAL) | P-VALUE (BONFERRONI) |
|-------------------------------------------------|-----------------|------------------------|---------|------------|-------------------|----------------------|
| <b>AGE</b>                                      |                 |                        |         |            |                   |                      |
| Ages 18-29                                      | 0.46            | (0.15, 1.45)           | -0.7675 | 0.3506     | 2.86E-02          | 1.00E+00             |
| Ages 30-49                                      | 0.67            | (0.38, 1.17)           | -0.4033 | 0.1735     | 2.01E-02          | 8.45E-01             |
| Ages 50-64                                      | 1               |                        | 0       |            | nan               | nan                  |
| Ages 65+                                        | 1.51            | (0.85, 2.69)           | 0.41    | 0.1785     | 2.16E-02          | 9.07E-01             |
| <b>GENETIC ANCESTRY</b>                         |                 |                        |         |            |                   |                      |
| Admixed African-European                        | 2.34            | (1.11, 4.95)           | 0.8516  | 0.2308     | 2.25E-04          | 9.43E-03             |
| European                                        | 1               |                        | 0       |            | nan               | nan                  |
| Admixed Amerindian                              | 1.12            | (0.49, 2.56)           | 0.1145  | 0.2548     | 6.53E-01          | 1.00E+00             |
| Other                                           | 0.85            | (0.44, 1.65)           | -0.164  | 0.206      | 4.26E-01          | 1.00E+00             |
| <b>EXPOSURE</b>                                 |                 |                        |         |            |                   |                      |
| Any                                             | 0.83            | (0.41, 1.67)           | -0.1862 | 0.2163     | 3.89E-01          | 1.00E+00             |
| Biological relative tested positive             | 1.23            | (0.73, 2.08)           | 0.2104  | 0.1609     | 1.91E-01          | 1.00E+00             |
| Directly exposed to someone who tested positive | 0.62            | (0.34, 1.13)           | -0.4747 | 0.183      | 9.49E-03          | 3.98E-01             |
| Healthcare worker directly exposed              | 0.62            | (0.31, 1.24)           | -0.4703 | 0.2116     | 2.63E-02          | 1.00E+00             |
| Household member tested positive                | 1.01            | (0.63, 1.60)           | 0.0068  | 0.1434     | 9.62E-01          | 1.00E+00             |
| <b>HEALTH CONDITIONS</b>                        |                 |                        |         |            |                   |                      |
| Asthma                                          | 1.24            | (0.69, 2.22)           | 0.2124  | 0.1806     | 2.40E-01          | 1.00E+00             |
| COPD (Chronic Obstructive Pulmonary Disease)    | 2.39            | (0.90, 6.36)           | 0.8704  | 0.302      | 3.95E-03          | 1.66E-01             |
| Cancer treated in the past year                 | 1.08            | (0.26, 4.55)           | 0.0784  | 0.4429     | 8.59E-01          | 1.00E+00             |
| Cardiovascular disease                          | 1.42            | (0.64, 3.15)           | 0.3485  | 0.2469     | 1.58E-01          | 1.00E+00             |
| Chronic kidney disease                          | 4.88            | (1.67, 14.30)          | 1.586   | 0.3314     | 1.70E-06          | 7.13E-05             |
| Diabetes                                        | 2.16            | (1.20, 3.89)           | 0.7699  | 0.1816     | 2.23E-05          | 9.38E-04             |
| Hypertension                                    | 1.34            | (0.80, 2.24)           | 0.2903  | 0.1599     | 6.95E-02          | 1.00E+00             |
| Other                                           | 1.19            | (0.49, 2.88)           | 0.1765  | 0.2714     | 5.16E-01          | 1.00E+00             |
| Other autoimmune disease                        | 1.55            | (0.78, 3.06)           | 0.4368  | 0.2105     | 3.80E-02          | 1.00E+00             |
| Other immunodeficiency disorder                 | 1.82            | (0.52, 6.31)           | 0.5962  | 0.3844     | 1.21E-01          | 1.00E+00             |

|                                                  |       |               |        |        |          |          |
|--------------------------------------------------|-------|---------------|--------|--------|----------|----------|
| <b>Other lung condition</b>                      | 2.09  | (0.80, 5.47)  | 0.7376 | 0.2965 | 1.29E-02 | 5.40E-01 |
| <b>Any</b>                                       | 2.22  | (1.33, 3.69)  | 0.7959 | 0.157  | 4.00E-07 | 1.68E-05 |
| <b>OBESITY</b>                                   |       |               |        |        |          |          |
| <b>obesity I (BMI &gt;= 30 and BMI &lt; 35)</b>  | 1.09  | (0.62, 1.93)  | 0.0882 | 0.1761 | 6.17E-01 | 1.00E+00 |
| <b>obesity II (BMI &gt;= 35 and BMI &lt; 40)</b> | 1.06  | (0.50, 2.26)  | 0.0605 | 0.2334 | 7.96E-01 | 1.00E+00 |
| <b>obesity III (BMI &gt;= 40)</b>                | 1.95  | (0.96, 3.98)  | 0.6695 | 0.2196 | 2.29E-03 | 9.64E-02 |
| <b>Not obese</b>                                 | 1     |               | 0      |        | nan      | nan      |
| <b>GENETIC SEX</b>                               |       |               |        |        |          |          |
| <b>Female</b>                                    | 1     |               | 0      |        | nan      | nan      |
| <b>Male</b>                                      | 1.5   | (0.95, 2.37)  | 0.4041 | 0.142  | 4.42E-03 | 1.85E-01 |
| <b>SYMPTOMS</b>                                  |       |               |        |        |          |          |
| <b>Abdominal pain</b>                            | 2.03  | (1.24, 3.32)  | 0.7095 | 0.1514 | 2.77E-06 | 1.16E-04 |
| <b>Body aches</b>                                | 1.88  | (1.08, 3.27)  | 0.6321 | 0.1707 | 2.13E-04 | 8.95E-03 |
| <b>Change in taste or smell</b>                  | 1.03  | (0.63, 1.66)  | 0.025  | 0.1485 | 8.66E-01 | 1.00E+00 |
| <b>Chills</b>                                    | 2.22  | (1.35, 3.66)  | 0.7975 | 0.1542 | 2.31E-07 | 9.70E-06 |
| <b>Cough producing phlegm</b>                    | 1.69  | (1.05, 2.70)  | 0.5233 | 0.1452 | 3.14E-04 | 1.32E-02 |
| <b>Diarrhea</b>                                  | 2.74  | (1.71, 4.39)  | 1.0077 | 0.1457 | 4.58E-12 | 1.92E-10 |
| <b>Dry cough</b>                                 | 2.73  | (1.62, 4.59)  | 1.0041 | 0.1601 | 3.60E-10 | 1.51E-08 |
| <b>Feeling tired or fatigue</b>                  | 2.86  | (1.10, 7.40)  | 1.05   | 0.2938 | 3.51E-04 | 1.48E-02 |
| <b>Fever</b>                                     | 3.34  | (1.91, 5.85)  | 1.2074 | 0.1726 | 2.65E-12 | 1.11E-10 |
| <b>Headache</b>                                  | 1.18  | (0.72, 1.95)  | 0.1678 | 0.1537 | 2.75E-01 | 1.00E+00 |
| <b>Nasal congestion</b>                          | 1.12  | (0.70, 1.78)  | 0.1106 | 0.1435 | 4.41E-01 | 1.00E+00 |
| <b>Nausea or vomiting</b>                        | 2.72  | (1.65, 4.49)  | 0.9997 | 0.1547 | 1.03E-10 | 4.31E-09 |
| <b>Runny nose</b>                                | 1.19  | (0.72, 1.95)  | 0.1704 | 0.153  | 2.65E-01 | 1.00E+00 |
| <b>Shortness of breath</b>                       | 12.87 | (6.18, 26.81) | 2.5549 | 0.2265 | 1.62E-29 | 6.79E-28 |
| <b>Sore throat</b>                               | 1.65  | (1.01, 2.68)  | 0.4991 | 0.1503 | 9.01E-04 | 3.79E-02 |

693  
694 Adjusted odds ratios for progression of COVID-19 infection to a critical, life-threatening illness  
695 were calculated among those reporting a positive COVID-19 test result. The following groups  
696 served as reference populations for the odds ratio calculations: European genetic ancestry  
697 (Genetic Ancestry), Ages 50-64 (Age), Female (Genetic Sex), and Not Obese (BMI < 30,  
698 Obesity). Note that symptoms odds ratios were calculated in a binary fashion among  
699 symptomatic customers only (Methods). Here, odds ratios were adjusted for age, sex,  
700 comorbidities (Y/N if any), and obesity (Y/N if BMI > 30, Methods).

701 **Supplementary Table 17. Unadjusted risk factor odds ratios for COVID-19 susceptibility**  
 702 **(training dataset)**

| RISK FACTOR                                     | ODDS RATIO (OR) | OR 95% CI (BONFERRONI) | logOR   | logOR S.E. | P-VALUE (NOMINAL) | P-VALUE (BONFERRONI) |
|-------------------------------------------------|-----------------|------------------------|---------|------------|-------------------|----------------------|
| <b>AGE</b>                                      |                 |                        |         |            |                   |                      |
| Ages 18-29                                      | 1.6             | (1.21, 2.11)           | 0.4693  | 0.0857     | 4.42E-08          | 1.86E-06             |
| Ages 30-49                                      | 1.11            | (0.92, 1.34)           | 0.105   | 0.0584     | 7.22E-02          | 1.00E+00             |
| Ages 50-64                                      | 1               |                        | 0       |            | nan               | nan                  |
| Ages 65+                                        | 0.49            | (0.38, 0.63)           | -0.7051 | 0.077      | 0.00E+00          | 0.00E+00             |
| <b>GENETIC ANCESTRY</b>                         |                 |                        |         |            |                   |                      |
| Admixed African-European                        | 1.24            | (0.85, 1.81)           | 0.2158  | 0.1168     | 6.47E-02          | 1.00E+00             |
| European                                        | 1               |                        | 0       |            | nan               | nan                  |
| Admixed Amerindian                              | 1.59            | (1.22, 2.07)           | 0.462   | 0.0814     | 1.36E-08          | 5.73E-07             |
| Other                                           | 1.16            | (0.94, 1.44)           | 0.1516  | 0.0665     | 2.27E-02          | 9.52E-01             |
| <b>EXPOSURE</b>                                 |                 |                        |         |            |                   |                      |
| Any                                             | 9.49            | (7.65, 11.77)          | 2.2503  | 0.0665     | 4.79E-251         | 2.01E-249            |
| Biological relative tested positive             | 5.74            | (4.66, 7.07)           | 1.7467  | 0.0644     | 4.71E-162         | 1.98E-160            |
| Directly exposed to someone who tested positive | 7.63            | (6.33, 9.19)           | 2.0317  | 0.0576     | 4.44E-272         | 1.87E-270            |
| Healthcare worker directly exposed              | 1.56            | (1.29, 1.87)           | 0.4417  | 0.0576     | 1.78E-14          | 7.47E-13             |
| Household member tested positive                | 24.28           | (19.62, 30.03)         | 3.1896  | 0.0657     | 0.00E+00          | 0.00E+00             |
| <b>PRE-EXISTING CONDITION</b>                   |                 |                        |         |            |                   |                      |
| Asthma                                          | 0.81            | (0.65, 1.00)           | -0.2166 | 0.0677     | 1.37E-03          | 5.75E-02             |
| COPD (Chronic Obstructive Pulmonary Disease)    | 0.54            | (0.31, 0.93)           | -0.6217 | 0.1684     | 2.22E-04          | 9.32E-03             |
| Cancer treated in the past year                 | 0.57            | (0.32, 1.00)           | -0.564  | 0.1731     | 1.12E-03          | 4.71E-02             |
| Cardiovascular disease                          | 0.74            | (0.51, 1.06)           | -0.3014 | 0.1122     | 7.26E-03          | 3.05E-01             |
| Chronic kidney disease                          | 0.55            | (0.28, 1.10)           | -0.5938 | 0.2139     | 5.49E-03          | 2.31E-01             |
| Diabetes                                        | 0.9             | (0.69, 1.17)           | -0.105  | 0.0816     | 1.98E-01          | 1.00E+00             |
| Hypertension                                    | 0.76            | (0.62, 0.93)           | -0.2728 | 0.061      | 7.64E-06          | 3.21E-04             |
| Other                                           | 0.93            | (0.66, 1.31)           | -0.0726 | 0.1049     | 4.89E-01          | 1.00E+00             |
| Other autoimmune disease                        | 0.8             | (0.61, 1.04)           | -0.2241 | 0.081      | 5.65E-03          | 2.37E-01             |
| Other immunodeficiency disorder                 | 0.77            | (0.42, 1.40)           | -0.2669 | 0.1854     | 1.50E-01          | 1.00E+00             |
| Other lung condition                            | 0.64            | (0.39, 1.03)           | -0.4524 | 0.1502     | 2.59E-03          | 1.09E-01             |

|                                                  |      |               |         |        |          |          |
|--------------------------------------------------|------|---------------|---------|--------|----------|----------|
| <b>Any</b>                                       | 0.67 | (0.57, 0.79)  | -0.3983 | 0.0498 | 1.33E-15 | 5.60E-14 |
| <b>OBESITY</b>                                   |      |               |         |        |          |          |
| <b>obesity I (BMI &gt;= 30 and BMI &lt; 35)</b>  | 1.02 | (0.83, 1.25)  | 0.0212  | 0.0628 | 7.35E-01 | 1.00E+00 |
| <b>obesity II (BMI &gt;= 35 and BMI &lt; 40)</b> | 1.15 | (0.94, 1.41)  | 0.1376  | 0.0626 | 2.81E-02 | 1.00E+00 |
| <b>obesity III (BMI &gt;= 40)</b>                | 1.13 | (0.85, 1.50)  | 0.12    | 0.0874 | 1.70E-01 | 1.00E+00 |
| <b>Not obese</b>                                 | 1    |               | 0       |        | nan      | nan      |
| <b>GENETIC SEX</b>                               |      |               |         |        |          |          |
| <b>Female</b>                                    | 1    |               | 0       |        | nan      | nan      |
| <b>Male</b>                                      | 1.16 | (0.98, 1.37)  | 0.1459  | 0.0525 | 5.43E-03 | 2.28E-01 |
| <b>SYMPTOMS</b>                                  |      |               |         |        |          |          |
| <b>Abdominal pain</b>                            | 0.97 | (0.64, 1.48)  | -0.0303 | 0.1303 | 8.16E-01 | 1.00E+00 |
| <b>Body aches</b>                                | 1.56 | (1.09, 2.23)  | 0.4461  | 0.1104 | 5.34E-05 | 2.24E-03 |
| <b>Change in taste or smell</b>                  | 7.02 | (4.67, 10.56) | 1.9493  | 0.1257 | 2.96E-54 | 1.24E-52 |
| <b>Chills</b>                                    | 1.38 | (0.97, 1.96)  | 0.3211  | 0.1085 | 3.08E-03 | 1.29E-01 |
| <b>Cough producing phlegm</b>                    | 0.93 | (0.64, 1.37)  | -0.0685 | 0.1178 | 5.61E-01 | 1.00E+00 |
| <b>Diarrhea</b>                                  | 1.18 | (0.81, 1.72)  | 0.1672  | 0.1158 | 1.49E-01 | 1.00E+00 |
| <b>Dry cough</b>                                 | 1.29 | (0.91, 1.84)  | 0.2578  | 0.1082 | 1.72E-02 | 7.21E-01 |
| <b>Feeling tired or fatigue</b>                  | 1.54 | (0.99, 2.42)  | 0.4341  | 0.1381 | 1.67E-03 | 7.03E-02 |
| <b>Fever</b>                                     | 1.54 | (1.08, 2.19)  | 0.4295  | 0.1088 | 7.84E-05 | 3.29E-03 |
| <b>Headache</b>                                  | 1.39 | (0.97, 2.00)  | 0.33    | 0.1118 | 3.17E-03 | 1.33E-01 |
| <b>Nasal congestion</b>                          | 0.85 | (0.60, 1.21)  | -0.1632 | 0.1081 | 1.31E-01 | 1.00E+00 |
| <b>Nausea or vomiting</b>                        | 0.82 | (0.53, 1.26)  | -0.1979 | 0.1327 | 1.36E-01 | 1.00E+00 |
| <b>Runny nose</b>                                | 0.59 | (0.41, 0.86)  | -0.5246 | 0.1137 | 3.92E-06 | 1.65E-04 |
| <b>Shortness of breath</b>                       | 1.25 | (0.87, 1.79)  | 0.2219  | 0.1106 | 4.48E-02 | 1.00E+00 |
| <b>Sore throat</b>                               | 0.48 | (0.34, 0.69)  | -0.7286 | 0.1117 | 6.84E-11 | 2.87E-09 |

703  
 704 Unadjusted odds ratios for a positive COVID-19 test were calculated among survey participants  
 705 reporting a test result (positive or negative). The following groups served as reference  
 706 populations for the odds ratio calculations: European genetic ancestry (Genetic Ancestry), Ages  
 707 50-64 (Age), Female (Genetic Sex), and Not Obese (BMI < 30, Obesity). Note that symptoms  
 708 odds ratios were calculated in a binary fashion among symptomatic customers only (Methods).  
 709

710 **Supplementary Table 18. Unadjusted risk factor odds ratios for COVID-19 hospitalization**  
 711 **(training dataset)**

712

| RISK FACTOR                                     | ODDS RATIO (OR) | OR 95% CI (BONFERRONI) | logOR   | logOR S.E. | P-VALUE (NOMINAL) | P-VALUE (BONFERRONI) |
|-------------------------------------------------|-----------------|------------------------|---------|------------|-------------------|----------------------|
| <b>AGE</b>                                      |                 |                        |         |            |                   |                      |
| Ages 18-29                                      | 0.53            | (0.20, 1.37)           | -0.6395 | 0.2951     | 3.02E-02          | 1.00E+00             |
| Ages 30-49                                      | 0.5             | (0.27, 0.92)           | -0.6907 | 0.1879     | 2.37E-04          | 9.95E-03             |
| Ages 50-64                                      | 1               |                        | 0       |            | nan               | nan                  |
| Ages 65+                                        | 1.64            | (0.87, 3.08)           | 0.4956  | 0.1943     | 1.07E-02          | 4.51E-01             |
| <b>GENETIC ANCESTRY</b>                         |                 |                        |         |            |                   |                      |
| Admixed African-European                        | 1.19            | (0.43, 3.28)           | 0.176   | 0.3121     | 5.73E-01          | 1.00E+00             |
| European                                        | 1               |                        | 0       |            | nan               | nan                  |
| Admixed Amerindian                              | 0.77            | (0.32, 1.86)           | -0.2551 | 0.2703     | 3.45E-01          | 1.00E+00             |
| Other                                           | 0.69            | (0.34, 1.39)           | -0.3752 | 0.2169     | 8.37E-02          | 1.00E+00             |
| <b>EXPOSURE</b>                                 |                 |                        |         |            |                   |                      |
| Any                                             | 0.69            | (0.34, 1.39)           | -0.3732 | 0.2174     | 8.61E-02          | 1.00E+00             |
| Biological relative tested positive             | 1.06            | (0.60, 1.88)           | 0.0572  | 0.1772     | 7.47E-01          | 1.00E+00             |
| Directly exposed to someone who tested positive | 0.54            | (0.29, 0.98)           | -0.6207 | 0.1867     | 8.86E-04          | 3.72E-02             |
| Healthcare worker directly exposed              | 0.57            | (0.29, 1.10)           | -0.5698 | 0.2042     | 5.26E-03          | 2.21E-01             |
| Household member tested positive                | 0.88            | (0.53, 1.45)           | -0.1332 | 0.1551     | 3.90E-01          | 1.00E+00             |
| <b>HEALTH CONDITIONS</b>                        |                 |                        |         |            |                   |                      |
| Asthma                                          | 1.17            | (0.62, 2.19)           | 0.1555  | 0.1944     | 4.24E-01          | 1.00E+00             |
| COPD (Chronic Obstructive Pulmonary Disease)    | 2.95            | (0.82, 10.67)          | 1.083   | 0.3962     | 6.27E-03          | 2.63E-01             |
| Cancer treated in the past year                 | 3.21            | (0.88, 11.78)          | 1.1677  | 0.4006     | 3.56E-03          | 1.49E-01             |
| Cardiovascular disease                          | 2.73            | (1.18, 6.28)           | 1.0036  | 0.2573     | 9.62E-05          | 4.04E-03             |
| Chronic kidney disease                          | 10.82           | (2.86, 40.90)          | 2.3812  | 0.4103     | 6.49E-09          | 2.73E-07             |
| Diabetes                                        | 3.21            | (1.70, 6.06)           | 1.1676  | 0.1957     | 2.44E-09          | 1.02E-07             |
| Hypertension                                    | 1.68            | (0.98, 2.88)           | 0.5172  | 0.1664     | 1.88E-03          | 7.91E-02             |
| Other                                           | 1.63            | (0.74, 3.63)           | 0.4906  | 0.2463     | 4.64E-02          | 1.00E+00             |
| Other autoimmune disease                        | 1.21            | (0.58, 2.54)           | 0.1914  | 0.2288     | 4.03E-01          | 1.00E+00             |
| Other immunodeficiency disorder                 | 0.77            | (0.11, 5.53)           | -0.2655 | 0.6094     | 6.63E-01          | 1.00E+00             |



|                                                  |      |               |         |        |          |          |
|--------------------------------------------------|------|---------------|---------|--------|----------|----------|
| <b>Other lung condition</b>                      | 1.8  | (0.50, 6.55)  | 0.5883  | 0.3983 | 1.40E-01 | 1.00E+00 |
| <b>Any</b>                                       | 2.36 | (1.41, 3.93)  | 0.8574  | 0.1575 | 5.26E-08 | 2.21E-06 |
| <b>OBESITY</b>                                   |      |               |         |        |          |          |
| <b>obesity I (BMI &gt;= 30 and BMI &lt; 35)</b>  | 1.32 | (0.74, 2.34)  | 0.2765  | 0.1771 | 1.19E-01 | 1.00E+00 |
| <b>obesity II (BMI &gt;= 35 and BMI &lt; 40)</b> | 1.08 | (0.56, 2.06)  | 0.0753  | 0.2001 | 7.07E-01 | 1.00E+00 |
| <b>obesity III (BMI &gt;= 40)</b>                | 1.42 | (0.62, 3.26)  | 0.3505  | 0.2566 | 1.72E-01 | 1.00E+00 |
| <b>Not obese</b>                                 | 1    |               | 0       |        | nan      | nan      |
| <b>GENETIC SEX</b>                               |      |               |         |        |          |          |
| <b>Female</b>                                    | 1    |               | 0       |        | nan      | nan      |
| <b>Male</b>                                      | 1.29 | (0.79, 2.12)  | 0.2584  | 0.1525 | 9.02E-02 | 1.00E+00 |
| <b>SYMPTOMS</b>                                  |      |               |         |        |          |          |
| <b>Abdominal pain</b>                            | 1.79 | (1.04, 3.10)  | 0.5841  | 0.1686 | 5.33E-04 | 2.24E-02 |
| <b>Body aches</b>                                | 1.6  | (0.90, 2.83)  | 0.4695  | 0.1765 | 7.80E-03 | 3.28E-01 |
| <b>Change in taste or smell</b>                  | 0.83 | (0.50, 1.38)  | -0.189  | 0.1582 | 2.32E-01 | 1.00E+00 |
| <b>Chills</b>                                    | 2.18 | (1.29, 3.71)  | 0.7814  | 0.1632 | 1.68E-06 | 7.07E-05 |
| <b>Cough producing phlegm</b>                    | 1.51 | (0.90, 2.53)  | 0.4096  | 0.1596 | 1.03E-02 | 4.31E-01 |
| <b>Diarrhea</b>                                  | 2.04 | (1.24, 3.36)  | 0.7114  | 0.154  | 3.87E-06 | 1.62E-04 |
| <b>Dry cough</b>                                 | 2.5  | (1.47, 4.28)  | 0.9179  | 0.1653 | 2.80E-08 | 1.18E-06 |
| <b>Feeling tired or fatigue</b>                  | 4.47 | (1.35, 14.73) | 1.4965  | 0.3681 | 4.79E-05 | 2.01E-03 |
| <b>Fever</b>                                     | 3.06 | (1.72, 5.44)  | 1.1178  | 0.178  | 3.36E-10 | 1.41E-08 |
| <b>Headache</b>                                  | 0.87 | (0.52, 1.47)  | -0.1351 | 0.16   | 3.99E-01 | 1.00E+00 |
| <b>Nasal congestion</b>                          | 0.73 | (0.44, 1.23)  | -0.3139 | 0.1595 | 4.90E-02 | 1.00E+00 |
| <b>Nausea or vomiting</b>                        | 2.48 | (1.45, 4.23)  | 0.9068  | 0.1653 | 4.13E-08 | 1.74E-06 |
| <b>Runny nose</b>                                | 0.87 | (0.49, 1.55)  | -0.1355 | 0.1777 | 4.46E-01 | 1.00E+00 |
| <b>Shortness of breath</b>                       | 6.4  | (3.49, 11.73) | 1.8558  | 0.187  | 3.34E-23 | 1.40E-21 |
| <b>Sore throat</b>                               | 1.03 | (0.59, 1.80)  | 0.0332  | 0.1717 | 8.47E-01 | 1.00E+00 |

713  
714 Unadjusted odds ratios for hospitalization due to COVID-19 infection were calculated among  
715 those reporting a positive COVID-19 test result. The following groups served as reference  
716 populations for the odds ratio calculations: European genetic ancestry (Genetic Ancestry), Ages  
717 50-64 (Age), Female (Genetic Sex), and Not Obese (BMI < 30, Obesity). Note that symptoms  
718 odds ratios were calculated in a binary fashion among symptomatic customers only (Methods).  
719

720 **Supplementary Table 19. Unadjusted risk factor odds ratios for progression of COVID-19**  
 721 **to a critical case (training dataset)**

722

| RISK FACTOR                                     | ODDS RATIO (OR) | OR 95% CI (BONFERRONI) | logOR   | logOR S.E. | P-VALUE (NOMINAL) | P-VALUE (BONFERRONI) |
|-------------------------------------------------|-----------------|------------------------|---------|------------|-------------------|----------------------|
| <b>AGE</b>                                      |                 |                        |         |            |                   |                      |
| Ages 18-29                                      | 0.48            | (0.12, 1.84)           | -0.7444 | 0.4175     | 7.46E-02          | 1.00E+00             |
| Ages 30-49                                      | 0.61            | (0.28, 1.33)           | -0.4935 | 0.2408     | 4.04E-02          | 1.00E+00             |
| Ages 50-64                                      | 1               |                        | 0       |            | nan               | nan                  |
| Ages 65+                                        | 1.32            | (0.56, 3.12)           | 0.2779  | 0.2651     | 2.95E-01          | 1.00E+00             |
| <b>GENETIC ANCESTRY</b>                         |                 |                        |         |            |                   |                      |
| Admixed African-European                        | 2.2             | (0.72, 6.73)           | 0.7892  | 0.3445     | 2.20E-02          | 9.24E-01             |
| European                                        | 1               |                        | 0       |            | nan               | nan                  |
| Admixed Amerindian                              | 1.08            | (0.36, 3.21)           | 0.0779  | 0.3354     | 8.16E-01          | 1.00E+00             |
| Other                                           | 0.84            | (0.34, 2.13)           | -0.1692 | 0.2852     | 5.53E-01          | 1.00E+00             |
| <b>EXPOSURE</b>                                 |                 |                        |         |            |                   |                      |
| Any                                             | 0.67            | (0.26, 1.72)           | -0.3951 | 0.2884     | 1.71E-01          | 1.00E+00             |
| Biological relative tested positive             | 1.18            | (0.56, 2.50)           | 0.1677  | 0.2304     | 4.67E-01          | 1.00E+00             |
| Directly exposed to someone who tested positive | 0.46            | (0.20, 1.03)           | -0.7835 | 0.2502     | 1.74E-03          | 7.31E-02             |
| Healthcare worker directly exposed              | 0.61            | (0.25, 1.47)           | -0.4938 | 0.2711     | 6.85E-02          | 1.00E+00             |
| Household member tested positive                | 0.99            | (0.51, 1.93)           | -0.0064 | 0.2055     | 9.75E-01          | 1.00E+00             |
| <b>PRE-EXISTING CONDITION</b>                   |                 |                        |         |            |                   |                      |
| Asthma                                          | 1.04            | (0.44, 2.46)           | 0.0353  | 0.2669     | 8.95E-01          | 1.00E+00             |
| COPD (Chronic Obstructive Pulmonary Disease)    | 4.34            | (1.06, 17.88)          | 1.4689  | 0.4366     | 7.66E-04          | 3.22E-02             |
| Cancer treated in the past year                 | 1.66            | (0.23, 12.21)          | 0.5094  | 0.6149     | 4.07E-01          | 1.00E+00             |
| Cardiovascular disease                          | 2.88            | (1.03, 8.08)           | 1.0584  | 0.318      | 8.74E-04          | 3.67E-02             |
| Chronic kidney disease                          | 13.83           | (3.59, 53.34)          | 2.6267  | 0.4165     | 2.85E-10          | 1.20E-08             |
| Diabetes                                        | 3.53            | (1.61, 7.75)           | 1.2624  | 0.2422     | 1.86E-07          | 7.82E-06             |
| Hypertension                                    | 2.16            | (1.09, 4.29)           | 0.7721  | 0.2113     | 2.59E-04          | 1.09E-02             |
| Other                                           | 1.64            | (0.58, 4.63)           | 0.4926  | 0.3206     | 1.24E-01          | 1.00E+00             |
| Other autoimmune disease                        | 1.28            | (0.49, 3.36)           | 0.2478  | 0.2976     | 4.05E-01          | 1.00E+00             |
| Other immunodeficiency disorder                 | 2.16            | (0.37, 12.54)          | 0.7723  | 0.542      | 1.54E-01          | 1.00E+00             |

|                                                  |       |               |         |        |          |          |
|--------------------------------------------------|-------|---------------|---------|--------|----------|----------|
| <b>Other lung condition</b>                      | 3.74  | (1.01, 13.88) | 1.3195  | 0.4045 | 1.10E-03 | 4.64E-02 |
| <b>Any</b>                                       | 3.13  | (1.52, 6.45)  | 1.1406  | 0.2233 | 3.25E-07 | 1.37E-05 |
| <b>OBESITY</b>                                   |       |               |         |        |          |          |
| <b>obesity I (BMI &gt;= 30 and BMI &lt; 35)</b>  | 1.24  | (0.57, 2.68)  | 0.2116  | 0.2385 | 3.75E-01 | 1.00E+00 |
| <b>obesity II (BMI &gt;= 35 and BMI &lt; 40)</b> | 1.12  | (0.48, 2.62)  | 0.1104  | 0.2632 | 6.75E-01 | 1.00E+00 |
| <b>obesity III (BMI &gt;= 40)</b>                | 1.5   | (0.51, 4.38)  | 0.4053  | 0.3305 | 2.20E-01 | 1.00E+00 |
| <b>Not obese</b>                                 | 1     |               | 0       |        | nan      | nan      |
| <b>GENETIC SEX</b>                               |       |               |         |        |          |          |
| <b>Female</b>                                    | 1     |               | 0       |        | nan      | nan      |
| <b>Male</b>                                      | 1.53  | (0.80, 2.94)  | 0.4266  | 0.2013 | 3.41E-02 | 1.00E+00 |
| <b>SYMPTOMS</b>                                  |       |               |         |        |          |          |
| <b>Abdominal pain</b>                            | 2.02  | (1.01, 4.06)  | 0.7042  | 0.2147 | 1.04E-03 | 4.37E-02 |
| <b>Body aches</b>                                | 2.16  | (0.95, 4.93)  | 0.7723  | 0.2541 | 2.37E-03 | 9.95E-02 |
| <b>Change in taste or smell</b>                  | 0.73  | (0.37, 1.41)  | -0.3191 | 0.2051 | 1.20E-01 | 1.00E+00 |
| <b>Chills</b>                                    | 2.32  | (1.14, 4.72)  | 0.8403  | 0.2196 | 1.30E-04 | 5.44E-03 |
| <b>Cough producing phlegm</b>                    | 1.89  | (0.97, 3.66)  | 0.6342  | 0.2046 | 1.94E-03 | 8.13E-02 |
| <b>Diarrhea</b>                                  | 2.33  | (1.21, 4.48)  | 0.844   | 0.2021 | 2.96E-05 | 1.24E-03 |
| <b>Dry cough</b>                                 | 2.69  | (1.30, 5.56)  | 0.9909  | 0.2238 | 9.53E-06 | 4.00E-04 |
| <b>Feeling tired or fatigue</b>                  | 6.27  | (0.93, 42.41) | 1.8352  | 0.59   | 1.87E-03 | 7.84E-02 |
| <b>Fever</b>                                     | 3.33  | (1.50, 7.36)  | 1.2022  | 0.2449 | 9.18E-07 | 3.85E-05 |
| <b>Headache</b>                                  | 0.86  | (0.44, 1.70)  | -0.1487 | 0.2098 | 4.78E-01 | 1.00E+00 |
| <b>Nasal congestion</b>                          | 0.92  | (0.48, 1.80)  | -0.0791 | 0.2053 | 7.00E-01 | 1.00E+00 |
| <b>Nausea or vomiting</b>                        | 2.43  | (1.22, 4.84)  | 0.8874  | 0.2129 | 3.07E-05 | 1.29E-03 |
| <b>Runny nose</b>                                | 0.95  | (0.45, 2.01)  | -0.0495 | 0.2303 | 8.30E-01 | 1.00E+00 |
| <b>Shortness of breath</b>                       | 10.57 | (3.99, 28.02) | 2.3584  | 0.3007 | 4.35E-15 | 1.83E-13 |
| <b>Sore throat</b>                               | 1.27  | (0.63, 2.57)  | 0.2369  | 0.2177 | 2.76E-01 | 1.00E+00 |

723

724 Unadjusted odds ratios for progression of COVID-19 infection to a critical, life-threatening  
 725 illness were calculated among those reporting a positive COVID-19 test result. The following  
 726 groups served as reference populations for the odds ratio calculations: European genetic ancestry  
 727 (Genetic Ancestry), Ages 50-64 (Age), Female (Genetic Sex), and Not Obese (BMI < 30,  
 728 Obesity). Note that symptoms odds ratios were calculated in a binary fashion among  
 729 symptomatic customers only (Methods).

730

731 **Supplementary Table 20. Summary of risk factors and performances of different models**

732  
733

| Model                                                                                          | Risk Factors in Final Model                                                                                                                                                                                                                                                                                                                                                                                                                                                                                                          | Holdout AUC (95% CI) |
|------------------------------------------------------------------------------------------------|--------------------------------------------------------------------------------------------------------------------------------------------------------------------------------------------------------------------------------------------------------------------------------------------------------------------------------------------------------------------------------------------------------------------------------------------------------------------------------------------------------------------------------------|----------------------|
| <b>Susceptibility– symptoms excluded (Dem + Exp)</b>                                           | sex, aged 18-29 (Y/N), aged 30-49 (Y/N), aged 50-64 (Y/N), aged 65+ (Y/N), Healthcare worker directly exposed, Household member tested positive, Household positive case count, Biological relative tested positive, Directly exposed to someone who tested positive                                                                                                                                                                                                                                                                 | 0.84 (0.82, 0.86)    |
| <b>Susceptibility– symptoms included (Dem + Exp + Symp)</b>                                    | sex, Fever, Runny nose, Sore throat, Feeling tired or fatigue, Change in taste or smell, aged 18-29 (Y/N), aged 30-49 (Y/N), aged 50-64 (Y/N), aged 65+ (Y/N), Healthcare worker directly exposed, Household member tested positive, Household positive case count, Biological relative tested positive, Directly exposed to someone who tested positive                                                                                                                                                                             | 0.94 (0.92, 0.96)    |
| <b>Susceptibility– symptoms excluded, L1-penalized model across larger set of risk factors</b> | aged 18-29 (Y/N), aged 30-49 (Y/N), aged 65+ (Y/N), Biological relative tested positive, Directly exposed to someone who tested positive, Hypertension, Healthcare worker directly exposed, Household positive case count, Household member tested positive, Health condition (Y/N if any)                                                                                                                                                                                                                                           | 0.86 (0.85, 0.87)    |
| <b>Susceptibility– symptoms included, L1-penalized model across larger set of risk factors</b> | aged 18-29 (Y/N), aged 30-49 (Y/N), aged 65+ (Y/N), Biological relative tested positive, Directly exposed to someone who tested positive, Hypertension, Healthcare worker directly exposed, Household positive case count, Household member tested positive, Health condition (Y/N if any), Abdominal pain, Body aches, Change in taste or smell, Chills, Cough producing phlegm, Diarrhea, Dry cough, Feeling tired or fatigue, Fever, Headache, Nasal congestion, Nausea or vomiting, Runny nose, Shortness of breath, Sore throat | 0.90 (0.86, 0.94)    |
| <b>Susceptibility– literature-based "minimal" model (HWF Exp + Symp)</b>                       | Change in taste or smell, Household member tested positive, Directly exposed to someone who tested positive                                                                                                                                                                                                                                                                                                                                                                                                                          | 0.90 (0.88, 0.93)    |
| <b>Susceptibility– literature-based "symptoms-only" model (HWF Symp)</b>                       | Fever, Shortness of breath, Dry cough, Sore throat, Chills, Body aches, Change in taste or smell                                                                                                                                                                                                                                                                                                                                                                                                                                     | 0.87 (0.84, 0.90)    |
| <b>Severity– hospitalization</b>                                                               | sex, Fever, Shortness of breath, Dry cough, Feeling tired or fatigue, Diarrhea, Obesity III (BMI $\geq$ 40), aged 18-29 (Y/N), aged 30-49 (Y/N), aged 50-64 (Y/N), aged 65+ (Y/N), Health condition (Y/N if any)                                                                                                                                                                                                                                                                                                                     | 0.87 (0.84, 0.90)    |
| <b>Severity– hospitalization, L1-penalized model across larger set of risk factors</b>         | aged 30-49 (Y/N), aged 50-64 (Y/N), aged 65+ (Y/N), COPD (Chronic Obstructive Pulmonary Disease), Cancer (treated in the past year), Cardiovascular disease, Chronic kidney disease, Diabetes, Hypertension, Other, Health condition (Y/N if any), Abdominal pain, Chills, Cough producing phlegm, Diarrhea, Dry cough, Feeling tired or fatigue, Fever, Nausea or vomiting, Shortness of breath                                                                                                                                     | 0.87 (0.86, 0.88)    |
| <b>Severity– critical case</b>                                                                 | sex, Fever, Shortness of breath, Dry cough, Feeling tired or fatigue, Diarrhea, Obesity III (BMI $\geq$ 40), aged 18-29 (Y/N), aged 30-49 (Y/N), aged 50-64 (Y/N), aged 65+ (Y/N), Health condition (Y/N if any)                                                                                                                                                                                                                                                                                                                     | 0.90 (0.87, 0.93)    |
| <b>Severity– critical case, L1-penalized model across larger set of risk factors</b>           | aged 30-49 (Y/N), aged 65+ (Y/N), COPD (Chronic Obstructive Pulmonary Disease), Cardiovascular disease, Chronic kidney disease, Diabetes, Hypertension, Other lung condition, Health condition (Y/N if any), Seasonal flu, sex, Abdominal pain, Body aches, Chills, Cough producing phlegm, Diarrhea, Dry cough, Feeling tired or fatigue, Fever, Nausea or vomiting, Shortness of breath                                                                                                                                            | 0.89 (0.87, 0.91)    |

734

735 Risk factors for models were selected based on literature as well as nominally significant odds  
736 ratios within the training dataset (Methods). 95% confidence intervals for the area under the  
737 curve (AUC) on the holdout dataset were estimated via bootstrapping (Methods).  
738

739 **Supplementary Table 21. Stratified holdout performance assessment for a COVID-19**  
 740 **susceptibility model built from age, sex, and exposures (Dem + Exp)**

741

| cohort                                    | N    | ncase | ncontrol | AUC               | Sensitivity       | Specificity       |
|-------------------------------------------|------|-------|----------|-------------------|-------------------|-------------------|
| Admixed African-European Genetic Ancestry | 228  | 38    | 190      | 0.88 (0.82, 0.94) | 0.89 (0.80, 0.99) | 0.65 (0.59, 0.72) |
| All                                       | 4834 | 632   | 4202     | 0.84 (0.82, 0.86) | 0.75 (0.72, 0.79) | 0.76 (0.75, 0.78) |
| European Genetic Ancestry                 | 3372 | 408   | 2964     | 0.84 (0.82, 0.87) | 0.74 (0.70, 0.78) | 0.79 (0.77, 0.80) |
| Admixed Amerindian Genetic Ancestry       | 410  | 73    | 337      | 0.80 (0.74, 0.86) | 0.74 (0.64, 0.84) | 0.71 (0.66, 0.75) |
| Other Genetic Ancestry                    | 824  | 113   | 711      | 0.83 (0.78, 0.87) | 0.77 (0.69, 0.85) | 0.71 (0.68, 0.75) |
| Ages 18-29                                | 340  | 74    | 266      | 0.83 (0.77, 0.89) | 0.81 (0.72, 0.90) | 0.65 (0.59, 0.71) |
| Ages 30-49                                | 1744 | 270   | 1474     | 0.80 (0.77, 0.83) | 0.82 (0.77, 0.86) | 0.59 (0.56, 0.61) |
| Ages 50-65                                | 1515 | 200   | 1315     | 0.85 (0.82, 0.88) | 0.73 (0.67, 0.79) | 0.81 (0.79, 0.83) |
| Ages 65+                                  | 1235 | 88    | 1147     | 0.81 (0.75, 0.87) | 0.57 (0.47, 0.67) | 0.96 (0.95, 0.97) |
| Female                                    | 3354 | 409   | 2945     | 0.83 (0.81, 0.85) | 0.73 (0.68, 0.77) | 0.77 (0.75, 0.79) |
| Male                                      | 1480 | 223   | 1257     | 0.85 (0.82, 0.88) | 0.81 (0.76, 0.86) | 0.75 (0.73, 0.77) |

742  
 743 Case/control status is defined based on a self-reported COVID-19 positive test result. The Dem +  
 744 Exp model includes questions about exposures, age, and sex (Supplementary Table 20). Metric  
 745 performance columns reflect mean and nominal 95% confidence intervals for each metric on an  
 746 internal, independent holdout dataset (Methods). Cohort-level receiver operator characteristic  
 747 (ROC) curves were constructed from predicted class probabilities of models trained on the entire  
 748 training dataset (Methods).

749  
 750

751 **Supplementary Table 22. Stratified holdout performance assessment for a COVID-19**  
 752 **susceptibility model built from age, sex, exposures, and symptoms (Dem + Exp + Symp)**  
 753

| cohort                                    | N    | ncase | ncontrol | AUC               | Sensitivity       | Specificity       |
|-------------------------------------------|------|-------|----------|-------------------|-------------------|-------------------|
| Admixed African-European Genetic Ancestry | 96   | 12    | 84       | 0.96 (0.88, 1.00) | 0.91 (0.75, 1.00) | 0.92 (0.86, 0.98) |
| All                                       | 2047 | 229   | 1818     | 0.94 (0.92, 0.96) | 0.85 (0.80, 0.89) | 0.91 (0.90, 0.93) |
| European Genetic Ancestry                 | 1457 | 146   | 1311     | 0.93 (0.90, 0.96) | 0.83 (0.77, 0.90) | 0.91 (0.90, 0.93) |
| Admixed Amerindian Genetic Ancestry       | 155  | 23    | 132      | 0.98 (0.95, 1.00) | 0.96 (0.87, 1.00) | 0.89 (0.84, 0.95) |
| Other Genetic Ancestry                    | 339  | 48    | 291      | 0.94 (0.90, 0.99) | 0.81 (0.70, 0.92) | 0.93 (0.90, 0.96) |
| Ages 18-29                                | 132  | 29    | 103      | 0.98 (0.95, 1.00) | 0.93 (0.84, 1.00) | 0.92 (0.87, 0.97) |
| Ages 30-49                                | 582  | 77    | 505      | 0.96 (0.95, 0.98) | 0.89 (0.82, 0.96) | 0.88 (0.85, 0.91) |
| Ages 50-65                                | 616  | 83    | 533      | 0.93 (0.90, 0.97) | 0.84 (0.76, 0.92) | 0.91 (0.88, 0.93) |
| Ages 65+                                  | 717  | 40    | 677      | 0.89 (0.83, 0.96) | 0.72 (0.58, 0.86) | 0.95 (0.93, 0.97) |
| Female                                    | 1380 | 139   | 1241     | 0.94 (0.91, 0.97) | 0.86 (0.80, 0.92) | 0.91 (0.89, 0.92) |
| Male                                      | 667  | 90    | 577      | 0.94 (0.90, 0.97) | 0.83 (0.76, 0.91) | 0.93 (0.91, 0.96) |

754  
 755 Case/control status is defined based on self-reported COVID-19 positive test result. The Dem +  
 756 Exp + Symp model includes questions about exposures, age, sex, and five symptom questions  
 757 (Supplementary Table 20). Metric performance columns reflect mean and nominal 95%  
 758 confidence intervals for each metric on an internal, independent holdout dataset (Methods).  
 759 Cohort-level receiver operator characteristic (ROC) curves were constructed from predicted class  
 760 probabilities of models trained on the entire training dataset (Methods).  
 761  
 762  
 763

764 **Supplementary Table 23. Stratified holdout performance assessment for a literature-based**  
 765 **COVID-19 susceptibility model based on two exposures and one symptom (HWF Exp +**  
 766 **Symp)**

767  
 768

| cohort                                    | N    | ncase | ncontrol | AUC               | Sensitivity       | Specificity       |
|-------------------------------------------|------|-------|----------|-------------------|-------------------|-------------------|
| Admixed African-European Genetic Ancestry | 96   | 12    | 84       | 0.94 (0.84, 1.00) | 0.92 (0.76, 1.00) | 0.94 (0.89, 0.99) |
| All                                       | 2047 | 229   | 1818     | 0.90 (0.88, 0.93) | 0.78 (0.73, 0.83) | 0.94 (0.93, 0.95) |
| European Genetic Ancestry                 | 1457 | 146   | 1311     | 0.89 (0.86, 0.92) | 0.75 (0.68, 0.82) | 0.94 (0.93, 0.95) |
| Admixed Amerindian Genetic Ancestry       | 155  | 23    | 132      | 0.94 (0.88, 1.00) | 0.87 (0.73, 1.00) | 0.92 (0.87, 0.97) |
| Other Genetic Ancestry                    | 339  | 48    | 291      | 0.92 (0.87, 0.97) | 0.79 (0.68, 0.90) | 0.96 (0.94, 0.98) |
| Ages 18-29                                | 132  | 29    | 103      | 0.92 (0.85, 0.99) | 0.79 (0.65, 0.94) | 0.96 (0.92, 1.00) |
| Ages 30-49                                | 582  | 77    | 505      | 0.91 (0.86, 0.95) | 0.82 (0.73, 0.91) | 0.92 (0.90, 0.95) |
| Ages 50-65                                | 616  | 83    | 533      | 0.91 (0.87, 0.95) | 0.81 (0.73, 0.89) | 0.93 (0.91, 0.95) |
| Ages 65+                                  | 717  | 40    | 677      | 0.85 (0.77, 0.92) | 0.65 (0.50, 0.80) | 0.96 (0.95, 0.98) |
| Female                                    | 1380 | 139   | 1241     | 0.91 (0.88, 0.94) | 0.81 (0.75, 0.88) | 0.94 (0.92, 0.95) |
| Male                                      | 667  | 90    | 577      | 0.89 (0.85, 0.94) | 0.73 (0.64, 0.83) | 0.95 (0.94, 0.97) |

769 Case/control status is defined based on self-reported COVID-19 positive test result. The  
 770 literature-based HWF Exp + Symp model contains two exposure questions and a question about  
 771 one symptom (change in taste or smell, Supplementary Table 20).<sup>18</sup> Metric performance columns  
 772 reflect mean and nominal 95% confidence intervals for each metric on an internal, independent  
 773 holdout dataset (Methods). Cohort-level receiver operator characteristic (ROC) curves were  
 774 constructed from predicted class probabilities of models trained on the entire training dataset  
 775 (Methods).

776  
 777  
 778  
 779  
 780



781 **Supplementary Table 24. Stratified holdout performance assessment for a literature-based**  
 782 **COVID-19 susceptibility model based on seven symptoms (HWF Symp)**

783  
 784

| cohort                                    | N    | ncase | ncontrol | AUC               | Sensitivity       | Specificity       |
|-------------------------------------------|------|-------|----------|-------------------|-------------------|-------------------|
| Admixed African-European Genetic Ancestry | 96   | 12    | 84       | 0.90 (0.77, 1.00) | 0.84 (0.62, 1.00) | 0.92 (0.86, 0.98) |
| All                                       | 2047 | 229   | 1818     | 0.87 (0.84, 0.90) | 0.75 (0.69, 0.80) | 0.91 (0.90, 0.93) |
| European Genetic Ancestry                 | 1457 | 146   | 1311     | 0.87 (0.83, 0.91) | 0.75 (0.68, 0.82) | 0.91 (0.89, 0.93) |
| Admixed Amerindian Genetic Ancestry       | 155  | 23    | 132      | 0.92 (0.85, 0.99) | 0.87 (0.73, 1.00) | 0.93 (0.89, 0.97) |
| Other Genetic Ancestry                    | 339  | 48    | 291      | 0.83 (0.76, 0.91) | 0.67 (0.53, 0.80) | 0.92 (0.89, 0.95) |
| Ages 18-29                                | 132  | 29    | 103      | 0.85 (0.75, 0.96) | 0.79 (0.64, 0.95) | 0.94 (0.90, 0.99) |
| Ages 30-49                                | 582  | 77    | 505      | 0.89 (0.85, 0.93) | 0.75 (0.66, 0.85) | 0.88 (0.85, 0.91) |
| Ages 50-65                                | 616  | 83    | 533      | 0.86 (0.80, 0.91) | 0.75 (0.65, 0.84) | 0.89 (0.87, 0.92) |
| Ages 65+                                  | 717  | 40    | 677      | 0.84 (0.76, 0.92) | 0.70 (0.55, 0.85) | 0.95 (0.93, 0.96) |
| Female                                    | 1380 | 139   | 1241     | 0.87 (0.83, 0.91) | 0.76 (0.69, 0.83) | 0.90 (0.88, 0.92) |
| Male                                      | 667  | 90    | 577      | 0.87 (0.83, 0.92) | 0.73 (0.63, 0.82) | 0.94 (0.92, 0.96) |

785 Case/control status is defined based on self-reported COVID-19 positive test result. The  
 786 literature-based HWF Symp model contains 7 symptoms most commonly associated with  
 787 COVID-19 (Supplementary Table 20).<sup>18</sup> Metric performance columns reflect mean and nominal  
 788 95% confidence intervals for each metric on an internal, independent holdout dataset (Methods).  
 789 Cohort-level receiver operator characteristic (ROC) curves were constructed from predicted class  
 790 probabilities of models trained on the entire training dataset (Methods).

791

792 **Supplementary Table 25. Comparison between train and holdout performances for**  
793 **different risk models**

794  
795

| Model                                                             | Train AUC (95% CI) | Holdout AUC (95% CI) |
|-------------------------------------------------------------------|--------------------|----------------------|
| Susceptibility– no symptoms (Dem + Exp)                           | 0.83 (0.81, 0.85)  | 0.84 (0.82, 0.84)    |
| Susceptibility– with symptoms (Dem + Exp + Symp)                  | 0.95 (0.93, 0.97)  | 0.94 (0.92, 0.96)    |
| Susceptibility– literature-based "minimal" model (HWF Exp + Symp) | 0.90 (0.88, 0.92)  | 0.90 (0.88, 0.93)    |
| Susceptibility– literature-based "symptoms-only" model (HWF Symp) | 0.87 (0.84, 0.90)  | 0.87 (0.84, 0.90)    |
| Severity– hospitalization                                         | 0.85 (0.82, 0.88)  | 0.87 (0.84, 0.90)    |
| Severity– critical case of COVID-19                               | 0.90 (0.87, 0.93)  | 0.90 (0.87, 0.93)    |

796  
797 Columns reflect mean and nominal 95% confidence intervals for the area under the curve (AUC)  
798 of trained models on either the training or holdout dataset. Confidence intervals were estimated  
799 via bootstrapping (Methods).  
800

801 **Supplementary Table 26. Stratified holdout performance assessment for models to predict**  
 802 **hospitalization amongst COVID-19 positive cases**

803

| cohort                                    | N    | ncase | ncontrol | Auc               | Sensitivity       | Specificity       |
|-------------------------------------------|------|-------|----------|-------------------|-------------------|-------------------|
| Admixed African-European Genetic Ancestry | 110  | 20    | 90       | 0.81 (0.72, 0.90) | 0.85 (0.68, 1.00) | 0.71 (0.62, 0.80) |
| All                                       | 1793 | 191   | 1602     | 0.87 (0.84, 0.90) | 0.83 (0.78, 0.88) | 0.75 (0.73, 0.77) |
| European Genetic Ancestry                 | 1133 | 120   | 1013     | 0.87 (0.84, 0.90) | 0.82 (0.76, 0.89) | 0.74 (0.72, 0.77) |
| Admixed Amerindian Genetic Ancestry       | 219  | 16    | 203      | 0.94 (0.90, 0.98) | 0.93 (0.81, 1.00) | 0.79 (0.74, 0.85) |
| Other Genetic Ancestry                    | 331  | 35    | 296      | 0.85 (0.77, 0.93) | 0.80 (0.67, 0.94) | 0.75 (0.70, 0.80) |
| Ages 18-29                                | 201  | 7     | 194      | 0.95 (0.91, 0.99) | 0.85 (0.57, 1.00) | 0.90 (0.85, 0.94) |
| Ages 30-49                                | 705  | 49    | 656      | 0.87 (0.82, 0.93) | 0.76 (0.63, 0.88) | 0.85 (0.82, 0.88) |
| Ages 50-65                                | 616  | 78    | 538      | 0.86 (0.81, 0.90) | 0.86 (0.78, 0.94) | 0.65 (0.61, 0.69) |
| Ages 65+                                  | 271  | 57    | 214      | 0.78 (0.72, 0.85) | 0.86 (0.77, 0.95) | 0.53 (0.47, 0.60) |
| Female                                    | 1166 | 118   | 1048     | 0.87 (0.83, 0.90) | 0.80 (0.72, 0.87) | 0.77 (0.74, 0.79) |
| Male                                      | 627  | 73    | 554      | 0.87 (0.83, 0.91) | 0.89 (0.82, 0.96) | 0.71 (0.67, 0.75) |

804

805 Case/control status is defined based on self-reported hospitalization due to COVID-19-related  
 806 illness (Methods). Metric performance columns reflect mean and nominal 95% confidence  
 807 intervals for each metric on an internal, independent holdout dataset (Methods). Cohort-level  
 808 receiver operator characteristic (ROC) curves were constructed from predicted class probabilities  
 809 of models trained on the entire survey cohort (Methods).

810

811

812 **Supplementary Table 27. Stratified holdout performance assessment for models to predict**  
 813 **critical COVID-19 cases amongst all COVID-19 positive cases**

814

| cohort                                    | N    | ncase | ncontrol | AUC               | Sensitivity       | Specificity       |
|-------------------------------------------|------|-------|----------|-------------------|-------------------|-------------------|
| Admixed African-European Genetic Ancestry | 110  | 15    | 95       | 0.87 (0.78, 0.97) | 0.93 (0.80, 1.00) | 0.75 (0.66, 0.83) |
| All                                       | 1793 | 105   | 1688     | 0.90 (0.87, 0.93) | 0.93 (0.87, 0.98) | 0.79 (0.77, 0.81) |
| European Genetic Ancestry                 | 1133 | 70    | 1063     | 0.90 (0.86, 0.93) | 0.90 (0.83, 0.97) | 0.79 (0.76, 0.81) |
| Admixed Amerindian Genetic Ancestry       | 219  | 7     | 212      | 0.92 (0.88, 0.96) | 1.00 (0.60, 1.00) | 0.83 (0.78, 0.88) |
| Other Genetic Ancestry                    | 331  | 13    | 318      | 0.92 (0.87, 0.97) | 1.00 (0.73, 1.00) | 0.77 (0.73, 0.82) |
| Ages 18-29                                | 201  | 2     | 199      | 0.96 (0.92, 0.99) | 1.00 (0.29, 1.00) | 0.92 (0.88, 0.96) |
| Ages 30-49                                | 705  | 24    | 681      | 0.94 (0.92, 0.96) | 1.00 (0.84, 1.00) | 0.84 (0.81, 0.87) |
| Ages 50-65                                | 616  | 43    | 573      | 0.87 (0.82, 0.93) | 0.91 (0.82, 0.99) | 0.71 (0.68, 0.75) |
| Ages 65+                                  | 271  | 36    | 235      | 0.84 (0.78, 0.91) | 0.89 (0.78, 0.99) | 0.71 (0.66, 0.77) |
| Female                                    | 1166 | 60    | 1106     | 0.90 (0.86, 0.94) | 0.93 (0.87, 1.00) | 0.80 (0.77, 0.83) |
| Male                                      | 627  | 45    | 582      | 0.89 (0.85, 0.93) | 0.91 (0.83, 0.99) | 0.77 (0.73, 0.80) |

815  
 816 Case/control status is defined based on self-reported critical case progression among all COVID-  
 817 19 cases. Here, a critical case is defined based on self-reported ICU admittance, respiratory  
 818 failure, organ failure, or septic shock resulting from COVID-19-related illness (Methods). Metric  
 819 performance columns reflect mean and nominal 95% confidence intervals for each metric on an  
 820 internal, independent holdout dataset (Methods). Cohort-level receiver operator characteristic  
 821 (ROC) curves were constructed from predicted class probabilities of models trained on the entire  
 822 survey cohort (Methods).

823  
 824  
 825

826 **Supplementary Figures**

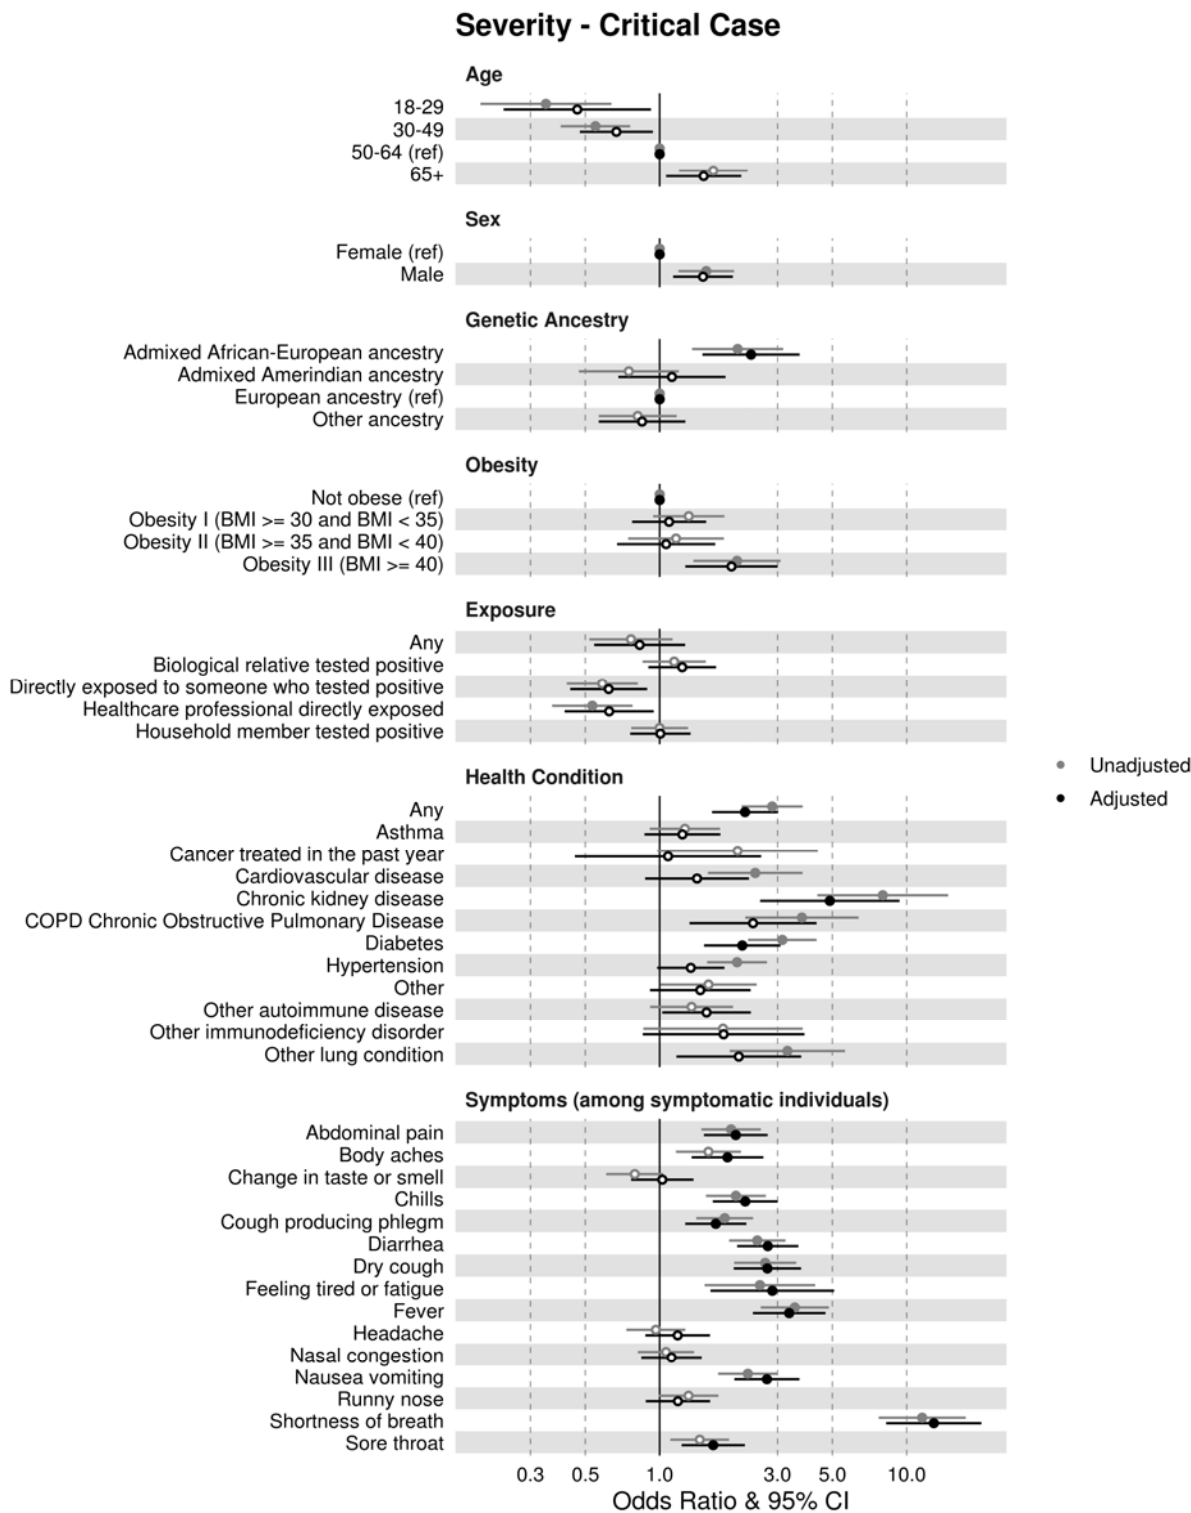

827

828 **Supplementary Figure 1. Severity (critical case) odds ratios (ORs) and 95% confidence**  
829 **intervals (CIs) estimated from simple (“Unadjusted models,” grey) and multiple**  
830 **(“Adjusted models,” black) logistic regression with adjustment for other risk factors.** Open  
831 circles indicate not significant ( $p$ -value  $> 0.05$ ) after accounting for multiple hypothesis tests  
832 using Bonferroni correction. Age, sex, genetic ancestry, and obesity ORs were estimated in  
833 relation to the reference variables indicated. Exposure, health, and symptom ORs were each  
834 estimated separately as binary variables. Symptom ORs were estimated as binary variables  
835 among symptomatic testers only (Methods). Risk factor adjustments for severity include: sex,  
836 age, obesity (Y/N), and underlying health conditions (Y/N if any).  
837

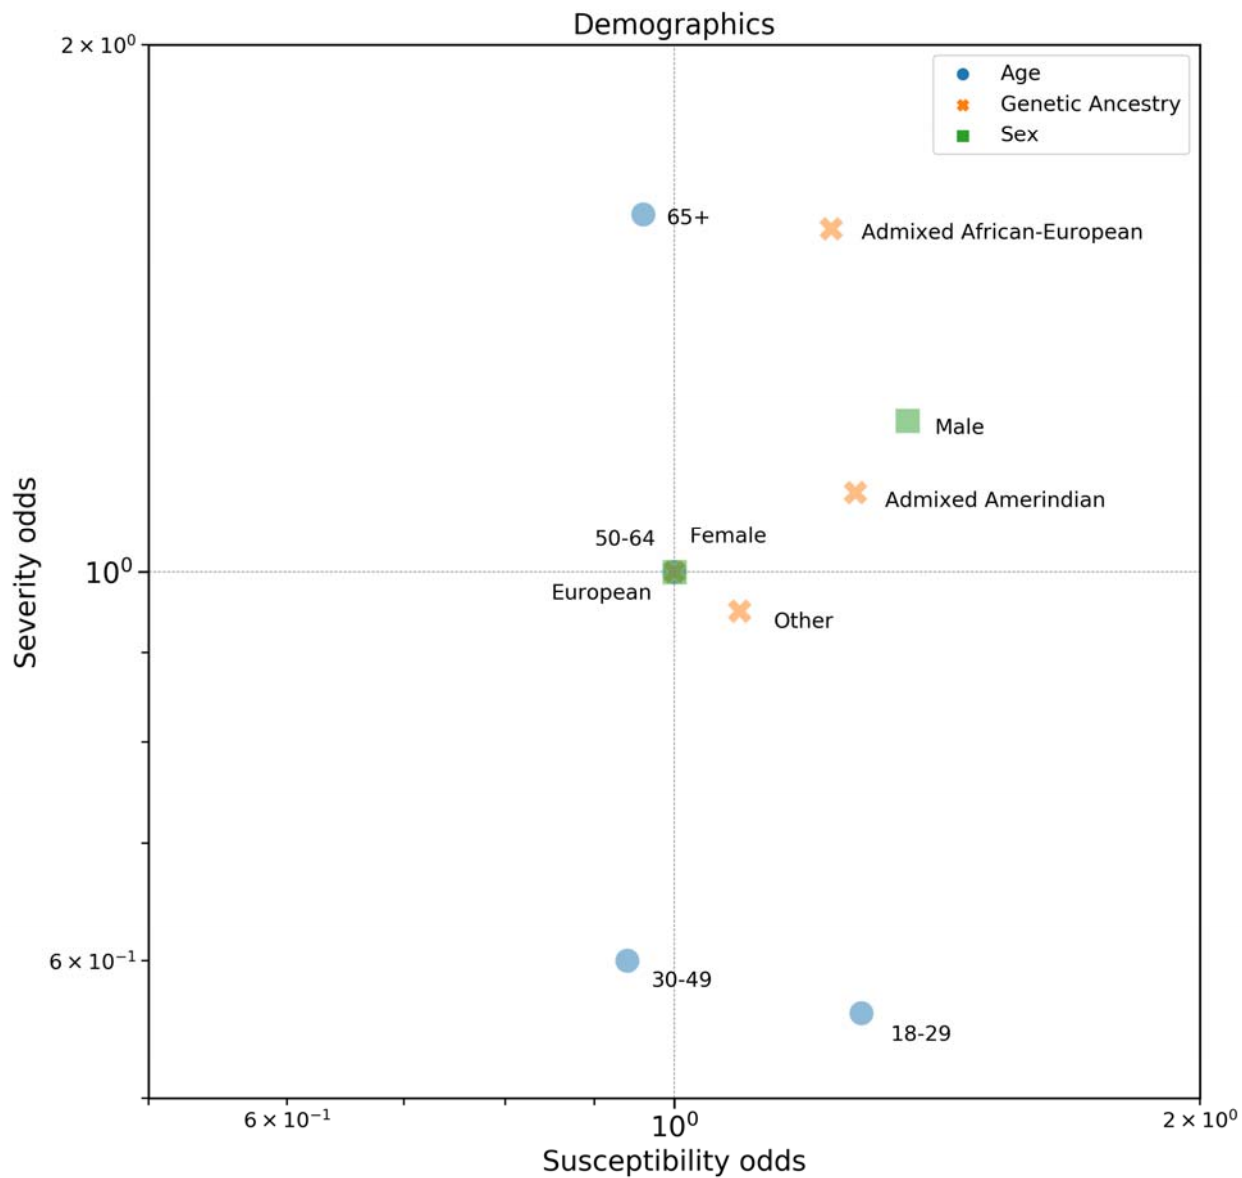

838

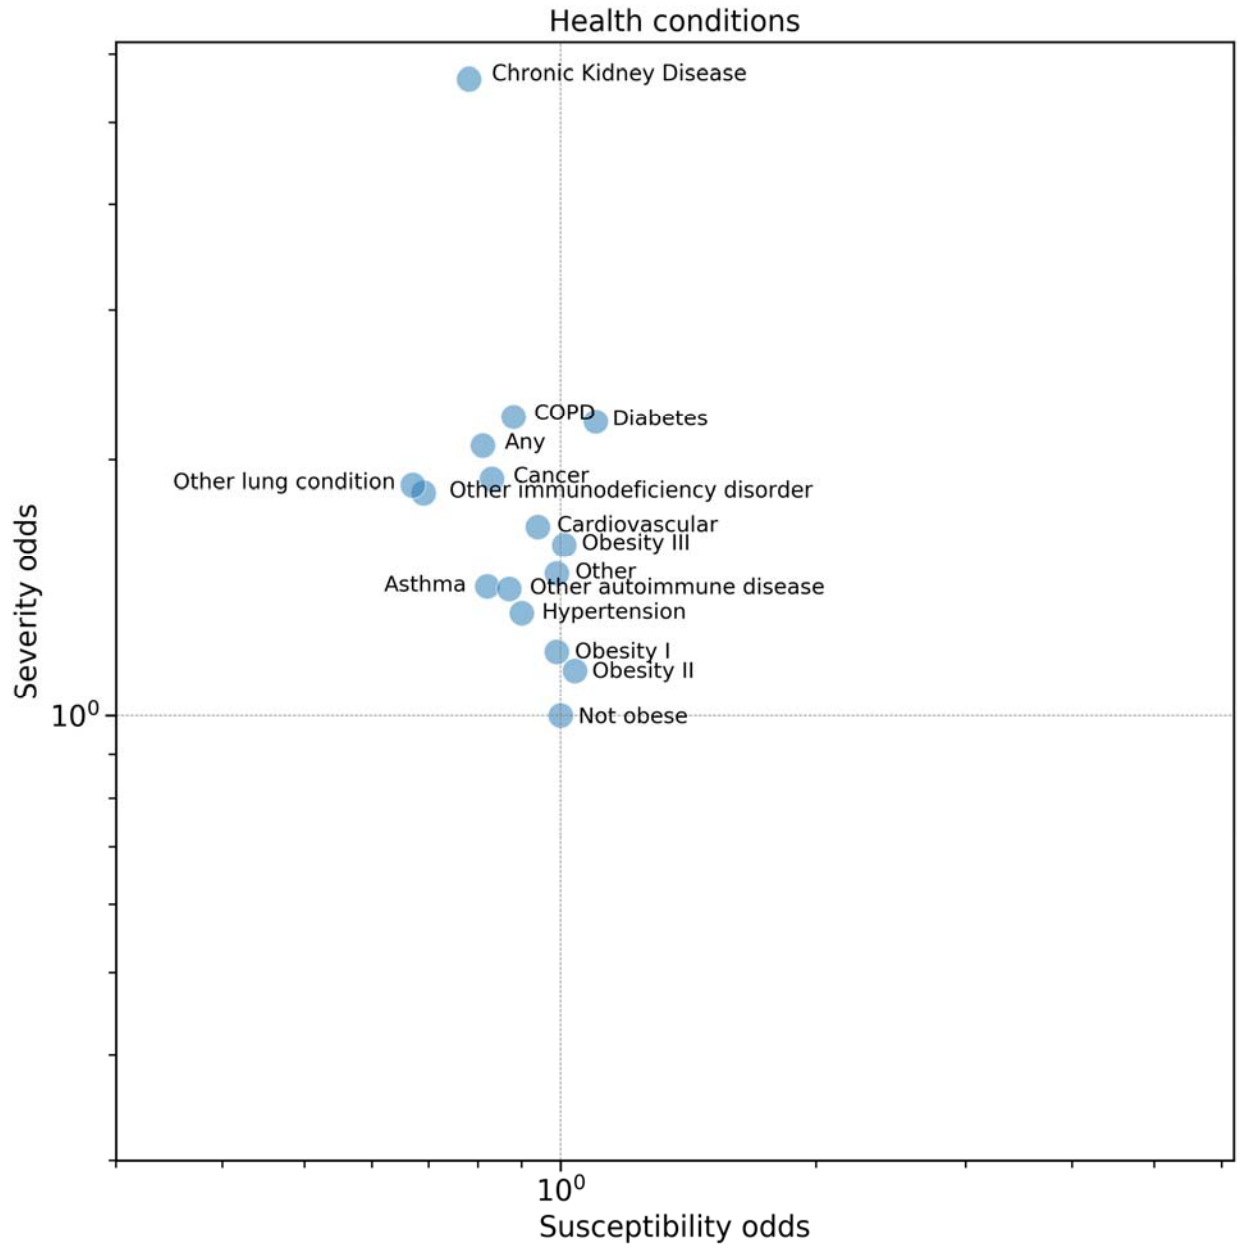

839



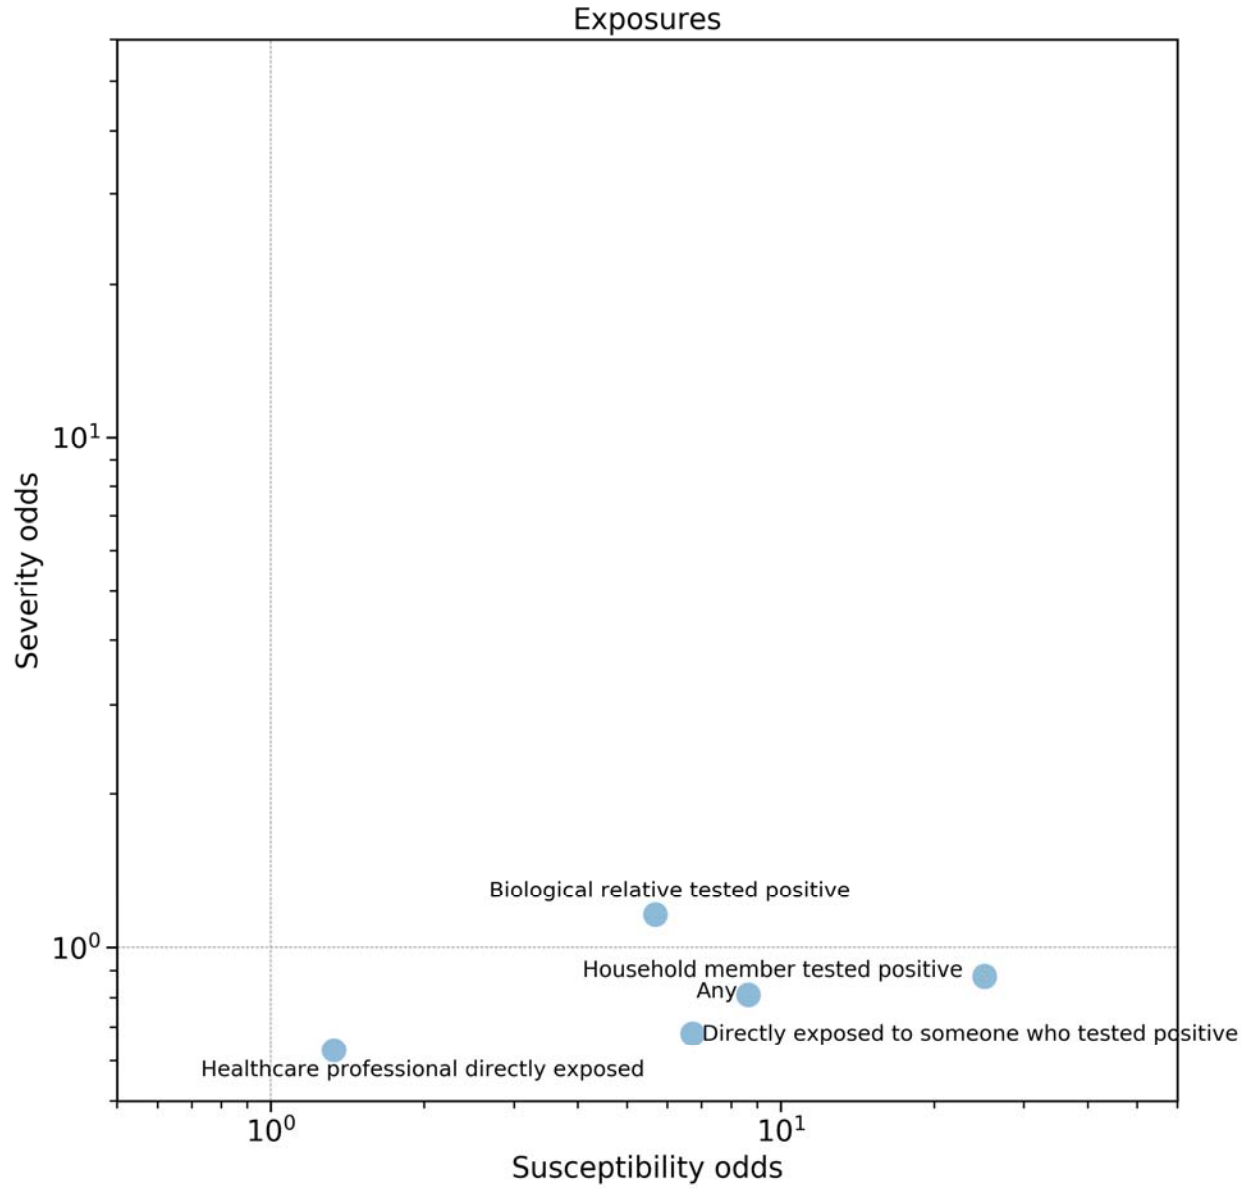

840

841 **Supplementary Figure 2: Comparison of Susceptibility and Severity adjusted ORs.**

842 Comparison of susceptibility ORs (horizontal axis) and severity ORs (vertical axis) from Figures

843 1 and 2. Severity aORs are for hospitalization. aORs are adjusted as in Figures 1 and 2 (see Fig 3

844 for adjusted ORs for symptoms). Plotted on a log scale for visibility. (a) **Demographics**, broken

845 down by age, sex, and genetic ancestry. (b) **Health conditions**: Some pre-existing health

846 conditions have increased odds of critical outcomes but susceptibility is not characterized by

847 health conditions. (c) **Exposures** are important for susceptibility but not severity.

848

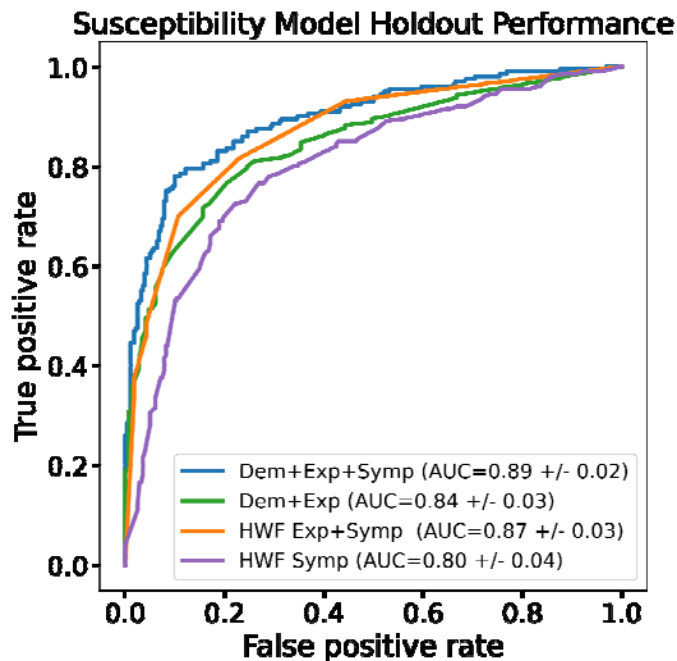

849  
850

851 **Supplementary Figure 3. Performance of susceptibility models evaluated in a symptomatic**  
852 **cohort of positive and negative testers.** Plot depicts receiver operating characteristic (ROC)  
853 curves for four susceptibility models (Supplementary Table 20). Here, the modeling cohort has  
854 been restricted to positive and negative testers reporting at least one symptom of moderate or  
855 greater intensity for model training and evaluation.

856

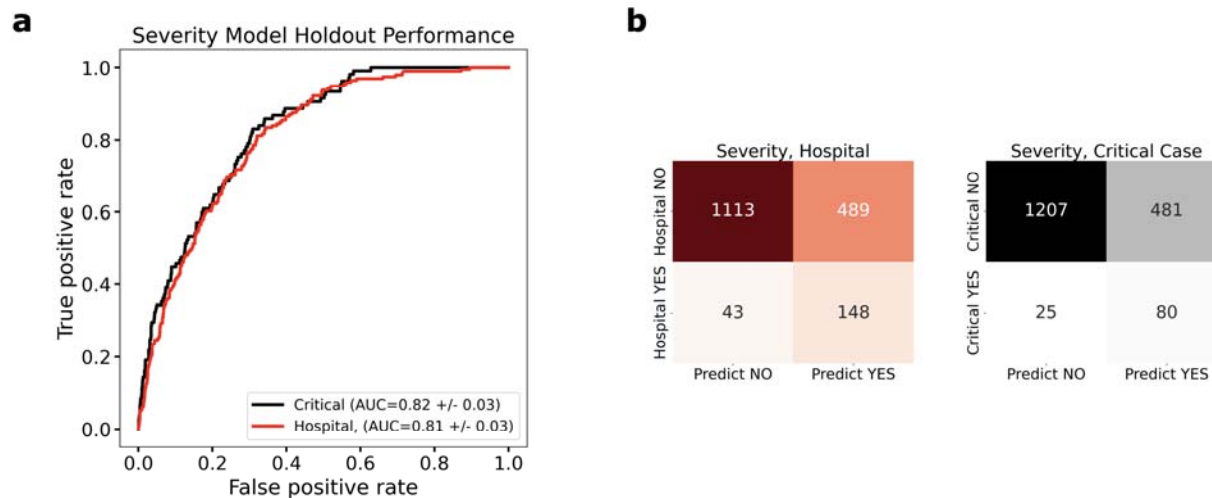

857

858 **Supplementary Figure 4. Severity Models Excluding Dyspnea (Shortness of Breath).** a)

859 Receiver operating characteristic (ROC) curves for severity models to predict either critical

860 illness progression (black) or hospitalization (red) among COVID-19 positive cases. The models

861 here are built with the same risk factors as in Figure 4 with the exclusion of dyspnea (shortness

862 of breath). b) Classification confusion matrix for severity models. Refer to Methods as well as

863 Supplementary Tables 20 for additional model risk factor information.

864 **References**

- 865 1. Williamson, E. J. *et al.* Factors associated with COVID-19-related death using  
866 OpenSAFELY. *Nature* **584**, 430–436 (2020).
- 867 2. World Health Organization. Coronavirus Disease (COVID-19)– Weekly Epidemiological  
868 Update. [https://www.who.int/docs/default-source/coronaviruse/situation-reports/20201005-](https://www.who.int/docs/default-source/coronaviruse/situation-reports/20201005-weekly-epi-update-8.pdf)  
869 [weekly-epi-update-8.pdf](https://www.who.int/docs/default-source/coronaviruse/situation-reports/20201005-weekly-epi-update-8.pdf) (2020).
- 870 3. U.S. Centers for Disease Control and Prevention (CDC). Coronavirus disease 2019 (COVID-  
871 19): CDC COVID data tracker. [https://covid.cdc.gov/covid-data-](https://covid.cdc.gov/covid-data-tracker/?CDC_AA_refVal=https%3A%2F%2Fwww.cdc.gov%2Fcoronavirus%2F2019-ncov%2Fcases-updates%2Fcases-in-us.html#cases)  
872 [tracker/?CDC\\_AA\\_refVal=https%3A%2F%2Fwww.cdc.gov%2Fcoronavirus%2F2019-](https://covid.cdc.gov/covid-data-tracker/?CDC_AA_refVal=https%3A%2F%2Fwww.cdc.gov%2Fcoronavirus%2F2019-ncov%2Fcases-updates%2Fcases-in-us.html#cases)  
873 [ncov%2Fcases-updates%2Fcases-in-us.html#cases](https://covid.cdc.gov/covid-data-tracker/?CDC_AA_refVal=https%3A%2F%2Fwww.cdc.gov%2Fcoronavirus%2F2019-ncov%2Fcases-updates%2Fcases-in-us.html#cases) (2020).
- 874 4. CMMID COVID-19 working group *et al.* Age-dependent effects in the transmission and  
875 control of COVID-19 epidemics. *Nat. Med.* **26**, 1205–1211 (2020).
- 876 5. Yale IMPACT research team *et al.* Sex differences in immune responses that underlie  
877 COVID-19 disease outcomes. *Nature* (2020) doi:10.1038/s41586-020-2700-3.
- 878 6. Roberts, G. H. L. & Park, D. S. AncestryDNA COVID-19 Host Genetic Study Identifies  
879 Three Novel Loci. *medRxiv* (2020).
- 880 7. Zhao, Y. *et al.* Single-cell RNA expression profiling of ACE2, the receptor of SARS-CoV-2.  
881 *medRxiv* (2020) doi:10.1101/2020.01.26.919985.
- 882 8. Liu, Y. *et al.* Association between age and clinical characteristics and outcomes of COVID-  
883 19. *Eur. Respir. J.* **55**, 2001112 (2020).
- 884 9. Li, X. *et al.* Risk factors for severity and mortality in adult COVID-19 inpatients in Wuhan.  
885 *J. Allergy Clin. Immunol.* **146**, 110–118 (2020).

- 886 10. Clark, A. *et al.* Global, regional, and national estimates of the population at increased risk of  
887 severe COVID-19 due to underlying health conditions in 2020: a modelling study. *Lancet*  
888 *Glob. Health* **8**, e1003–e1017 (2020).
- 889 11. Gebhard, C., Regitz-Zagrosek, V., Neuhauser, H. K., Morgan, R. & Klein, S. L. Impact of  
890 sex and gender on COVID-19 outcomes in Europe. *Biol. Sex Differ.* **11**, 29 (2020).
- 891 12. Grasselli, G. *et al.* Baseline Characteristics and Outcomes of 1591 Patients Infected With  
892 SARS-CoV-2 Admitted to ICUs of the Lombardy Region, Italy. *JAMA* **323**, 1574 (2020).
- 893 13. Richardson, S. *et al.* Presenting Characteristics, Comorbidities, and Outcomes Among 5700  
894 Patients Hospitalized With COVID-19 in the New York City Area. *JAMA* **323**, 2052 (2020).
- 895 14. Guan, W. *et al.* Comorbidity and its impact on 1590 patients with COVID-19 in China: a  
896 nationwide analysis. *Eur. Respir. J.* **55**, 2000547 (2020).
- 897 15. Ellinghaus, D. *et al.* Genomewide Association Study of Severe Covid-19 with Respiratory  
898 Failure. *N. Engl. J. Med.* NEJMoa2020283 (2020) doi:10.1056/NEJMoa2020283.
- 899 16. Wynants, L. *et al.* Prediction models for diagnosis and prognosis of covid-19: systematic  
900 review and critical appraisal. *BMJ* m1328 (2020) doi:10.1136/bmj.m1328.
- 901 17. Menni, C. *et al.* Real-time tracking of self-reported symptoms to predict potential COVID-  
902 19. *Nat. Med.* **26**, 1037–1040 (2020).
- 903 18. Allen, W. E. *et al.* Population-scale longitudinal mapping of COVID-19 symptoms,  
904 behaviour and testing. *Nat. Hum. Behav.* **4**, 972–982 (2020).
- 905 19. Martin, L. M., Leff, M., Garrett, C. & Nelson, D. E. Validation of self-reported chronic  
906 conditions and health services in a managed care population. *Am J Prev Med* **18**, 215–8  
907 (2000).

- 908 20. Nguyen, L. H. *et al.* Risk of COVID-19 among front-line health-care workers and the  
909 general community: a prospective cohort study. *Lancet Public Health* **5**, e475–e483 (2020).
- 910 21. Stokes, E. K. *et al.* Coronavirus Disease 2019 Case Surveillance — United States, January  
911 22–May 30, 2020. *MMWR Morb. Mortal. Wkly. Rep.* **69**, 759–765 (2020).
- 912 22. Chow, E. J. *et al.* Symptom Screening at Illness Onset of Health Care Personnel With SARS-  
913 CoV-2 Infection in King County, Washington. *JAMA* **323**, 2087 (2020).
- 914 23. Shi, L., Wang, Y., Wang, Y., Duan, G. & Yang, H. Dyspnea rather than fever is a risk factor  
915 for predicting mortality in patients with COVID-19. *J. Infect.* S0163445320302887 (2020)  
916 doi:10.1016/j.jinf.2020.05.013.
- 917 24. Jehi, L. *et al.* Individualizing Risk Prediction for Positive Coronavirus Disease 2019 Testing.  
918 *Chest* S0012369220316548 (2020) doi:10.1016/j.chest.2020.05.580.
- 919 25. Barreto, M. L. Infectious diseases epidemiology. *J. Epidemiol. Community Health* **60**, 192–  
920 195 (2006).
- 921 26. Rosenberg, A., Keene, D. E., Schlesinger, P., Groves, A. K. & Blankenship, K. M. COVID-  
922 19 and Hidden Housing Vulnerabilities: Implications for Health Equity, New Haven,  
923 Connecticut. *AIDS Behav.* **24**, 2007–2008 (2020).
- 924 27. Price-Haywood, E. G., Burton, J., Fort, D. & Seoane, L. Hospitalization and Mortality  
925 among Black Patients and White Patients with Covid-19. *N. Engl. J. Med.* **382**, 2534–2543  
926 (2020).
- 927 28. Millett, G. A. *et al.* Assessing differential impacts of COVID-19 on black communities. *Ann.*  
928 *Epidemiol.* **47**, 37–44 (2020).
- 929 29. Webb Hooper, M., Nápoles, A. M. & Pérez-Stable, E. J. COVID-19 and Racial/Ethnic  
930 Disparities. *JAMA* **323**, 2466 (2020).

- 931 30. Julie Bosman & Mervosch, S. As virus surges, younger people account for ‘disturbing’  
932 number of cases. *The New York Times* (2020).
- 933 31. Jehi, L. *et al.* Development and validation of a model for individualized prediction of  
934 hospitalization risk in 4,536 patients with COVID-19. *PLOS ONE* **15**, e0237419 (2020).
- 935 32. Dietz, W. & Santos-Burgoa, C. Obesity and its Implications for COVID-19 Mortality.  
936 *Obesity* **28**, 1005–1005 (2020).
- 937 33. U.S. Centers for Disease Control and Prevention (CDC). Coronavirus disease: people with  
938 certain medical conditions. [https://www.cdc.gov/coronavirus/2019-ncov/need-extra-](https://www.cdc.gov/coronavirus/2019-ncov/need-extra-precautions/people-with-medical-conditions.html?CDC_AA_refVal=https%3A%2F%2Fwww.cdc.gov%2Fcoronavirus%2F2019-ncov%2Fneed-extra-precautions%2Fgroups-at-higher-risk.html)  
939 [precautions/people-with-medical-](https://www.cdc.gov/coronavirus/2019-ncov/need-extra-precautions/people-with-medical-conditions.html?CDC_AA_refVal=https%3A%2F%2Fwww.cdc.gov%2Fcoronavirus%2F2019-ncov%2Fneed-extra-precautions%2Fgroups-at-higher-risk.html)  
940 [conditions.html?CDC\\_AA\\_refVal=https%3A%2F%2Fwww.cdc.gov%2Fcoronavirus%2F20](https://www.cdc.gov/coronavirus/2019-ncov/need-extra-precautions/people-with-medical-conditions.html?CDC_AA_refVal=https%3A%2F%2Fwww.cdc.gov%2Fcoronavirus%2F2019-ncov%2Fneed-extra-precautions%2Fgroups-at-higher-risk.html)  
941 [19-ncov%2Fneed-extra-precautions%2Fgroups-at-higher-risk.html](https://www.cdc.gov/coronavirus/2019-ncov/need-extra-precautions/people-with-medical-conditions.html?CDC_AA_refVal=https%3A%2F%2Fwww.cdc.gov%2Fcoronavirus%2F2019-ncov%2Fneed-extra-precautions%2Fgroups-at-higher-risk.html) (2020).
- 942 34. U.S. Centers for Disease Control and Prevention (CDC). Coronavirus disease: scientific  
943 evidence for conditions that increase risk of severe illness.  
944 <https://www.cdc.gov/coronavirus/2019-ncov/need-extra-precautions/evidence-table.html>  
945 (2020).
- 946 35. Han, E. *et al.* Clustering of 770,000 genomes reveals post-colonial population structure of  
947 North America. *Nat. Commun.* **8**, 14238 (2017).
- 948 36. Ball, C. A. Ethnicity Estimate 2019 White Paper.  
949 [https://www.ancestrycdn.com/dna/static/pdf/whitepapers/EV2019\\_white\\_paper\\_2.pdf](https://www.ancestrycdn.com/dna/static/pdf/whitepapers/EV2019_white_paper_2.pdf)  
950 (2019).
- 951 37. Hastie, T. *The Elements of Statistical Learning: Data Mining, Inference, and Prediction*.  
952 (Springer, 2009).



- 953 38. U.S. Centers for Disease Control and Prevention (CDC). Symptoms of Coronavirus.  
954 <https://www.cdc.gov/coronavirus/2019-ncov/symptoms-testing/symptoms.html> (2020).
- 955 39. Jing, Q.-L. *et al.* Household secondary attack rate of COVID-19 and associated determinants  
956 in Guangzhou, China: a retrospective cohort study. *Lancet Infect. Dis.* S1473309920304710  
957 (2020) doi:10.1016/S1473-3099(20)30471-0.
- 958 40. Hu, Z. *et al.* Clinical characteristics of 24 asymptomatic infections with COVID-19 screened  
959 among close contacts in Nanjing, China. 6 (2020).
- 960
